# Supplementary material for: Formation of highly oxygenated organic molecules from the oxidation of limonene by OH radical: significant contribution of H-abstraction pathway
Source: Copernicus journal article supplement (doi:10.5194/acp-23-7297-2023), 2023-07-04
Supplement: Supplementary file 1 [file acp-23-7297-2023-supplement.pdf]

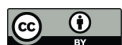

*Supplement of*

**Formation of highly oxygenated organic molecules  
from the oxidation of limonene by OH radical:  
significant contribution of H-abstraction pathway**

**Hao Luo et al.**

*Correspondence to:* Defeng Zhao (dfzhao@fudan.edu.cn) and Thomas F. Mentel (t.mentel@fz-juelich.de)

The copyright of individual parts of the supplement might differ from the article licence.

This supplement expounds the calibration coefficient of  $\text{NO}_3^-$ -CIMS for  $\text{H}_2\text{SO}_4$  and the distribution and possible formation pathway of monomers with carbon number less than 10 and dimers. Moreover, additional schemes, figures and tables are presented beside those in the main text.

## 5 S1 Calibration coefficient of NO<sub>3</sub><sup>-</sup>-CIMS for H<sub>2</sub>SO<sub>4</sub>

The calibration coefficient of H<sub>2</sub>SO<sub>4</sub> was used to convert peak intensity measured by CIMS to concentrations. The concentrations of H<sub>2</sub>SO<sub>4</sub> can be described as follows:

$$[H_2SO_4] = C \times I \quad (\text{Eq. S1})$$

10 where C is the calibration coefficient of H<sub>2</sub>SO<sub>4</sub>, I is the peak intensity of H<sub>2</sub>SO<sub>4</sub> determined by normalized peak area of H<sub>2</sub>SO<sub>4</sub> at time t, i.e., the peak area divided by total signal of mass spectrum (termed as normalized count (nc)).

15 In this study, the concentration of HOM was calculated according the calibration coefficient of H<sub>2</sub>SO<sub>4</sub> and peak intensity of HOM. It relies on the premises that the charging efficiency of HOM and H<sub>2</sub>SO<sub>4</sub> by NO<sub>3</sub><sup>-</sup> are about the same and close to the collision limit (Ehn et al., 2014; Jokinen et al., 2015). In the SAPHIR chamber, H<sub>2</sub>SO<sub>4</sub> was generated from oxidation of SO<sub>2</sub> by OH radical (Zhao et al., 2016). OH radicals and SO<sub>2</sub> were characterized by using laser induced fluorescence (LIF) and SO<sub>2</sub> analyzer (Thermo Systems 43i), respectively (Zhao et al., 2021). The concentration of H<sub>2</sub>SO<sub>4</sub> in the chamber can be described by the following equation.

$$\frac{d[H_2SO_4]}{dt} = k[SO_2][OH] - (k_{wl} + k_{dil})[H_2SO_4] \quad (\text{Eq. S2})$$

20 where [H<sub>2</sub>SO<sub>4</sub>], [SO<sub>2</sub>], [OH] represent the respective concentration, k is the rate constant for the reaction of SO<sub>2</sub> with OH, k<sub>wl</sub> and k<sub>dil</sub> are the wall loss rate of H<sub>2</sub>SO<sub>4</sub> (~2.2×10<sup>-3</sup> s<sup>-1</sup> in fan-on condition; ~6.0×10<sup>-4</sup> s<sup>-1</sup> in fan-off condition) and the dilution rate of H<sub>2</sub>SO<sub>4</sub> (~1×10<sup>-5</sup> s<sup>-1</sup>) (Zhao et al., 2018; Guo et al., 2022), respectively. Substituting Eq. S1 to Eq. S2 and integrating, one can get

$$C = \frac{k[SO_2][OH]}{\frac{I-I_0}{t} + (k_{wl} + k_{dil})I} \quad (\text{Eq. S3})$$

25 where I<sub>0</sub> is the peak intensity at the initial time. C was determined to be 2.5×10<sup>10</sup> molecules cm<sup>-3</sup> nc<sup>-1</sup> (Zhao et al., 2021). The second term of denominator in Eq. S3 is much smaller than the first term and can omitted. The uncertainty of C was estimated to -52%/+101% from the uncertainty of SO<sub>2</sub> concentration (~7%), OH concentration (~10%), I (~10%) and k (Δlogk=±0.3) using error propagation, which have been used in our previous calibration (Zhao et al., 2021).

## 30 S2 Importance of secondary-generation chemistry in HOM formation

When we focus on the early stages of the experiments (first 15 min), secondary chemistry is not important in this study. This can be quantified by the following comparison of the chemistry of the limonene and limonaldehyde, which is the dominant first-generation C<sub>10</sub> product. To quantify the relative importance of these two pathways, the relative reaction rates of hydrogen abstraction from limonene+OH to that from limonaldehyde+OH were calculated as below:

$$\begin{aligned} \frac{R[LIM + OH]_{H \text{ abstraction}}}{R[LIMAL + OH]_{H \text{ abstraction}}} &= \frac{k[LIM + OH] \times [LIM] \times [OH] \times BR_{LIM}[H \text{ abstraction}]}{k[LIMAL + OH] \times [LIMAL] \times [OH] \times BR_{LIMAL}[H \text{ abstraction}]} \\ &= \frac{k[LIM+OH] \times [LIM] \times BR_{LIM}[H \text{ abstraction}]}{k[LIMAL+OH] \times [LIMAL] \times BR_{LIMAL}[H \text{ abstraction}]} \quad (\text{Eq. S4}) \end{aligned}$$

where  $k[\text{LIM}+\text{OH}]$  and  $k[\text{LIMAL}+\text{OH}]$  are reaction rate constants based on MCM v3.3.1 (Atkinson, 1997).  $[\text{LIM}]$ ,  $[\text{LIMAL}]$ , and  $[\text{OH}]$  are the concentrations of limonene, limonaldehyde, and OH radicals, while limonene and OH radicals concentrations were measured and concentrations of limonaldehyde were estimated on the basis of their NO-dependent yields (0.29 at low NO and 0.28 at high NO) ( $Y[\text{LIMAL}]$  in Equation S4) (Hakola et al., 1994).  $\text{BR}_{\text{LIM}}[\text{H abstraction}]$  and  $\text{BR}_{\text{LIMAL}}[\text{H abstraction}]$  are the branching ratio of H-abstraction channel from limonene + OH and limonaldehyde + OH, respectively. The branching ratio is 0.34 for the reaction limonene + OH (Rio et al., 2010) and 0.29 for limonaldehyde + OH based on MCM v3.3.1 (<http://mcm.york.ac.uk/>). The uncertainties of the relative reaction rates were estimated to be -41%/+141% at low NO and high NO, from the uncertainty of limonene concentration (~15%),  $k[\text{LIM}+\text{OH}]$  ( $\Delta\log k = \pm 0.08$ ), and  $Y[\text{LIMAL}]$  ( $\pm 0.06$  at low NO and high NO) using error propagation. As a result, hydrogen abstraction from limonene is 19-1600 times faster than that from limonaldehyde at low NO and 29-87 times at high NO (Fig. S9). Note that the concentrations of limonaldehyde were estimated from consumed limonene, which only reflect the production and neglect consumption. Therefore, the relative importance of limonaldehyde was even overestimated using this method. Based on this evidence, the contribution of limonaldehyde to HOM formation was likely negligible at early stages of the experiments. Therefore, the second-generation reactions are unlikely to contribute the  $\text{C}_{10}\text{H}_{15}\text{O}_x$ -related HOM observed in our study.

### S3 Formation mechanism of $\text{C}_{<10}$ monomers

$\text{C}_7\text{H}_8\text{O}_x$  ( $x=5-7, 9, 14$ ) and  $\text{C}_9\text{H}_{15}\text{NO}_x$  ( $x=6-14$ ) were the most abundant  $\text{C}_{<10}$  monomers at low and high NO, respectively, with  $\text{C}_9\text{H}_{15}\text{NO}_x$  the second most abundant  $\text{C}_{<10}$  monomers family in low NO condition. In addition,  $\text{C}_7\text{H}_9\text{O}_x\cdot$  ( $x=5,10$ ) and  $\text{C}_7\text{H}_{11}\text{O}_x\cdot$  ( $x=10,11$ ) were also observed at high NO. Given the smaller carbon backbone, these monomers are likely formed from fragmentation reactions of an alkoxy intermediate formed in the reaction of  $\text{RO}_2$  with NO, the dominant bimolecular  $\text{RO}_2$  loss process in our reaction system. Within the first 15 min of the experiments, at low and high NO the ratios of  $\frac{\text{C}_{6-9} \text{ monomers}}{\text{total HOM products}}$  are 0.24 and 0.46, respectively. This is consistent with the ratios of  $\frac{\text{C}_{10}\text{H}_{15}\text{NO}_x + \text{C}_{10}\text{H}_{17}\text{NO}_x}{\text{C}_{10} \text{ monomers}}$  (0.28 and 0.55 at low and high NO, respectively), which indicated that high NO concentration is conducive to the generation of organic nitrates and fragment products.

For  $\text{C}_9\text{H}_{15}\text{NO}_x$ , a formation pathway based on the OH addition step on the exocyclic double bond seems most likely (see below), though other pathways may exist. This mechanism of single carbon loss in monoterpene oxidation was already discussed in previous work (Bianchi et al., 2019; Fry et al., 2011). It initially forms limonaketone which is oxidized further after reaction with OH; this compound is known to form SOA (e.g. Donahue et al. (2007)). The  $\text{C}_9\text{H}_{15}\text{NO}_x$  product family was also observed in the  $\text{NO}_3$  initiated oxidation of limonene, however it gained its nitrogen by the  $\text{NO}_3$  radical addition (Guo et al., 2022). In field observations, the  $\text{C}_9\text{H}_{15}\text{NO}_x$  nitrate family was found to reach a maximum during daytime between 9:00 and 12:00, highly correlated with the  $\text{NO}_x$  maximum concentration (Massoli et al., 2018).

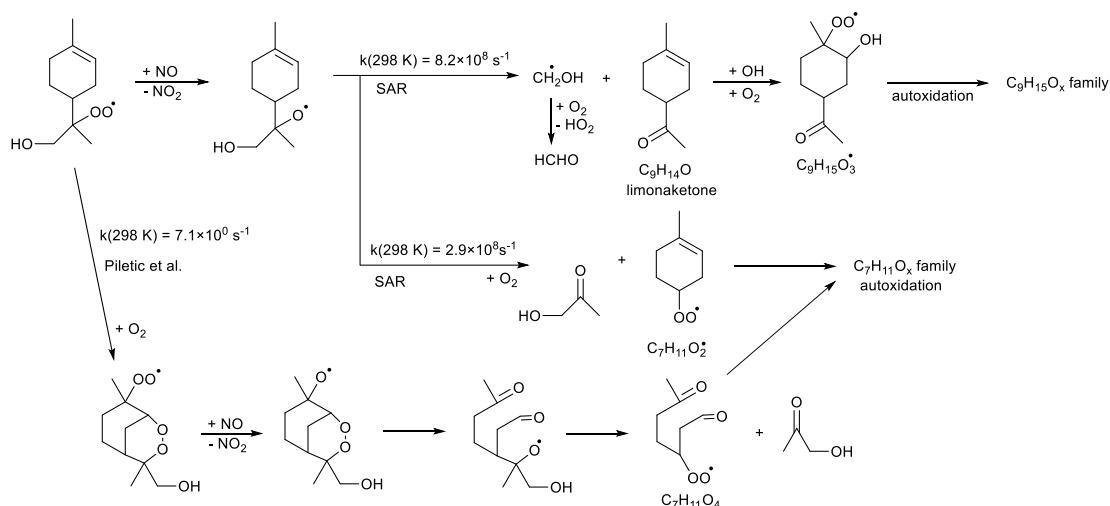

75

**Scheme S1. Example reaction scheme for  $C_7H_{11}O_x\bullet$  and  $C_9H_{15}O_x\bullet$  family formation**

Formation of  $C_7$  HOM is more pronounced at low NO conditions where autoxidation of  $RO_2$  has less competition by reaction with NO, suggesting that  $C_7$  HOM are likely formed by fragmentation of oxygenated intermediates, e.g., alkoxy formed from the reaction of  $RO_2$  with NO. Furthermore, for e.g.,  $C_7H_8O_x$  ( $x=5-7, 9, 14$ ) not all members of the family were observed, which suggests they are likely not formed from their own autoxidation chains as most  $C_{10}$  monomers, but from fragmentation of  $C_{10}$  monomers.

The OH addition channel (see above) readily produces  $C_7H_{11}O_x\bullet$ , which can autoxidize (possibly involving further alkoxy-peroxy steps) to generate the corresponding family of HOM. For  $C_7H_9O_x\bullet$  we show an example pathway from an intermediate proposed in the  $C_{10}$  autoxidation chain after H-abstraction (see scheme 2 in the main text). The latter  $RO_2$  family also gives rise to the observed termination  $C_7H_8O_x$  products, which was also observed in limonene+ $O_3$  oxidation (Tomaz et al., 2021).

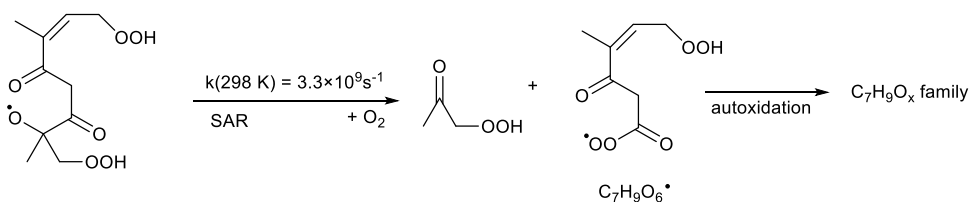

90

**Scheme S2. Example reaction scheme for  $C_7H_9O_x\bullet$  family formation**

We could not find an apparent pathway to  $C_8H_{11}O_x\bullet$  which is analogously to the example mechanisms proposed in this work. However, alkoxy fragmentation in other autoxidation pathways of the ring-opened intermediates, or in intermediates formed in secondary chemistry, are likely to offer pathways to these radicals.

It seems likely that many of these  $C_{<10}$  HOM families are not necessarily formed from one parent

100 molecule that undergoes autoxidation, but rather that a fraction of the C<sub>10</sub> HOM autoxidation intermediates decomposes after reaction with NO throughout the entire C<sub>10</sub> autoxidation chain. The probability of decomposition then depends on the lifetime of the RO<sub>2</sub> intermediate, in competition with the NO reaction, and the competition between fragmentation and H-migration in the resulting alkoxy radical. Given the highly branched mechanism, it is outside the scope of this work to try and create a full model to describe this, and such a diffuse set of C<sub><10</sub> HOM sources would make a simplified model analysis of the HOM yields meaningless.

## S4 Formation mechanism of dimers

105 The formation pathways of all dimer families were considered as accretion reaction of two monomers RO<sub>2</sub>, which followed the Reaction S1 (R. S1). Similar to monomers, several dimer families were observable in HOM dimer spectrum. Among the dimers, compounds with 20 carbons are the dominant families. We take C<sub>20</sub>H<sub>30-34</sub>O<sub>x</sub> families as examples to further discuss the formation pathway of dimers observed in our experiments. Based on reaction R. S1, C<sub>20</sub>H<sub>30</sub>O<sub>x</sub> families are likely formed by two RO<sub>2</sub> radicals C<sub>10</sub>H<sub>15</sub>O<sub>x</sub>• (R. S2). As x in the monomers is above 7, the oxygen number of C<sub>20</sub>H<sub>30</sub>O<sub>x</sub> is expected to be above 12, with an O<sub>2</sub> eliminated in the dimerization reaction. This is generally in accord with the relatively higher intensity of C<sub>20</sub>H<sub>30</sub>O<sub>x</sub> with x≥12 in this families at both low and high NO (Table S8 and Table S9). However, at low NO, there are still very small amounts C<sub>20</sub>H<sub>30</sub>O<sub>10</sub> (1.3%) observed. Based on reaction R. S2, C<sub>10</sub>H<sub>15</sub>O<sub>x</sub>• radicals with x≤6 were required to participate in dimer formation to explain the observed C<sub>20</sub>H<sub>30</sub>O<sub>10</sub>. However, we did not observe them because of their low concentration or the lower sensitivity of NO<sub>3</sub><sup>-</sup>-CIMS to less oxygenated organics.

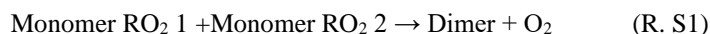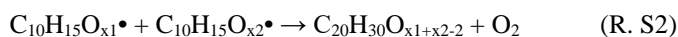

120 Similarly, C<sub>20</sub>H<sub>34</sub>O<sub>x</sub> families were likely formed by two C<sub>10</sub>H<sub>17</sub>O<sub>x</sub>• radicals, as reaction R. S3 shows. As x in the monomers are above 8 in low NO condition and above 5 at high NO condition, the oxygen number of C<sub>20</sub>H<sub>34</sub>O<sub>x</sub> is expected to be above 14 and 8, respectively. However, we still observed C<sub>20</sub>H<sub>34</sub>O<sub>x</sub> with x=10-13 in this study (Table S8 and Table S9). C<sub>20</sub>H<sub>34</sub>O<sub>x</sub> families in low NO condition may be attributed to the participation some other less oxygenated RO<sub>2</sub> radicals in dimer formation, which cannot be detected by NO<sub>3</sub><sup>-</sup>-CIMS as mentioned above. This method-specific phenomenon of dimers products has also been described in our previous studies (Shen et al., 2021; Guo et al., 2022).

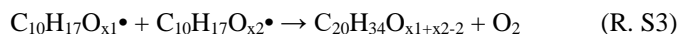

130 Moreover, C<sub>20</sub>H<sub>32</sub>O<sub>x</sub> may be formed by the cross-accretion reaction of one C<sub>10</sub>H<sub>15</sub>O<sub>x</sub>• RO<sub>2</sub> radical and one C<sub>10</sub>H<sub>17</sub>O<sub>x</sub>• RO<sub>2</sub> radical (R. S4). Due to the monomer oxygen number being above 7 and 8 in low NO condition and above 7 and 5 in high NO condition, the oxygen number of C<sub>20</sub>H<sub>32</sub>O<sub>x</sub> is expected to be above 13 and 10, respectively. The expected oxygen atom number in C<sub>20</sub>H<sub>32</sub>O<sub>x</sub> is consistent with the observation of C<sub>20</sub>H<sub>32</sub>O<sub>x(x≥10)</sub> in high NO condition (Table S9), but not consistent with the observed C<sub>20</sub>H<sub>32</sub>O<sub>x(x≥9)</sub> in low NO condition. This again suggests that less oxygenated RO<sub>2</sub> participated in dimer formation C<sub>20</sub>H<sub>32</sub>O<sub>x</sub>. The ratios of C<sub>20</sub>H<sub>30</sub>O<sub>x</sub>/C<sub>20</sub>H<sub>32</sub>O<sub>x</sub>/C<sub>20</sub>H<sub>34</sub>O<sub>x</sub> at low and high NO in the first 15 min were found to be 0.64: 1.6: 1 at low NO, and 1.12: 1.6: 1 at high NO. Based on R. S2-R. S4, these ratios can also confirm that C<sub>10</sub>H<sub>15</sub>O<sub>x</sub>• radical related chemistry plays an important role in dimers formation from limonene+OH oxidation.

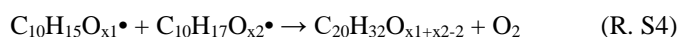

There are two more families  $C_{19}H_{30}O_x$  ( $x=10-17$ ) and  $C_{19}H_{32}O_x$  ( $x=10-15$ ) families besides the dominant  $C_{20}$  dimers families in low NO condition. Considering that  $C_{10}H_{15}O_x\bullet$  and  $C_{10}H_{17}O_x\bullet$  were the most abundant  $RO_2$  radicals in this study, and based on the above reaction pathway (R. S1),  $C_9H_{15}O_x\bullet$   $RO_2$  radicals were expected. The  $C_{19}H_{30}O_x$  and  $C_{19}H_{32}O_x$  families with oxygen numbers  $<10$  were not observed during the experiments. It is likely that the sensitivity to  $C_9H_{15}O_x\bullet$   $RO_2$  radicals with lower oxygen numbers was too low to allow detection by the  $NO_3^-$ -CIMS. Meanwhile,  $C_{17}$  or  $C_{18}$  dimers were likely formed by  $C_7$  and  $C_8$  monomers  $RO_2$  radical through the reaction pathway (R. S1). Possible formation pathways of dominant oligomer families are illustrated in Table S10. Even though the concentrations of  $C_7$  and  $C_8$  monomers  $RO_2$  radical were low and the concentrations of their dimer products were less than  $C_{20}$  dimers, as extremely low volatility organic compounds (ELVOCs), dimer are expected to be easily condensed in the particle phase (Tröstl et al., 2016) and thus still play an important role in the new particle formation or growth.

150 **S5 Supplement figures and tables**

151 **Figure S1-S9**

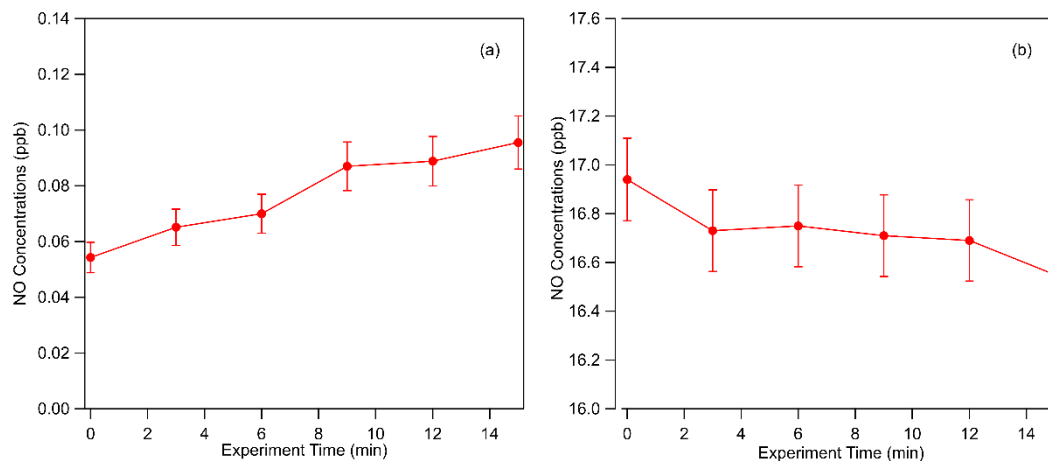

152

153 **Figure S1.** The concentrations of NO at (a) low and (b) high NO in the first 15 min experiments of this study

154

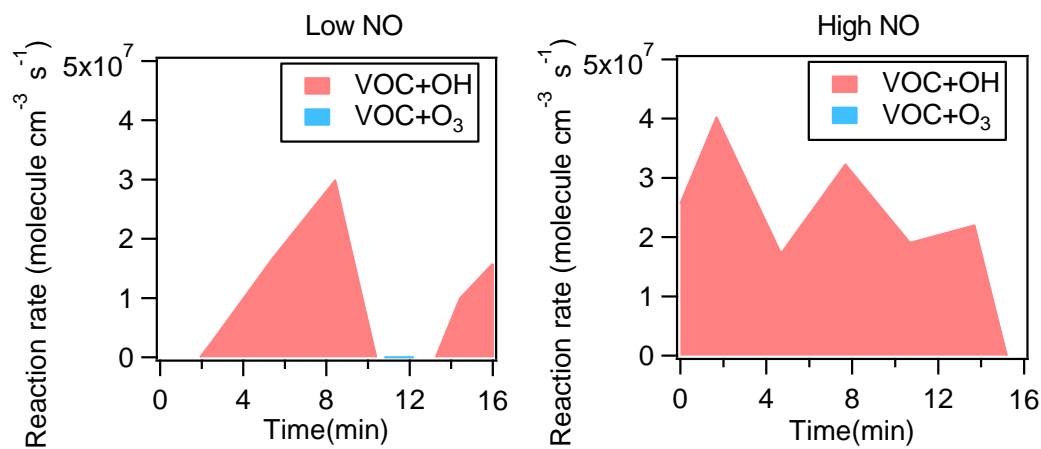

155

156 **Figure S2.** The reaction rate  $k[\text{VOC}][\text{oxidant}]$  for VOC+OH and VOC+O<sub>3</sub> at low and high NO of the first 15 min  
157 in this study. The VOC+OH rate is stacked on the VOC+O<sub>3</sub> rate. Noted that VOC+OH rate is close to zero when  
158 clouds pass by.

159



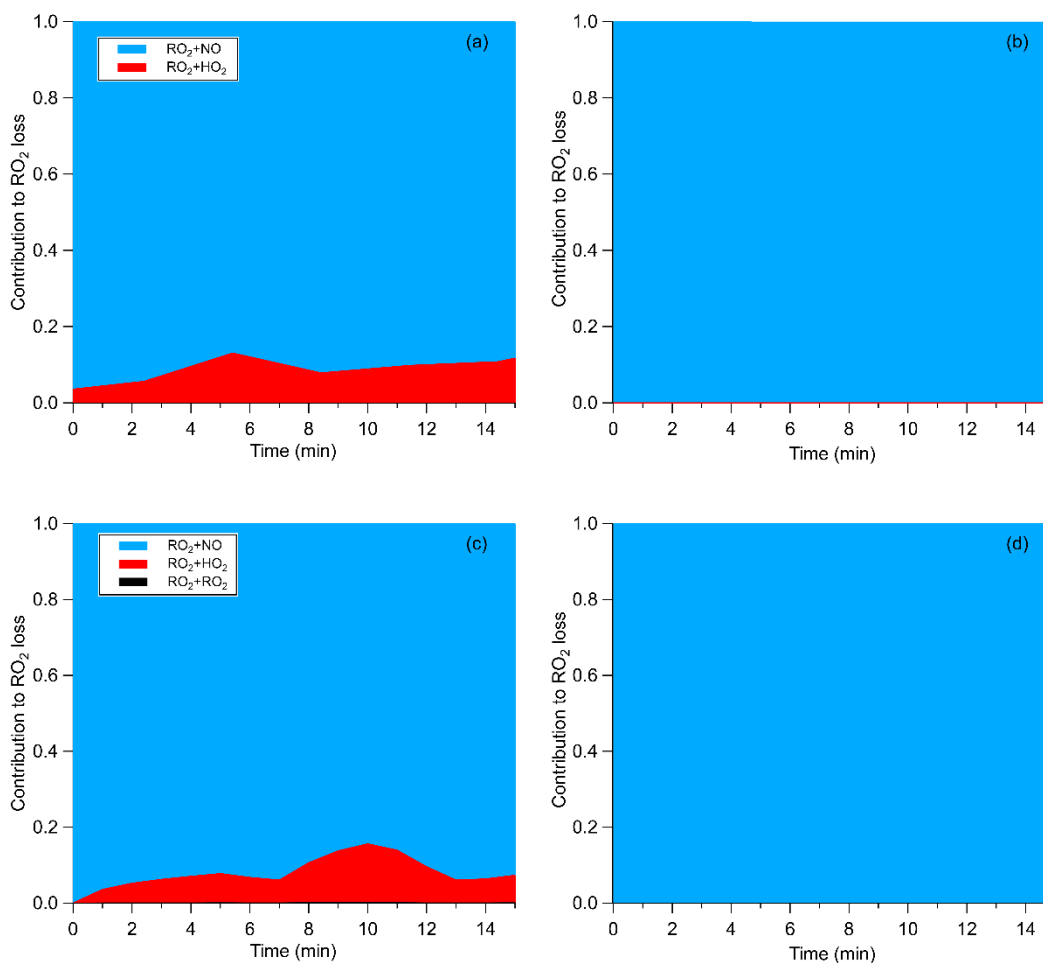

160

161

162 **Figure S3.** The contribution of RO<sub>2</sub> loss by RO<sub>2</sub>+NO and RO<sub>2</sub>+HO<sub>2</sub> at low NO (a, c) and high NO (b, d) in this  
 163 study. The contribution of RO<sub>2</sub> loss by RO<sub>2</sub>+NO and RO<sub>2</sub>+HO<sub>2</sub> in panel (a) and (b) were obtained using measured  
 164 RO<sub>2</sub>, HO<sub>2</sub>, and NO concentrations. An average reactive rate constants for the reaction RO<sub>2</sub> with NO ( $k = 7.5 \cdot 10^{-12} \cdot \text{Exp}(290/T)$ ),  
 165 HO<sub>2</sub> ( $k = 5.2 \cdot 10^{-13} \cdot \text{Exp}(980/T)$ ), and RO<sub>2</sub> ( $k = 9.2 \cdot 10^{-14}$ ) were used mainly based MCM v3.3.1 and  
 166 the reference therein. And the data in panel (c) and (d) were obtained using box model with MCM according to the  
 167 initial conditions in this study.

168

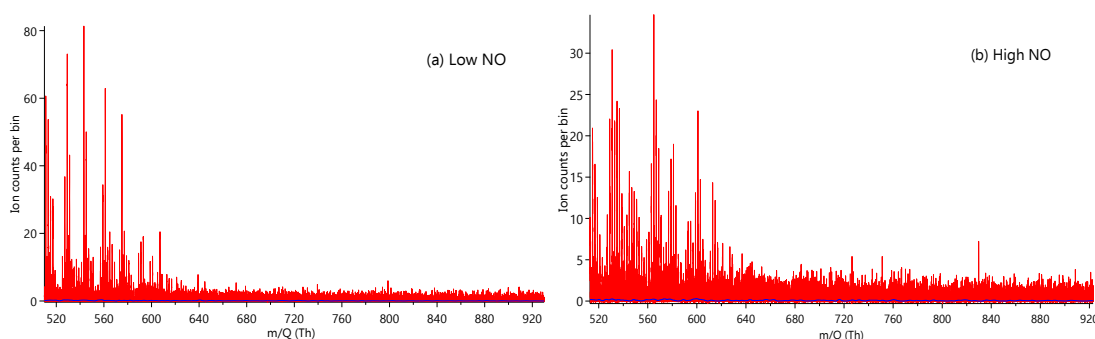

169

170 **Figure S4.** The average mass spectrum in the range of 520-920 Th at low and high NO over the first 15 min.

171

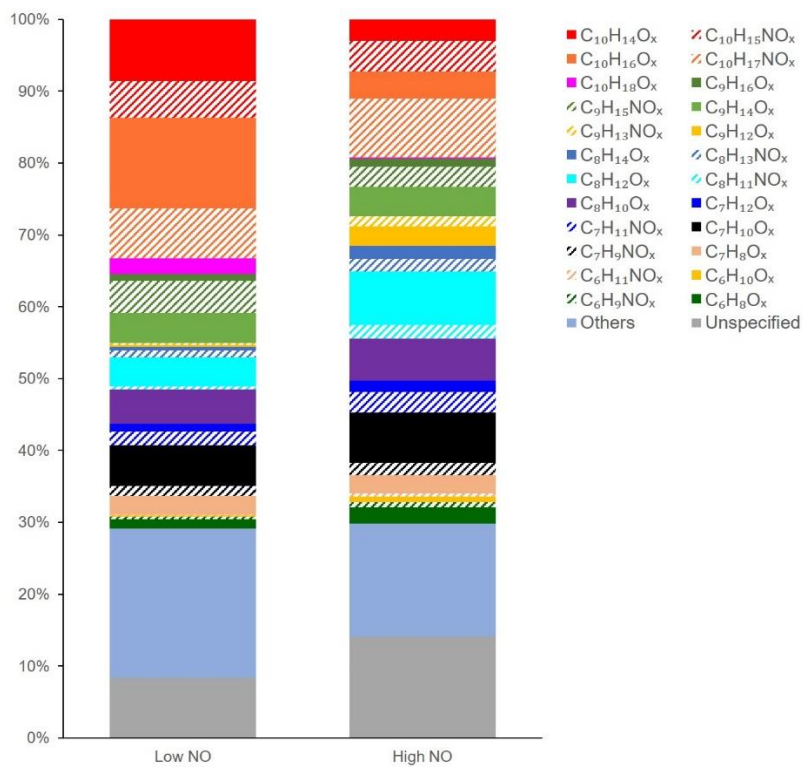

172

173 **Figure S5.** The contributions of different monomers formed in the oxidation of limonene by OH at 15 mins after the  
 174 start of the experiments. Others: identified compounds not being C<sub>6</sub>-C<sub>10</sub> monomers; Unspecified: compounds to  
 175 which specific elemental formula could not be attributed.

176

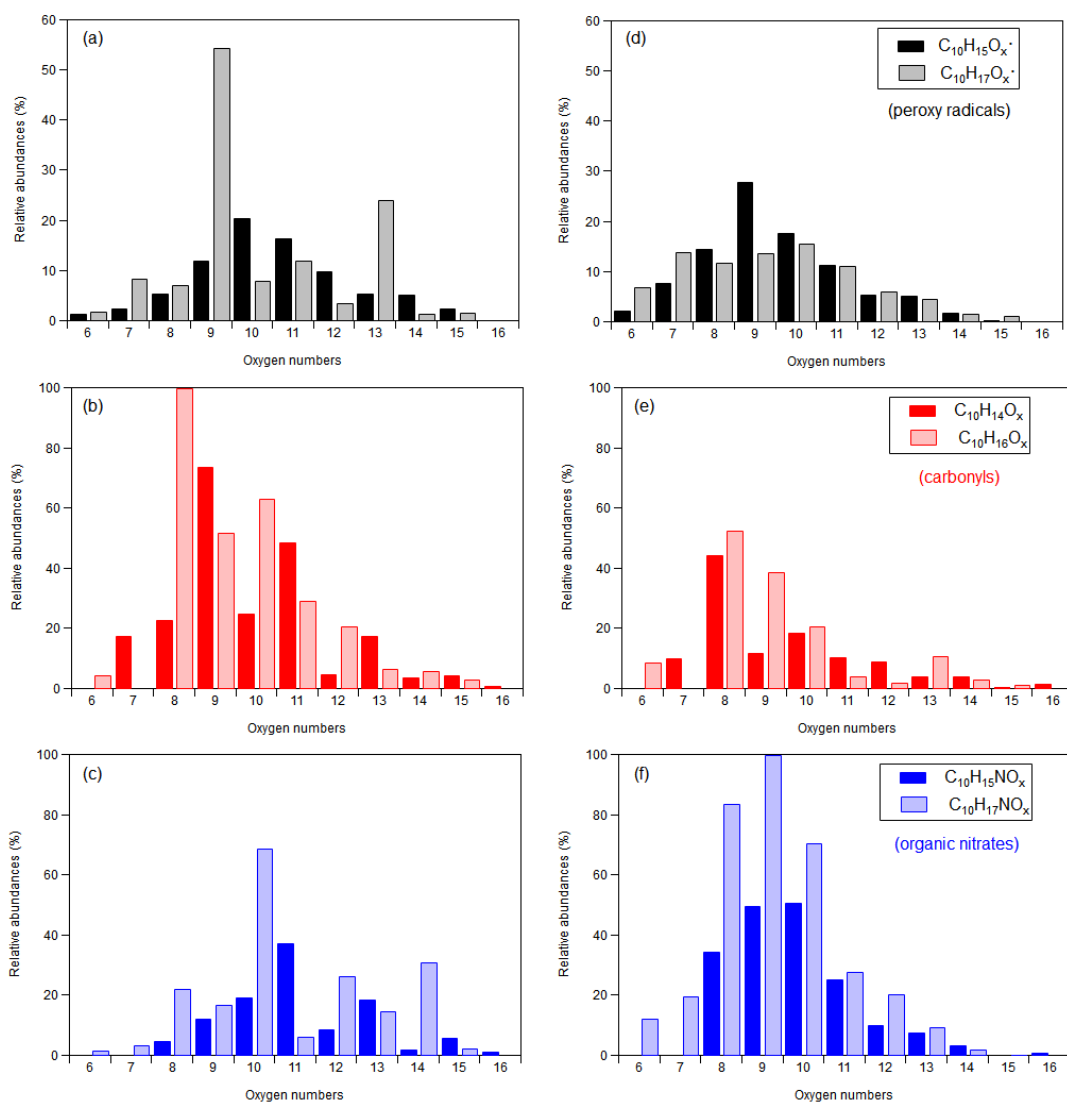

177  
 178  
 179  
 180  
 181  
 182  
 183  
 184  
 185

**Figure S6.** Relative abundances of individual products at low NO (0.06 - 0.1 ppb, panel a-c) and high NO (~17 ppb, panel d-f) at the first 15 min with the panels (a, d) showing  $C_{10}H_{15}O_x^\bullet$  (peroxy radicals, x=6-15) and  $C_{10}H_{17}O_x^\bullet$  (peroxy radicals, x=6-15) in black, the panels (b, e) showing  $C_{10}H_{14}O_x$  (carbonyls, x=7-16) and  $C_{10}H_{16}O_x$  (carbonyls, x=6, 8-15) in red, and the panels (c, f) showing  $C_{10}H_{15}NO_x$  (organic nitrates, x=8-16) and  $C_{10}H_{17}NO_x$  (organic nitrates, x=6-15) in blue.  $C_{10}H_{15}O_x^\bullet$  and their related products are in solid bars and  $C_{10}H_{17}O_x^\bullet$  and their related products are in transparent bars. The individual products are normalized to the signals the most abundant individual product respectively ( $C_{10}H_{16}O_8$  at low NO and  $C_{10}H_{17}NO_9$  at high NO).

186

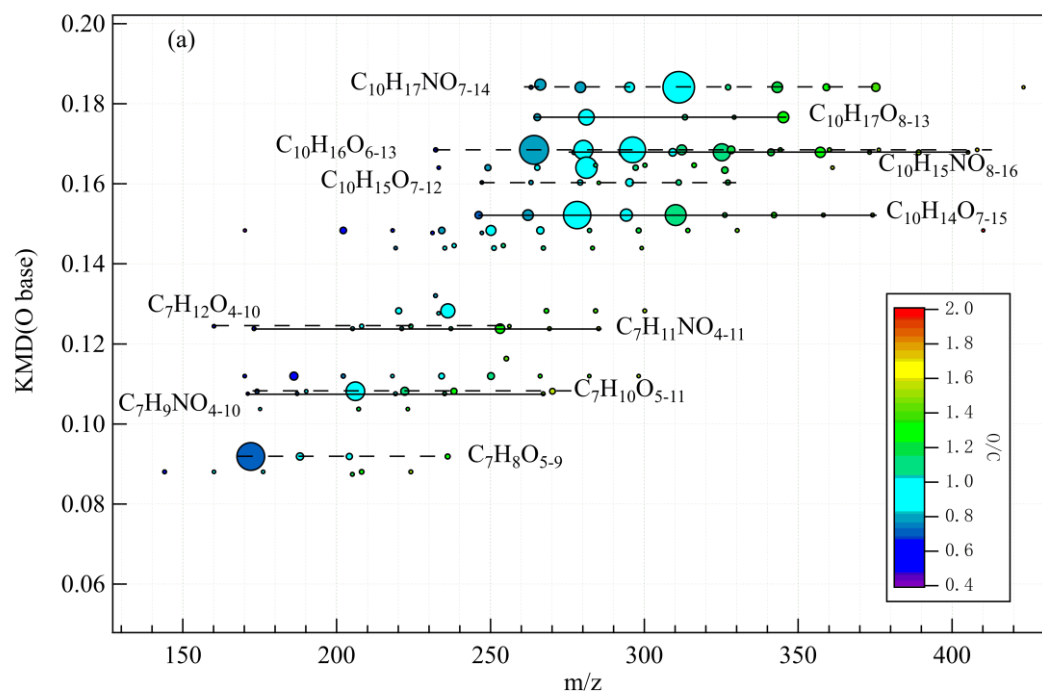

187

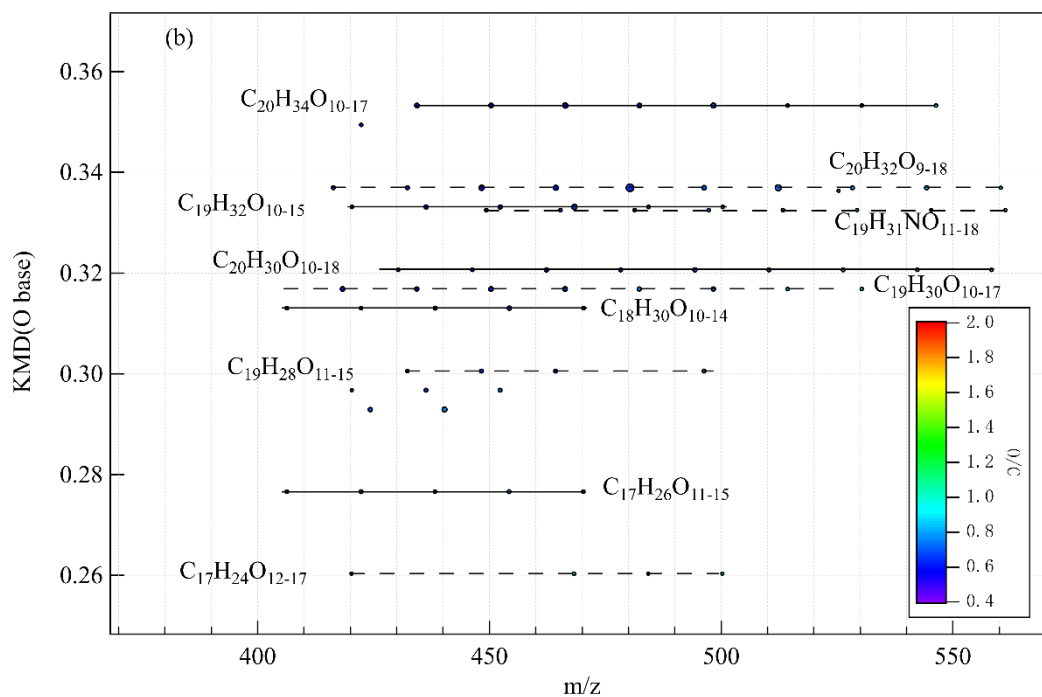

188

189 **Figure S7.** O-based Kendrick mass defect plot of (a) monomers and (b) dimers products at low NO. The area of the  
 190 circles is proportional to the average signal intensity of each peak during 15 min after the louvres opening. Dashed  
 191 lines mark the product families with organic nitrates; solid line mark the product families without nitrogen.

192

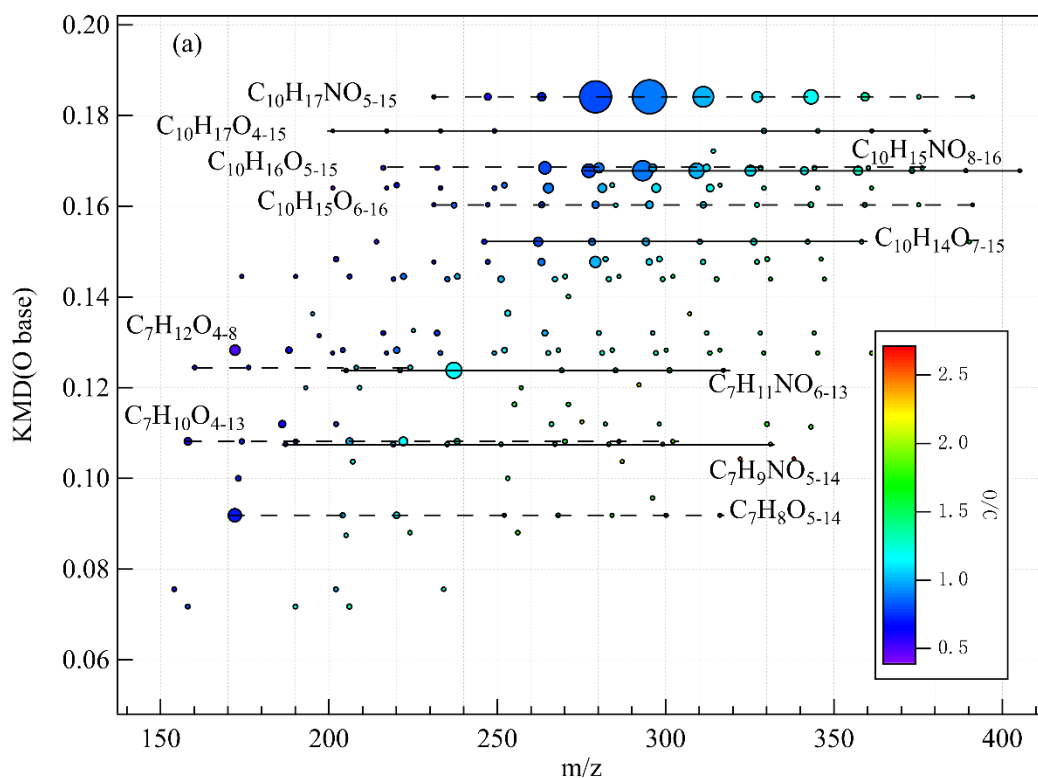

193

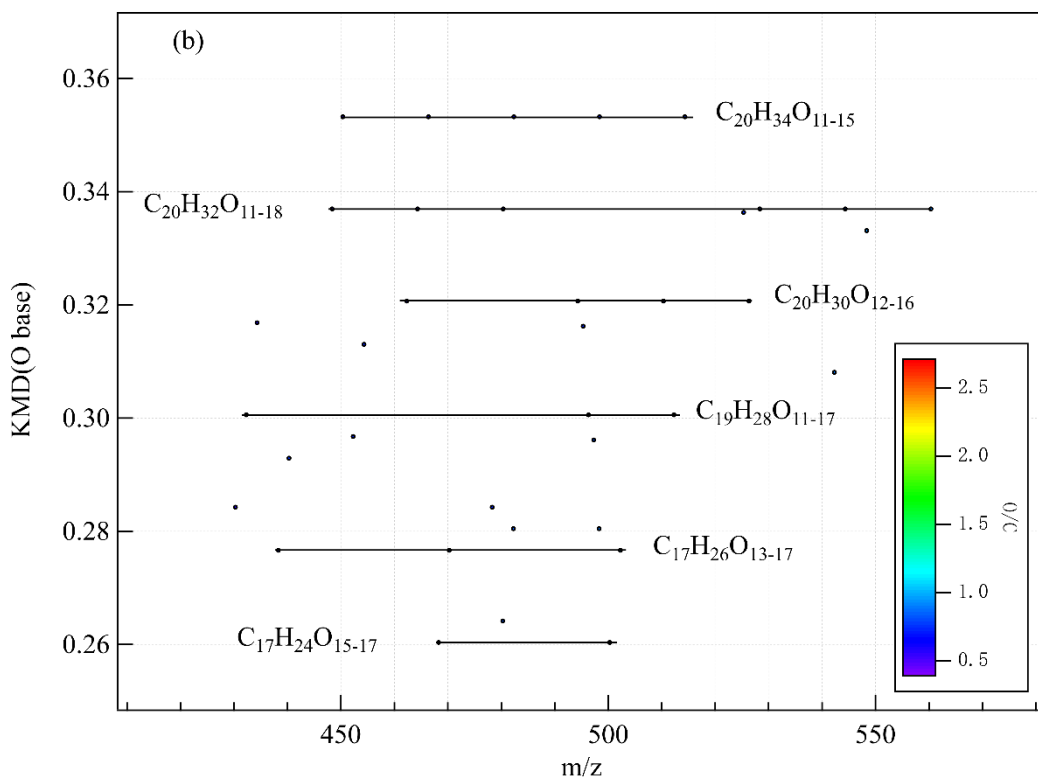

194

195 **Figure S8.** O-based Kendrick mass defect plot of (a) monomers and (b) dimers products at high NO. The area of  
 196 the circles is proportional to the average signal intensity of each peak during 15 min after the louvres opening. Solid  
 197 lines mark the products families.

198

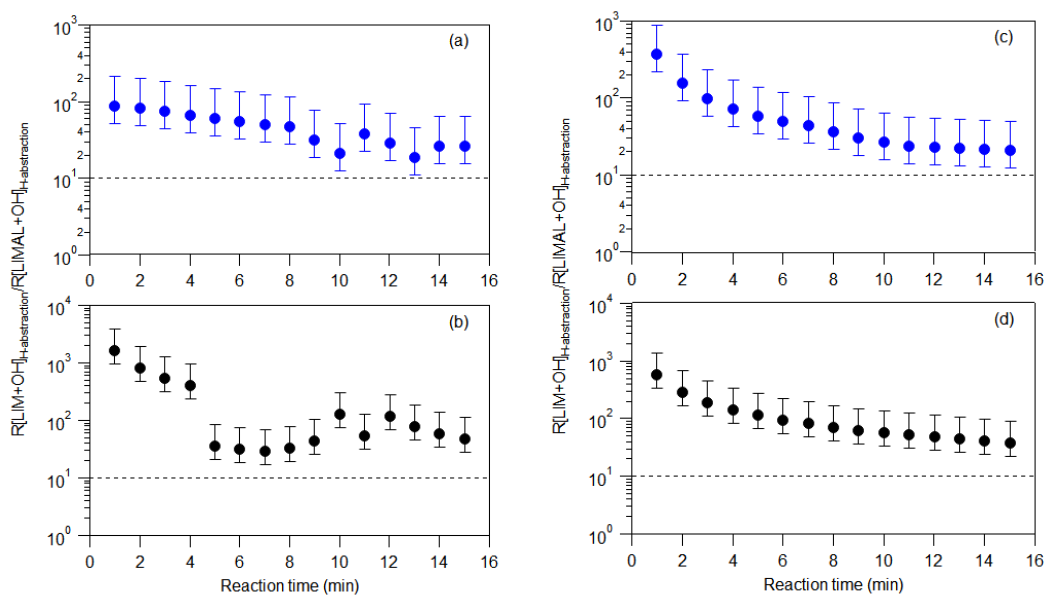

200

201 **Figure S9.** The relative ratio of hydrogen abstraction rate of the reaction limonene+OH to that of the reaction  
 202 limonaldehyde+OH within the first 15 min reaction time obtained from measured at low NO (a, c) and high NO (b,  
 203 d). Panels a-b and c-d show the results obtained from measured limonene concentration and limonaldehyde yield  
 204 and from MCM modeling, respectively. The dashed lines are at the value of 10 (i.e., ~10% contribution of secondary  
 205 chemistry). Note that different scales of y axes between panel (a, c) and (b, d). The large change in panel (b)  
 206 from the large measurement uncertainty of low accumulated limonene consumption measured by PTR-ToF-MS in  
 207 the first few minutes.

208

209

210 **Table S1-S10**211 **Table S1.** The experimental conditions in this study

| Exp.    | Limone added (ppb) | NO added (ppb) | OH (cm <sup>-3</sup> ) | RH  |
|---------|--------------------|----------------|------------------------|-----|
| Low NO  | 7                  | none           | 5.3*10 <sup>5</sup>    | 75% |
| High NO | 7                  | 17             | 2.2*10 <sup>5</sup>    | 75% |

212

213 **Table S2.** Relative average signal of C<sub>10</sub>H<sub>15</sub>O<sub>x</sub>• radicals and their termination products in low NO conditions. The  
 214 signal is each peak's average signal within the first 15 min of the experiment, normalized to that of C<sub>10</sub>H<sub>16</sub>O<sub>8</sub> as the  
 215 highest peak. "M", "M-17", "M-15" and "M+1" represent the molecular weight of the RO<sub>2</sub> and their termination  
 216 products with RO<sub>2</sub>, HO<sub>2</sub> and NO, respectively.

| RO <sub>2</sub>                                          | RC=O                                                      | ROH                                                      | ROOH                                                     | RONO <sub>2</sub>                                         |
|----------------------------------------------------------|-----------------------------------------------------------|----------------------------------------------------------|----------------------------------------------------------|-----------------------------------------------------------|
| C <sub>10</sub> H <sub>15</sub> O <sub>6</sub><br>1.4%   |                                                           |                                                          | C <sub>10</sub> H <sub>16</sub> O <sub>6</sub><br>4.6%   |                                                           |
| C <sub>10</sub> H <sub>15</sub> O <sub>7</sub><br>2.5%   |                                                           | C <sub>10</sub> H <sub>16</sub> O <sub>6</sub><br>4.6%   |                                                          | C <sub>10</sub> H <sub>15</sub> NO <sub>8</sub><br>5.0%   |
| C <sub>10</sub> H <sub>15</sub> O <sub>8</sub><br>5.5%   | C <sub>10</sub> H <sub>14</sub> O <sub>7</sub><br>17.7%   |                                                          | C <sub>10</sub> H <sub>16</sub> O <sub>8</sub><br>100%   | C <sub>10</sub> H <sub>15</sub> NO <sub>9</sub><br>12.3%  |
| C <sub>10</sub> H <sub>15</sub> O <sub>9</sub><br>12.1%  | C <sub>10</sub> H <sub>14</sub> O <sub>8</sub><br>22.8%   | C <sub>10</sub> H <sub>16</sub> O <sub>8</sub><br>100%   | C <sub>10</sub> H <sub>16</sub> O <sub>9</sub><br>51.9%  | C <sub>10</sub> H <sub>15</sub> NO <sub>10</sub><br>19.5% |
| C <sub>10</sub> H <sub>15</sub> O <sub>10</sub><br>20.3% | C <sub>10</sub> H <sub>14</sub> O <sub>9</sub><br>73.4%   | C <sub>10</sub> H <sub>16</sub> O <sub>9</sub><br>51.9%  | C <sub>10</sub> H <sub>16</sub> O <sub>10</sub><br>63.3% | C <sub>10</sub> H <sub>15</sub> NO <sub>11</sub><br>37.6% |
| C <sub>10</sub> H <sub>15</sub> O <sub>11</sub><br>16.5% | C <sub>10</sub> H <sub>14</sub> O <sub>10</sub><br>24.9%  | C <sub>10</sub> H <sub>16</sub> O <sub>10</sub><br>63.3% | C <sub>10</sub> H <sub>16</sub> O <sub>11</sub><br>29.4% | C <sub>10</sub> H <sub>15</sub> NO <sub>12</sub><br>8.8%  |
| C <sub>10</sub> H <sub>15</sub> O <sub>12</sub><br>9.9%  | C <sub>10</sub> H <sub>14</sub> O <sub>11</sub><br>48.8%  | C <sub>10</sub> H <sub>16</sub> O <sub>11</sub><br>29.4% | C <sub>10</sub> H <sub>16</sub> O <sub>12</sub><br>21.0% | C <sub>10</sub> H <sub>15</sub> NO <sub>13</sub><br>18.7% |
| C <sub>10</sub> H <sub>15</sub> O <sub>13</sub><br>5.6%  | C <sub>10</sub> H <sub>14</sub> O <sub>12</sub><br>4.9%   | C <sub>10</sub> H <sub>16</sub> O <sub>12</sub><br>21.0% | C <sub>10</sub> H <sub>16</sub> O <sub>13</sub><br>6.7%  | C <sub>10</sub> H <sub>15</sub> NO <sub>14</sub><br>2.2%  |
| C <sub>10</sub> H <sub>15</sub> O <sub>14</sub><br>5.4%  | C <sub>10</sub> H <sub>14</sub> O <sub>13</sub><br>17.84% | C <sub>10</sub> H <sub>16</sub> O <sub>13</sub><br>6.7%  | C <sub>10</sub> H <sub>16</sub> O <sub>14</sub><br>5.9%  | C <sub>10</sub> H <sub>15</sub> NO <sub>15</sub><br>5.9%  |
| C <sub>10</sub> H <sub>15</sub> O <sub>15</sub><br>2.5%  | C <sub>10</sub> H <sub>14</sub> O <sub>14</sub><br>3.8%   | C <sub>10</sub> H <sub>16</sub> O <sub>14</sub><br>5.9%  | C <sub>10</sub> H <sub>16</sub> O <sub>15</sub><br>3.1%  | C <sub>10</sub> H <sub>15</sub> NO <sub>16</sub><br>1.4%  |

217

218

219 **Table S3.** Relative average signal of C<sub>10</sub>H<sub>17</sub>O<sub>x</sub>• radicals and their termination products in low NO conditions. The  
 220 percentage value is the peak's average signal within the first 15 min of the experiment, relative to that of C<sub>10</sub>H<sub>16</sub>O<sub>8</sub>.  
 221 “M”, “M-17”, “M-15” and “M+1” represent the molecular weight of the RO<sub>2</sub> and their termination products with  
 222 RO<sub>2</sub>, HO<sub>2</sub> and NO, respectively.

| RO <sub>2</sub>                                          | RC=O                                                     | ROH                                                      | ROOH                                                     | RONO <sub>2</sub>                                         |
|----------------------------------------------------------|----------------------------------------------------------|----------------------------------------------------------|----------------------------------------------------------|-----------------------------------------------------------|
| C <sub>10</sub> H <sub>17</sub> O <sub>6</sub><br>1.9%   |                                                          |                                                          |                                                          | C <sub>10</sub> H <sub>17</sub> NO <sub>7</sub><br>3.6%   |
| C <sub>10</sub> H <sub>17</sub> O <sub>7</sub><br>8.6%   | C <sub>10</sub> H <sub>16</sub> O <sub>6</sub><br>4.6%   |                                                          |                                                          | C <sub>10</sub> H <sub>17</sub> NO <sub>8</sub><br>22.2%  |
| C <sub>10</sub> H <sub>17</sub> O <sub>8</sub><br>7.2%   |                                                          |                                                          | C <sub>10</sub> H <sub>18</sub> O <sub>8</sub><br>34.2%  | C <sub>10</sub> H <sub>17</sub> NO <sub>9</sub><br>16.9%  |
| C <sub>10</sub> H <sub>17</sub> O <sub>9</sub><br>54.4%  | C <sub>10</sub> H <sub>16</sub> O <sub>8</sub><br>100%   | C <sub>10</sub> H <sub>18</sub> O <sub>8</sub><br>34.2%  |                                                          | C <sub>10</sub> H <sub>17</sub> NO <sub>10</sub><br>69.1% |
| C <sub>10</sub> H <sub>17</sub> O <sub>10</sub><br>8.1%  | C <sub>10</sub> H <sub>16</sub> O <sub>9</sub><br>51.9%  |                                                          |                                                          | C <sub>10</sub> H <sub>17</sub> NO <sub>11</sub><br>6.3%  |
| C <sub>10</sub> H <sub>17</sub> O <sub>11</sub><br>12.0% | C <sub>10</sub> H <sub>16</sub> O <sub>10</sub><br>63.3% |                                                          |                                                          | C <sub>10</sub> H <sub>17</sub> NO <sub>12</sub><br>26.3% |
| C <sub>10</sub> H <sub>17</sub> O <sub>12</sub><br>3.7%  | C <sub>10</sub> H <sub>16</sub> O <sub>11</sub><br>29.4% |                                                          | C <sub>10</sub> H <sub>18</sub> O <sub>12</sub><br>17.0% | C <sub>10</sub> H <sub>17</sub> NO <sub>13</sub><br>14.7% |
| C <sub>10</sub> H <sub>17</sub> O <sub>13</sub><br>24.2% | C <sub>10</sub> H <sub>16</sub> O <sub>12</sub><br>21.0% | C <sub>10</sub> H <sub>18</sub> O <sub>12</sub><br>17.0% |                                                          | C <sub>10</sub> H <sub>17</sub> NO <sub>14</sub><br>31.0% |
| C <sub>10</sub> H <sub>17</sub> O <sub>14</sub><br>1.6%  | C <sub>10</sub> H <sub>16</sub> O <sub>13</sub><br>6.7%  |                                                          |                                                          | C <sub>10</sub> H <sub>17</sub> NO <sub>15</sub><br>2.6%  |
| C <sub>10</sub> H <sub>17</sub> O <sub>15</sub><br>1.7%  | C <sub>10</sub> H <sub>16</sub> O <sub>14</sub><br>5.9%  |                                                          |                                                          |                                                           |

223

224



**Table S4.** Identification of HOM monomers and dimers species at low NO.

| m/z      | Detected ion formula                                                              | Target molecule formula                                       |
|----------|-----------------------------------------------------------------------------------|---------------------------------------------------------------|
| 324.0186 | C <sub>5</sub> H <sub>11</sub> NO <sub>14</sub> [ <sup>15</sup> N]-               | C <sub>5</sub> H <sub>11</sub> NO <sub>11</sub>               |
| 387.0143 | C <sub>5</sub> H <sub>12</sub> N <sub>2</sub> O <sub>17</sub> [ <sup>15</sup> N]- | C <sub>5</sub> H <sub>12</sub> N <sub>2</sub> O <sub>14</sub> |
| 237.9971 | C <sub>5</sub> H <sub>5</sub> NO <sub>9</sub> [ <sup>15</sup> N]-                 | C <sub>5</sub> H <sub>5</sub> NO <sub>6</sub>                 |
| 253.0080 | C <sub>5</sub> H <sub>6</sub> N <sub>2</sub> O <sub>9</sub> [ <sup>15</sup> N]-   | C <sub>5</sub> H <sub>6</sub> N <sub>2</sub> O <sub>6</sub>   |
| 209.0069 | C <sub>5</sub> H <sub>6</sub> O <sub>8</sub> [ <sup>15</sup> N]-                  | C <sub>5</sub> H <sub>6</sub> O <sub>5</sub>                  |
| 225.0018 | C <sub>5</sub> H <sub>6</sub> O <sub>9</sub> [ <sup>15</sup> N]-                  | C <sub>5</sub> H <sub>6</sub> O <sub>6</sub>                  |
| 319.9873 | C <sub>5</sub> H <sub>7</sub> NO <sub>14</sub> [ <sup>15</sup> N]-                | C <sub>5</sub> H <sub>7</sub> NO <sub>11</sub>                |
| 211.0226 | C <sub>5</sub> H <sub>8</sub> O <sub>8</sub> [ <sup>15</sup> N]-                  | C <sub>5</sub> H <sub>8</sub> O <sub>5</sub>                  |
| 209.0433 | C <sub>6</sub> H <sub>10</sub> O <sub>7</sub> [ <sup>15</sup> N]-                 | C <sub>6</sub> H <sub>10</sub> O <sub>4</sub>                 |
| 320.0237 | C <sub>6</sub> H <sub>11</sub> NO <sub>13</sub> [ <sup>15</sup> N]-               | C <sub>6</sub> H <sub>11</sub> NO <sub>10</sub>               |
| 354.0292 | C <sub>6</sub> H <sub>13</sub> NO <sub>15</sub> [ <sup>15</sup> N]-               | C <sub>6</sub> H <sub>13</sub> NO <sub>12</sub>               |
| 202.0123 | C <sub>6</sub> H <sub>5</sub> NO <sub>6</sub> [ <sup>15</sup> N]-                 | C <sub>6</sub> H <sub>5</sub> NO <sub>3</sub>                 |
| 218.0073 | C <sub>6</sub> H <sub>5</sub> NO <sub>7</sub> [ <sup>15</sup> N]-                 | C <sub>6</sub> H <sub>5</sub> NO <sub>4</sub>                 |
| 249.9971 | C <sub>6</sub> H <sub>5</sub> NO <sub>9</sub> [ <sup>15</sup> N]-                 | C <sub>6</sub> H <sub>5</sub> NO <sub>6</sub>                 |
| 376.9724 | C <sub>6</sub> H <sub>6</sub> N <sub>2</sub> O <sub>16</sub> [ <sup>15</sup> N]-  | C <sub>6</sub> H <sub>6</sub> N <sub>2</sub> O <sub>13</sub>  |
| 284.9866 | C <sub>6</sub> H <sub>6</sub> O <sub>12</sub> [ <sup>15</sup> N]-                 | C <sub>6</sub> H <sub>6</sub> O <sub>9</sub>                  |
| 237.0018 | C <sub>6</sub> H <sub>6</sub> O <sub>9</sub> [ <sup>15</sup> N]-                  | C <sub>6</sub> H <sub>6</sub> O <sub>6</sub>                  |
| 268.0077 | C <sub>6</sub> H <sub>7</sub> NO <sub>10</sub> [ <sup>15</sup> N]-                | C <sub>6</sub> H <sub>7</sub> NO <sub>7</sub>                 |
| 284.0026 | C <sub>6</sub> H <sub>7</sub> NO <sub>11</sub> [ <sup>15</sup> N]-                | C <sub>6</sub> H <sub>7</sub> NO <sub>8</sub>                 |
| 252.0127 | C <sub>6</sub> H <sub>7</sub> NO <sub>9</sub> [ <sup>15</sup> N]-                 | C <sub>6</sub> H <sub>7</sub> NO <sub>6</sub>                 |
| 283.0186 | C <sub>6</sub> H <sub>8</sub> N <sub>2</sub> O <sub>10</sub> [ <sup>15</sup> N]-  | C <sub>6</sub> H <sub>8</sub> N <sub>2</sub> O <sub>7</sub>   |
| 299.0135 | C <sub>6</sub> H <sub>8</sub> N <sub>2</sub> O <sub>11</sub> [ <sup>15</sup> N]-  | C <sub>6</sub> H <sub>8</sub> N <sub>2</sub> O <sub>8</sub>   |
| 207.0277 | C <sub>6</sub> H <sub>8</sub> O <sub>7</sub> [ <sup>15</sup> N]-                  | C <sub>6</sub> H <sub>8</sub> O <sub>4</sub>                  |
| 223.0226 | C <sub>6</sub> H <sub>8</sub> O <sub>8</sub> [ <sup>15</sup> N]-                  | C <sub>6</sub> H <sub>8</sub> O <sub>5</sub>                  |
| 239.0175 | C <sub>6</sub> H <sub>8</sub> O <sub>9</sub> [ <sup>15</sup> N]-                  | C <sub>6</sub> H <sub>8</sub> O <sub>6</sub>                  |
| 271.0073 | C <sub>6</sub> H <sub>8</sub> O <sub>11</sub> [ <sup>15</sup> N]-                 | C <sub>6</sub> H <sub>8</sub> O <sub>8</sub>                  |
| 287.0022 | C <sub>6</sub> H <sub>8</sub> O <sub>12</sub> [ <sup>15</sup> N]-                 | C <sub>6</sub> H <sub>8</sub> O <sub>9</sub>                  |
| 238.0335 | C <sub>6</sub> H <sub>9</sub> NO <sub>8</sub> [ <sup>15</sup> N]-                 | C <sub>6</sub> H <sub>9</sub> NO <sub>5</sub>                 |
| 270.0233 | C <sub>6</sub> H <sub>9</sub> NO <sub>10</sub> [ <sup>15</sup> N]-                | C <sub>6</sub> H <sub>9</sub> NO <sub>7</sub>                 |
| 286.0182 | C <sub>6</sub> H <sub>9</sub> NO <sub>11</sub> [ <sup>15</sup> N]-                | C <sub>6</sub> H <sub>9</sub> NO <sub>8</sub>                 |
| 345.0189 | C <sub>7</sub> H <sub>10</sub> N <sub>2</sub> O <sub>13</sub> [ <sup>15</sup> N]- | C <sub>7</sub> H <sub>10</sub> N <sub>2</sub> O <sub>10</sub> |
| 408.9986 | C <sub>7</sub> H <sub>10</sub> N <sub>2</sub> O <sub>17</sub> [ <sup>15</sup> N]- | C <sub>7</sub> H <sub>10</sub> N <sub>2</sub> O <sub>14</sub> |
| 237.0382 | C <sub>7</sub> H <sub>10</sub> O <sub>8</sub> [ <sup>15</sup> N]-                 | C <sub>7</sub> H <sub>10</sub> O <sub>5</sub>                 |
| 253.0331 | C <sub>7</sub> H <sub>10</sub> O <sub>9</sub> [ <sup>15</sup> N]-                 | C <sub>7</sub> H <sub>10</sub> O <sub>6</sub>                 |
| 269.0281 | C <sub>7</sub> H <sub>10</sub> O <sub>10</sub> [ <sup>15</sup> N]-                | C <sub>7</sub> H <sub>10</sub> O <sub>7</sub>                 |
| 285.0230 | C <sub>7</sub> H <sub>10</sub> O <sub>11</sub> [ <sup>15</sup> N]-                | C <sub>7</sub> H <sub>10</sub> O <sub>8</sub>                 |
| 301.0179 | C <sub>7</sub> H <sub>10</sub> O <sub>12</sub> [ <sup>15</sup> N]-                | C <sub>7</sub> H <sub>10</sub> O <sub>9</sub>                 |
| 317.0128 | C <sub>7</sub> H <sub>10</sub> O <sub>13</sub> [ <sup>15</sup> N]-                | C <sub>7</sub> H <sub>10</sub> O <sub>10</sub>                |
| 333.0077 | C <sub>7</sub> H <sub>10</sub> O <sub>14</sub> [ <sup>15</sup> N]-                | C <sub>7</sub> H <sub>10</sub> O <sub>11</sub>                |
| 284.0390 | C <sub>7</sub> H <sub>11</sub> NO <sub>10</sub> [ <sup>15</sup> N]-               | C <sub>7</sub> H <sub>11</sub> NO <sub>7</sub>                |
| 300.0339 | C <sub>7</sub> H <sub>11</sub> NO <sub>11</sub> [ <sup>15</sup> N]-               | C <sub>7</sub> H <sub>11</sub> NO <sub>8</sub>                |

|          |                                                                                   |                                                               |
|----------|-----------------------------------------------------------------------------------|---------------------------------------------------------------|
| 316.0288 | C <sub>7</sub> H <sub>11</sub> NO <sub>12</sub> [ <sup>15</sup> N]-               | C <sub>7</sub> H <sub>11</sub> NO <sub>9</sub>                |
| 332.0237 | C <sub>7</sub> H <sub>11</sub> NO <sub>13</sub> [ <sup>15</sup> N]-               | C <sub>7</sub> H <sub>11</sub> NO <sub>10</sub>               |
| 348.0186 | C <sub>7</sub> H <sub>11</sub> NO <sub>14</sub> [ <sup>15</sup> N]-               | C <sub>7</sub> H <sub>11</sub> NO <sub>11</sub>               |
| 268.0440 | C <sub>7</sub> H <sub>11</sub> NO <sub>9</sub> [ <sup>15</sup> N]-                | C <sub>7</sub> H <sub>11</sub> NO <sub>6</sub>                |
| 333.0315 | C <sub>7</sub> H <sub>12</sub> NO <sub>13</sub> [ <sup>15</sup> N]-               | C <sub>7</sub> H <sub>12</sub> NO <sub>10</sub>               |
| 223.0590 | C <sub>7</sub> H <sub>12</sub> O <sub>7</sub> [ <sup>15</sup> N]-                 | C <sub>7</sub> H <sub>12</sub> O <sub>4</sub>                 |
| 239.0539 | C <sub>7</sub> H <sub>12</sub> O <sub>8</sub> [ <sup>15</sup> N]-                 | C <sub>7</sub> H <sub>12</sub> O <sub>5</sub>                 |
| 271.0437 | C <sub>7</sub> H <sub>12</sub> O <sub>10</sub> [ <sup>15</sup> N]-                | C <sub>7</sub> H <sub>12</sub> O <sub>7</sub>                 |
| 287.0386 | C <sub>7</sub> H <sub>12</sub> O <sub>11</sub> [ <sup>15</sup> N]-                | C <sub>7</sub> H <sub>12</sub> O <sub>8</sub>                 |
| 319.0284 | C <sub>7</sub> H <sub>12</sub> O <sub>13</sub> [ <sup>15</sup> N]-                | C <sub>7</sub> H <sub>12</sub> O <sub>10</sub>                |
| 217.0120 | C <sub>7</sub> H <sub>6</sub> O <sub>7</sub> [ <sup>15</sup> N]-                  | C <sub>7</sub> H <sub>6</sub> O <sub>4</sub>                  |
| 233.0069 | C <sub>7</sub> H <sub>6</sub> O <sub>8</sub> [ <sup>15</sup> N]-                  | C <sub>7</sub> H <sub>6</sub> O <sub>5</sub>                  |
| 235.0226 | C <sub>7</sub> H <sub>8</sub> O <sub>8</sub> [ <sup>15</sup> N]-                  | C <sub>7</sub> H <sub>8</sub> O <sub>5</sub>                  |
| 251.0175 | C <sub>7</sub> H <sub>8</sub> O <sub>9</sub> [ <sup>15</sup> N]-                  | C <sub>7</sub> H <sub>8</sub> O <sub>6</sub>                  |
| 267.0124 | C <sub>7</sub> H <sub>8</sub> O <sub>10</sub> [ <sup>15</sup> N]-                 | C <sub>7</sub> H <sub>8</sub> O <sub>7</sub>                  |
| 299.0022 | C <sub>7</sub> H <sub>8</sub> O <sub>12</sub> [ <sup>15</sup> N]-                 | C <sub>7</sub> H <sub>8</sub> O <sub>9</sub>                  |
| 378.9768 | C <sub>7</sub> H <sub>8</sub> O <sub>17</sub> [ <sup>15</sup> N]-                 | C <sub>7</sub> H <sub>8</sub> O <sub>14</sub>                 |
| 218.0436 | C <sub>7</sub> H <sub>9</sub> NO <sub>6</sub> [ <sup>15</sup> N]-                 | C <sub>7</sub> H <sub>9</sub> NO <sub>3</sub>                 |
| 234.0386 | C <sub>7</sub> H <sub>9</sub> NO <sub>7</sub> [ <sup>15</sup> N]-                 | C <sub>7</sub> H <sub>9</sub> NO <sub>4</sub>                 |
| 250.0335 | C <sub>7</sub> H <sub>9</sub> NO <sub>8</sub> [ <sup>15</sup> N]-                 | C <sub>7</sub> H <sub>9</sub> NO <sub>5</sub>                 |
| 282.0233 | C <sub>7</sub> H <sub>9</sub> NO <sub>10</sub> [ <sup>15</sup> N]-                | C <sub>7</sub> H <sub>9</sub> NO <sub>7</sub>                 |
| 298.0182 | C <sub>7</sub> H <sub>9</sub> NO <sub>11</sub> [ <sup>15</sup> N]-                | C <sub>7</sub> H <sub>9</sub> NO <sub>8</sub>                 |
| 314.0131 | C <sub>7</sub> H <sub>9</sub> NO <sub>12</sub> [ <sup>15</sup> N]-                | C <sub>7</sub> H <sub>9</sub> NO <sub>9</sub>                 |
| 330.0080 | C <sub>7</sub> H <sub>9</sub> NO <sub>13</sub> [ <sup>15</sup> N]-                | C <sub>7</sub> H <sub>9</sub> NO <sub>10</sub>                |
| 452.9884 | C <sub>8</sub> H <sub>10</sub> N <sub>2</sub> O <sub>19</sub> [ <sup>15</sup> N]- | C <sub>8</sub> H <sub>10</sub> N <sub>2</sub> O <sub>16</sub> |
| 233.0433 | C <sub>8</sub> H <sub>10</sub> O <sub>7</sub> [ <sup>15</sup> N]-                 | C <sub>8</sub> H <sub>10</sub> O <sub>4</sub>                 |
| 249.0382 | C <sub>8</sub> H <sub>10</sub> O <sub>8</sub> [ <sup>15</sup> N]-                 | C <sub>8</sub> H <sub>10</sub> O <sub>5</sub>                 |
| 265.0331 | C <sub>8</sub> H <sub>10</sub> O <sub>9</sub> [ <sup>15</sup> N]-                 | C <sub>8</sub> H <sub>10</sub> O <sub>6</sub>                 |
| 281.0281 | C <sub>8</sub> H <sub>10</sub> O <sub>10</sub> [ <sup>15</sup> N]-                | C <sub>8</sub> H <sub>10</sub> O <sub>7</sub>                 |
| 297.0230 | C <sub>8</sub> H <sub>10</sub> O <sub>11</sub> [ <sup>15</sup> N]-                | C <sub>8</sub> H <sub>10</sub> O <sub>8</sub>                 |
| 313.0179 | C <sub>8</sub> H <sub>10</sub> O <sub>12</sub> [ <sup>15</sup> N]-                | C <sub>8</sub> H <sub>10</sub> O <sub>9</sub>                 |
| 329.0128 | C <sub>8</sub> H <sub>10</sub> O <sub>13</sub> [ <sup>15</sup> N]-                | C <sub>8</sub> H <sub>10</sub> O <sub>10</sub>                |
| 361.0026 | C <sub>8</sub> H <sub>10</sub> O <sub>15</sub> [ <sup>15</sup> N]-                | C <sub>8</sub> H <sub>10</sub> O <sub>12</sub>                |
| 296.0390 | C <sub>8</sub> H <sub>11</sub> NO <sub>10</sub> [ <sup>15</sup> N]-               | C <sub>8</sub> H <sub>11</sub> NO <sub>7</sub>                |
| 312.0339 | C <sub>8</sub> H <sub>11</sub> NO <sub>11</sub> [ <sup>15</sup> N]-               | C <sub>8</sub> H <sub>11</sub> NO <sub>8</sub>                |
| 376.0135 | C <sub>8</sub> H <sub>11</sub> NO <sub>15</sub> [ <sup>15</sup> N]-               | C <sub>8</sub> H <sub>11</sub> NO <sub>12</sub>               |
| 378.0054 | C <sub>8</sub> H <sub>11</sub> O <sub>16</sub> [ <sup>15</sup> N]-                | C <sub>8</sub> H <sub>11</sub> O <sub>13</sub>                |
| 343.0397 | C <sub>8</sub> H <sub>12</sub> N <sub>2</sub> O <sub>12</sub> [ <sup>15</sup> N]- | C <sub>8</sub> H <sub>12</sub> N <sub>2</sub> O <sub>9</sub>  |
| 267.0488 | C <sub>8</sub> H <sub>12</sub> O <sub>9</sub> [ <sup>15</sup> N]-                 | C <sub>8</sub> H <sub>12</sub> O <sub>6</sub>                 |
| 283.0437 | C <sub>8</sub> H <sub>12</sub> O <sub>10</sub> [ <sup>15</sup> N]-                | C <sub>8</sub> H <sub>12</sub> O <sub>7</sub>                 |
| 299.0386 | C <sub>8</sub> H <sub>12</sub> O <sub>11</sub> [ <sup>15</sup> N]-                | C <sub>8</sub> H <sub>12</sub> O <sub>8</sub>                 |
| 331.0284 | C <sub>8</sub> H <sub>12</sub> O <sub>13</sub> [ <sup>15</sup> N]-                | C <sub>8</sub> H <sub>12</sub> O <sub>10</sub>                |
| 347.0234 | C <sub>8</sub> H <sub>12</sub> O <sub>14</sub> [ <sup>15</sup> N]-                | C <sub>8</sub> H <sub>12</sub> O <sub>11</sub>                |

|          |                                                                                   |                                                               |
|----------|-----------------------------------------------------------------------------------|---------------------------------------------------------------|
| 363.0183 | C <sub>8</sub> H <sub>12</sub> O <sub>15</sub> [ <sup>15</sup> N]-                | C <sub>8</sub> H <sub>12</sub> O <sub>12</sub>                |
| 282.0597 | C <sub>8</sub> H <sub>13</sub> NO <sub>9</sub> [ <sup>15</sup> N]-                | C <sub>8</sub> H <sub>13</sub> NO <sub>6</sub>                |
| 298.0546 | C <sub>8</sub> H <sub>13</sub> NO <sub>10</sub> [ <sup>15</sup> N]-               | C <sub>8</sub> H <sub>13</sub> NO <sub>7</sub>                |
| 314.0495 | C <sub>8</sub> H <sub>13</sub> NO <sub>11</sub> [ <sup>15</sup> N]-               | C <sub>8</sub> H <sub>13</sub> NO <sub>8</sub>                |
| 330.0444 | C <sub>8</sub> H <sub>13</sub> NO <sub>12</sub> [ <sup>15</sup> N]-               | C <sub>8</sub> H <sub>13</sub> NO <sub>9</sub>                |
| 346.0393 | C <sub>8</sub> H <sub>13</sub> NO <sub>13</sub> [ <sup>15</sup> N]-               | C <sub>8</sub> H <sub>13</sub> NO <sub>10</sub>               |
| 362.0343 | C <sub>8</sub> H <sub>13</sub> NO <sub>14</sub> [ <sup>15</sup> N]-               | C <sub>8</sub> H <sub>13</sub> NO <sub>11</sub>               |
| 301.0543 | C <sub>8</sub> H <sub>14</sub> O <sub>11</sub> [ <sup>15</sup> N]-                | C <sub>8</sub> H <sub>14</sub> O <sub>8</sub>                 |
| 317.0492 | C <sub>8</sub> H <sub>14</sub> O <sub>12</sub> [ <sup>15</sup> N]-                | C <sub>8</sub> H <sub>14</sub> O <sub>9</sub>                 |
| 316.0652 | C <sub>8</sub> H <sub>15</sub> NO <sub>11</sub> [ <sup>15</sup> N]-               | C <sub>8</sub> H <sub>15</sub> NO <sub>8</sub>                |
| 340.0288 | C <sub>9</sub> H <sub>11</sub> NO <sub>12</sub> [ <sup>15</sup> N]-               | C <sub>9</sub> H <sub>11</sub> NO <sub>9</sub>                |
| 355.0397 | C <sub>9</sub> H <sub>12</sub> N <sub>2</sub> O <sub>12</sub> [ <sup>15</sup> N]- | C <sub>9</sub> H <sub>12</sub> N <sub>2</sub> O <sub>9</sub>  |
| 295.0437 | C <sub>9</sub> H <sub>12</sub> O <sub>10</sub> [ <sup>15</sup> N]-                | C <sub>9</sub> H <sub>12</sub> O <sub>7</sub>                 |
| 454.9929 | C <sub>9</sub> H <sub>12</sub> O <sub>20</sub> [ <sup>15</sup> N]-                | C <sub>9</sub> H <sub>12</sub> O <sub>17</sub>                |
| 310.0546 | C <sub>9</sub> H <sub>13</sub> NO <sub>10</sub> [ <sup>15</sup> N]-               | C <sub>9</sub> H <sub>13</sub> NO <sub>7</sub>                |
| 294.0597 | C <sub>9</sub> H <sub>13</sub> NO <sub>9</sub> [ <sup>15</sup> N]-                | C <sub>9</sub> H <sub>13</sub> NO <sub>6</sub>                |
| 389.0452 | C <sub>9</sub> H <sub>14</sub> N <sub>2</sub> O <sub>14</sub> [ <sup>15</sup> N]- | C <sub>9</sub> H <sub>14</sub> N <sub>2</sub> O <sub>11</sub> |
| 405.0401 | C <sub>9</sub> H <sub>14</sub> N <sub>2</sub> O <sub>15</sub> [ <sup>15</sup> N]- | C <sub>9</sub> H <sub>14</sub> N <sub>2</sub> O <sub>12</sub> |
| 437.0299 | C <sub>9</sub> H <sub>14</sub> N <sub>2</sub> O <sub>17</sub> [ <sup>15</sup> N]- | C <sub>9</sub> H <sub>14</sub> N <sub>2</sub> O <sub>14</sub> |
| 233.0797 | C <sub>9</sub> H <sub>14</sub> O <sub>6</sub> [ <sup>15</sup> N]-                 | C <sub>9</sub> H <sub>14</sub> O <sub>3</sub>                 |
| 265.0695 | C <sub>9</sub> H <sub>14</sub> O <sub>8</sub> [ <sup>15</sup> N]-                 | C <sub>9</sub> H <sub>14</sub> O <sub>5</sub>                 |
| 281.0644 | C <sub>9</sub> H <sub>14</sub> O <sub>9</sub> [ <sup>15</sup> N]-                 | C <sub>9</sub> H <sub>14</sub> O <sub>6</sub>                 |
| 297.0594 | C <sub>9</sub> H <sub>14</sub> O <sub>10</sub> [ <sup>15</sup> N]-                | C <sub>9</sub> H <sub>14</sub> O <sub>7</sub>                 |
| 313.0543 | C <sub>9</sub> H <sub>14</sub> O <sub>11</sub> [ <sup>15</sup> N]-                | C <sub>9</sub> H <sub>14</sub> O <sub>8</sub>                 |
| 329.0492 | C <sub>9</sub> H <sub>14</sub> O <sub>12</sub> [ <sup>15</sup> N]-                | C <sub>9</sub> H <sub>14</sub> O <sub>9</sub>                 |
| 361.0390 | C <sub>9</sub> H <sub>14</sub> O <sub>14</sub> [ <sup>15</sup> N]-                | C <sub>9</sub> H <sub>14</sub> O <sub>11</sub>                |
| 377.0339 | C <sub>9</sub> H <sub>14</sub> O <sub>15</sub> [ <sup>15</sup> N]-                | C <sub>9</sub> H <sub>14</sub> O <sub>12</sub>                |
| 473.0034 | C <sub>9</sub> H <sub>14</sub> O <sub>21</sub> [ <sup>15</sup> N]-                | C <sub>9</sub> H <sub>14</sub> O <sub>18</sub>                |
| 296.0753 | C <sub>9</sub> H <sub>15</sub> NO <sub>9</sub> [ <sup>15</sup> N]-                | C <sub>9</sub> H <sub>15</sub> NO <sub>6</sub>                |
| 312.0703 | C <sub>9</sub> H <sub>15</sub> NO <sub>10</sub> [ <sup>15</sup> N]-               | C <sub>9</sub> H <sub>15</sub> NO <sub>7</sub>                |
| 328.0652 | C <sub>9</sub> H <sub>15</sub> NO <sub>11</sub> [ <sup>15</sup> N]-               | C <sub>9</sub> H <sub>15</sub> NO <sub>8</sub>                |
| 344.0601 | C <sub>9</sub> H <sub>15</sub> NO <sub>12</sub> [ <sup>15</sup> N]-               | C <sub>9</sub> H <sub>15</sub> NO <sub>9</sub>                |
| 360.0550 | C <sub>9</sub> H <sub>15</sub> NO <sub>13</sub> [ <sup>15</sup> N]-               | C <sub>9</sub> H <sub>15</sub> NO <sub>10</sub>               |
| 424.0347 | C <sub>9</sub> H <sub>15</sub> NO <sub>17</sub> [ <sup>15</sup> N]-               | C <sub>9</sub> H <sub>15</sub> NO <sub>14</sub>               |
| 407.0557 | C <sub>9</sub> H <sub>16</sub> N <sub>2</sub> O <sub>15</sub> [ <sup>15</sup> N]- | C <sub>9</sub> H <sub>16</sub> N <sub>2</sub> O <sub>12</sub> |
| 331.0648 | C <sub>9</sub> H <sub>16</sub> O <sub>12</sub> [ <sup>15</sup> N]-                | C <sub>9</sub> H <sub>16</sub> O <sub>9</sub>                 |
| 347.0597 | C <sub>9</sub> H <sub>16</sub> O <sub>13</sub> [ <sup>15</sup> N]-                | C <sub>9</sub> H <sub>16</sub> O <sub>10</sub>                |
| 363.0547 | C <sub>9</sub> H <sub>16</sub> O <sub>14</sub> [ <sup>15</sup> N]-                | C <sub>9</sub> H <sub>16</sub> O <sub>11</sub>                |
| 379.0496 | C <sub>9</sub> H <sub>16</sub> O <sub>15</sub> [ <sup>15</sup> N]-                | C <sub>9</sub> H <sub>16</sub> O <sub>12</sub>                |
| 362.0706 | C <sub>9</sub> H <sub>17</sub> NO <sub>13</sub> [ <sup>15</sup> N]-               | C <sub>9</sub> H <sub>17</sub> NO <sub>10</sub>               |
| 361.0866 | C <sub>9</sub> H <sub>18</sub> N <sub>2</sub> O <sub>12</sub> [ <sup>15</sup> N]- | C <sub>9</sub> H <sub>18</sub> N <sub>2</sub> O <sub>9</sub>  |
| 377.0815 | C <sub>9</sub> H <sub>18</sub> N <sub>2</sub> O <sub>13</sub> [ <sup>15</sup> N]- | C <sub>9</sub> H <sub>18</sub> N <sub>2</sub> O <sub>10</sub> |
| 409.0714 | C <sub>9</sub> H <sub>18</sub> N <sub>2</sub> O <sub>15</sub> [ <sup>15</sup> N]- | C <sub>9</sub> H <sub>18</sub> N <sub>2</sub> O <sub>12</sub> |

|          |                                                                                    |                                                                |
|----------|------------------------------------------------------------------------------------|----------------------------------------------------------------|
| 309.0594 | C <sub>10</sub> H <sub>14</sub> O <sub>10</sub> [ <sup>15</sup> N]-                | C <sub>10</sub> H <sub>14</sub> O <sub>7</sub>                 |
| 325.0543 | C <sub>10</sub> H <sub>14</sub> O <sub>11</sub> [ <sup>15</sup> N]-                | C <sub>10</sub> H <sub>14</sub> O <sub>8</sub>                 |
| 341.0492 | C <sub>10</sub> H <sub>14</sub> O <sub>12</sub> [ <sup>15</sup> N]-                | C <sub>10</sub> H <sub>14</sub> O <sub>9</sub>                 |
| 357.0441 | C <sub>10</sub> H <sub>14</sub> O <sub>13</sub> [ <sup>15</sup> N]-                | C <sub>10</sub> H <sub>14</sub> O <sub>10</sub>                |
| 373.0390 | C <sub>10</sub> H <sub>14</sub> O <sub>14</sub> [ <sup>15</sup> N]-                | C <sub>10</sub> H <sub>14</sub> O <sub>11</sub>                |
| 389.0339 | C <sub>10</sub> H <sub>14</sub> O <sub>15</sub> [ <sup>15</sup> N]-                | C <sub>10</sub> H <sub>14</sub> O <sub>12</sub>                |
| 469.0085 | C <sub>10</sub> H <sub>14</sub> O <sub>20</sub> [ <sup>15</sup> N]-                | C <sub>10</sub> H <sub>14</sub> O <sub>17</sub>                |
| 324.0703 | C <sub>10</sub> H <sub>15</sub> NO <sub>10</sub> [ <sup>15</sup> N]-               | C <sub>10</sub> H <sub>15</sub> NO <sub>7</sub>                |
| 340.0652 | C <sub>10</sub> H <sub>15</sub> NO <sub>11</sub> [ <sup>15</sup> N]-               | C <sub>10</sub> H <sub>15</sub> NO <sub>8</sub>                |
| 356.0601 | C <sub>10</sub> H <sub>15</sub> NO <sub>12</sub> [ <sup>15</sup> N]-               | C <sub>10</sub> H <sub>15</sub> NO <sub>9</sub>                |
| 372.0550 | C <sub>10</sub> H <sub>15</sub> NO <sub>13</sub> [ <sup>15</sup> N]-               | C <sub>10</sub> H <sub>15</sub> NO <sub>10</sub>               |
| 388.0499 | C <sub>10</sub> H <sub>15</sub> NO <sub>14</sub> [ <sup>15</sup> N]-               | C <sub>10</sub> H <sub>15</sub> NO <sub>11</sub>               |
| 404.0448 | C <sub>10</sub> H <sub>15</sub> NO <sub>15</sub> [ <sup>15</sup> N]-               | C <sub>10</sub> H <sub>15</sub> NO <sub>12</sub>               |
| 420.0397 | C <sub>10</sub> H <sub>15</sub> NO <sub>16</sub> [ <sup>15</sup> N]-               | C <sub>10</sub> H <sub>15</sub> NO <sub>13</sub>               |
| 436.0347 | C <sub>10</sub> H <sub>15</sub> NO <sub>17</sub> [ <sup>15</sup> N]-               | C <sub>10</sub> H <sub>15</sub> NO <sub>14</sub>               |
| 452.0296 | C <sub>10</sub> H <sub>15</sub> NO <sub>18</sub> [ <sup>15</sup> N]-               | C <sub>10</sub> H <sub>15</sub> NO <sub>15</sub>               |
| 468.0245 | C <sub>10</sub> H <sub>15</sub> NO <sub>19</sub> [ <sup>15</sup> N]-               | C <sub>10</sub> H <sub>15</sub> NO <sub>16</sub>               |
| 310.0672 | C <sub>10</sub> H <sub>15</sub> O <sub>10</sub> [ <sup>15</sup> N]-                | C <sub>10</sub> H <sub>15</sub> O <sub>7</sub>                 |
| 326.0621 | C <sub>10</sub> H <sub>15</sub> O <sub>11</sub> [ <sup>15</sup> N]-                | C <sub>10</sub> H <sub>15</sub> O <sub>8</sub>                 |
| 342.0570 | C <sub>10</sub> H <sub>15</sub> O <sub>12</sub> [ <sup>15</sup> N]-                | C <sub>10</sub> H <sub>15</sub> O <sub>9</sub>                 |
| 358.0519 | C <sub>10</sub> H <sub>15</sub> O <sub>13</sub> [ <sup>15</sup> N]-                | C <sub>10</sub> H <sub>15</sub> O <sub>10</sub>                |
| 374.0468 | C <sub>10</sub> H <sub>15</sub> O <sub>14</sub> [ <sup>15</sup> N]-                | C <sub>10</sub> H <sub>15</sub> O <sub>11</sub>                |
| 390.0418 | C <sub>10</sub> H <sub>15</sub> O <sub>15</sub> [ <sup>15</sup> N]-                | C <sub>10</sub> H <sub>15</sub> O <sub>12</sub>                |
| 435.0506 | C <sub>10</sub> H <sub>16</sub> N <sub>2</sub> O <sub>16</sub> [ <sup>15</sup> N]- | C <sub>10</sub> H <sub>16</sub> N <sub>2</sub> O <sub>13</sub> |
| 295.0801 | C <sub>10</sub> H <sub>16</sub> O <sub>9</sub> [ <sup>15</sup> N]-                 | C <sub>10</sub> H <sub>16</sub> O <sub>6</sub>                 |
| 327.0699 | C <sub>10</sub> H <sub>16</sub> O <sub>11</sub> [ <sup>15</sup> N]-                | C <sub>10</sub> H <sub>16</sub> O <sub>8</sub>                 |
| 343.0648 | C <sub>10</sub> H <sub>16</sub> O <sub>12</sub> [ <sup>15</sup> N]-                | C <sub>10</sub> H <sub>16</sub> O <sub>9</sub>                 |
| 359.0597 | C <sub>10</sub> H <sub>16</sub> O <sub>13</sub> [ <sup>15</sup> N]-                | C <sub>10</sub> H <sub>16</sub> O <sub>10</sub>                |
| 375.0547 | C <sub>10</sub> H <sub>16</sub> O <sub>14</sub> [ <sup>15</sup> N]-                | C <sub>10</sub> H <sub>16</sub> O <sub>11</sub>                |
| 391.0496 | C <sub>10</sub> H <sub>16</sub> O <sub>15</sub> [ <sup>15</sup> N]-                | C <sub>10</sub> H <sub>16</sub> O <sub>12</sub>                |
| 407.0445 | C <sub>10</sub> H <sub>16</sub> O <sub>16</sub> [ <sup>15</sup> N]-                | C <sub>10</sub> H <sub>16</sub> O <sub>13</sub>                |
| 423.0394 | C <sub>10</sub> H <sub>16</sub> O <sub>17</sub> [ <sup>15</sup> N]-                | C <sub>10</sub> H <sub>16</sub> O <sub>14</sub>                |
| 439.0343 | C <sub>10</sub> H <sub>16</sub> O <sub>18</sub> [ <sup>15</sup> N]-                | C <sub>10</sub> H <sub>16</sub> O <sub>15</sub>                |
| 326.0859 | C <sub>10</sub> H <sub>17</sub> NO <sub>10</sub> [ <sup>15</sup> N]-               | C <sub>10</sub> H <sub>17</sub> NO <sub>7</sub>                |
| 342.0808 | C <sub>10</sub> H <sub>17</sub> NO <sub>11</sub> [ <sup>15</sup> N]-               | C <sub>10</sub> H <sub>17</sub> NO <sub>8</sub>                |
| 358.0757 | C <sub>10</sub> H <sub>17</sub> NO <sub>12</sub> [ <sup>15</sup> N]-               | C <sub>10</sub> H <sub>17</sub> NO <sub>9</sub>                |
| 374.0706 | C <sub>10</sub> H <sub>17</sub> NO <sub>13</sub> [ <sup>15</sup> N]-               | C <sub>10</sub> H <sub>17</sub> NO <sub>10</sub>               |
| 390.0656 | C <sub>10</sub> H <sub>17</sub> NO <sub>14</sub> [ <sup>15</sup> N]-               | C <sub>10</sub> H <sub>17</sub> NO <sub>11</sub>               |
| 406.0605 | C <sub>10</sub> H <sub>17</sub> NO <sub>15</sub> [ <sup>15</sup> N]-               | C <sub>10</sub> H <sub>17</sub> NO <sub>12</sub>               |
| 422.0554 | C <sub>10</sub> H <sub>17</sub> NO <sub>16</sub> [ <sup>15</sup> N]-               | C <sub>10</sub> H <sub>17</sub> NO <sub>13</sub>               |
| 328.0777 | C <sub>10</sub> H <sub>17</sub> O <sub>11</sub> [ <sup>15</sup> N]-                | C <sub>10</sub> H <sub>17</sub> O <sub>8</sub>                 |
| 344.0727 | C <sub>10</sub> H <sub>17</sub> O <sub>12</sub> [ <sup>15</sup> N]-                | C <sub>10</sub> H <sub>17</sub> O <sub>9</sub>                 |
| 376.0625 | C <sub>10</sub> H <sub>17</sub> O <sub>14</sub> [ <sup>15</sup> N]-                | C <sub>10</sub> H <sub>17</sub> O <sub>11</sub>                |

|          |                                                                                    |                                                                |
|----------|------------------------------------------------------------------------------------|----------------------------------------------------------------|
| 392.0574 | C <sub>10</sub> H <sub>17</sub> O <sub>15</sub> [ <sup>15</sup> N]-                | C <sub>10</sub> H <sub>17</sub> O <sub>12</sub>                |
| 408.0523 | C <sub>10</sub> H <sub>17</sub> O <sub>16</sub> [ <sup>15</sup> N]-                | C <sub>10</sub> H <sub>17</sub> O <sub>13</sub>                |
| 357.0917 | C <sub>10</sub> H <sub>18</sub> N <sub>2</sub> O <sub>11</sub> [ <sup>15</sup> N]- | C <sub>10</sub> H <sub>18</sub> N <sub>2</sub> O <sub>8</sub>  |
| 421.0714 | C <sub>10</sub> H <sub>18</sub> N <sub>2</sub> O <sub>15</sub> [ <sup>15</sup> N]- | C <sub>10</sub> H <sub>18</sub> N <sub>2</sub> O <sub>12</sub> |
| 453.0612 | C <sub>10</sub> H <sub>18</sub> N <sub>2</sub> O <sub>17</sub> [ <sup>15</sup> N]- | C <sub>10</sub> H <sub>18</sub> N <sub>2</sub> O <sub>14</sub> |
| 329.0856 | C <sub>10</sub> H <sub>18</sub> O <sub>11</sub> [ <sup>15</sup> N]-                | C <sub>10</sub> H <sub>18</sub> O <sub>8</sub>                 |
| 393.0652 | C <sub>10</sub> H <sub>18</sub> O <sub>15</sub> [ <sup>15</sup> N]-                | C <sub>10</sub> H <sub>18</sub> O <sub>12</sub>                |
| 493.1177 | C <sub>15</sub> H <sub>26</sub> O <sub>17</sub> [ <sup>15</sup> N]-                | C <sub>15</sub> H <sub>26</sub> O <sub>14</sub>                |
| 479.1384 | C <sub>15</sub> H <sub>28</sub> O <sub>16</sub> [ <sup>15</sup> N]-                | C <sub>15</sub> H <sub>28</sub> O <sub>13</sub>                |
| 495.1333 | C <sub>15</sub> H <sub>28</sub> O <sub>17</sub> [ <sup>15</sup> N]-                | C <sub>15</sub> H <sub>28</sub> O <sub>14</sub>                |
| 486.1231 | C <sub>16</sub> H <sub>25</sub> NO <sub>15</sub> [ <sup>15</sup> N]-               | C <sub>16</sub> H <sub>25</sub> NO <sub>12</sub>               |
| 473.1278 | C <sub>16</sub> H <sub>26</sub> O <sub>15</sub> [ <sup>15</sup> N]-                | C <sub>16</sub> H <sub>26</sub> O <sub>12</sub>                |
| 525.1439 | C <sub>16</sub> H <sub>30</sub> O <sub>18</sub> [ <sup>15</sup> N]-                | C <sub>16</sub> H <sub>30</sub> O <sub>15</sub>                |
| 541.1388 | C <sub>16</sub> H <sub>30</sub> O <sub>19</sub> [ <sup>15</sup> N]-                | C <sub>16</sub> H <sub>30</sub> O <sub>16</sub>                |
| 572.1446 | C <sub>16</sub> H <sub>31</sub> NO <sub>20</sub> [ <sup>15</sup> N]-               | C <sub>16</sub> H <sub>31</sub> NO <sub>17</sub>               |
| 543.1544 | C <sub>16</sub> H <sub>32</sub> O <sub>19</sub> [ <sup>15</sup> N]-                | C <sub>16</sub> H <sub>32</sub> O <sub>16</sub>                |
| 591.1392 | C <sub>16</sub> H <sub>32</sub> O <sub>22</sub> [ <sup>15</sup> N]-                | C <sub>16</sub> H <sub>32</sub> O <sub>19</sub>                |
| 623.1290 | C <sub>16</sub> H <sub>32</sub> O <sub>24</sub> [ <sup>15</sup> N]-                | C <sub>16</sub> H <sub>32</sub> O <sub>21</sub>                |
| 574.1603 | C <sub>16</sub> H <sub>33</sub> NO <sub>20</sub> [ <sup>15</sup> N]-               | C <sub>16</sub> H <sub>33</sub> NO <sub>17</sub>               |
| 590.1552 | C <sub>16</sub> H <sub>33</sub> NO <sub>21</sub> [ <sup>15</sup> N]-               | C <sub>16</sub> H <sub>33</sub> NO <sub>18</sub>               |
| 606.1501 | C <sub>16</sub> H <sub>33</sub> NO <sub>22</sub> [ <sup>15</sup> N]-               | C <sub>16</sub> H <sub>33</sub> NO <sub>19</sub>               |
| 622.1450 | C <sub>16</sub> H <sub>33</sub> NO <sub>23</sub> [ <sup>15</sup> N]-               | C <sub>16</sub> H <sub>33</sub> NO <sub>20</sub>               |
| 483.1122 | C <sub>17</sub> H <sub>24</sub> O <sub>15</sub> [ <sup>15</sup> N]-                | C <sub>17</sub> H <sub>24</sub> O <sub>12</sub>                |
| 531.0969 | C <sub>17</sub> H <sub>24</sub> O <sub>18</sub> [ <sup>15</sup> N]-                | C <sub>17</sub> H <sub>24</sub> O <sub>15</sub>                |
| 547.0918 | C <sub>17</sub> H <sub>24</sub> O <sub>19</sub> [ <sup>15</sup> N]-                | C <sub>17</sub> H <sub>24</sub> O <sub>16</sub>                |
| 563.0868 | C <sub>17</sub> H <sub>24</sub> O <sub>20</sub> [ <sup>15</sup> N]-                | C <sub>17</sub> H <sub>24</sub> O <sub>17</sub>                |
| 469.1329 | C <sub>17</sub> H <sub>26</sub> O <sub>14</sub> [ <sup>15</sup> N]-                | C <sub>17</sub> H <sub>26</sub> O <sub>11</sub>                |
| 485.1278 | C <sub>17</sub> H <sub>26</sub> O <sub>15</sub> [ <sup>15</sup> N]-                | C <sub>17</sub> H <sub>26</sub> O <sub>12</sub>                |
| 501.1227 | C <sub>17</sub> H <sub>26</sub> O <sub>16</sub> [ <sup>15</sup> N]-                | C <sub>17</sub> H <sub>26</sub> O <sub>13</sub>                |
| 517.1177 | C <sub>17</sub> H <sub>26</sub> O <sub>17</sub> [ <sup>15</sup> N]-                | C <sub>17</sub> H <sub>26</sub> O <sub>14</sub>                |
| 533.1126 | C <sub>17</sub> H <sub>26</sub> O <sub>18</sub> [ <sup>15</sup> N]-                | C <sub>17</sub> H <sub>26</sub> O <sub>15</sub>                |
| 487.1435 | C <sub>17</sub> H <sub>28</sub> O <sub>15</sub> [ <sup>15</sup> N]-                | C <sub>17</sub> H <sub>28</sub> O <sub>12</sub>                |
| 503.1384 | C <sub>17</sub> H <sub>28</sub> O <sub>16</sub> [ <sup>15</sup> N]-                | C <sub>17</sub> H <sub>28</sub> O <sub>13</sub>                |
| 483.1486 | C <sub>18</sub> H <sub>28</sub> O <sub>14</sub> [ <sup>15</sup> N]-                | C <sub>18</sub> H <sub>28</sub> O <sub>11</sub>                |
| 499.1435 | C <sub>18</sub> H <sub>28</sub> O <sub>15</sub> [ <sup>15</sup> N]-                | C <sub>18</sub> H <sub>28</sub> O <sub>12</sub>                |
| 515.1384 | C <sub>18</sub> H <sub>28</sub> O <sub>16</sub> [ <sup>15</sup> N]-                | C <sub>18</sub> H <sub>28</sub> O <sub>13</sub>                |
| 609.1398 | C <sub>18</sub> H <sub>30</sub> N <sub>2</sub> O <sub>20</sub> [ <sup>15</sup> N]- | C <sub>18</sub> H <sub>30</sub> N <sub>2</sub> O <sub>17</sub> |
| 469.1693 | C <sub>18</sub> H <sub>30</sub> O <sub>13</sub> [ <sup>15</sup> N]-                | C <sub>18</sub> H <sub>30</sub> O <sub>10</sub>                |
| 485.1642 | C <sub>18</sub> H <sub>30</sub> O <sub>14</sub> [ <sup>15</sup> N]-                | C <sub>18</sub> H <sub>30</sub> O <sub>11</sub>                |
| 501.1591 | C <sub>18</sub> H <sub>30</sub> O <sub>15</sub> [ <sup>15</sup> N]-                | C <sub>18</sub> H <sub>30</sub> O <sub>12</sub>                |
| 517.1540 | C <sub>18</sub> H <sub>30</sub> O <sub>16</sub> [ <sup>15</sup> N]-                | C <sub>18</sub> H <sub>30</sub> O <sub>13</sub>                |
| 533.1490 | C <sub>18</sub> H <sub>30</sub> O <sub>17</sub> [ <sup>15</sup> N]-                | C <sub>18</sub> H <sub>30</sub> O <sub>14</sub>                |
| 495.1486 | C <sub>19</sub> H <sub>28</sub> O <sub>14</sub> [ <sup>15</sup> N]-                | C <sub>19</sub> H <sub>28</sub> O <sub>11</sub>                |

|          |                                                                                    |                                                                |
|----------|------------------------------------------------------------------------------------|----------------------------------------------------------------|
| 511.1435 | C <sub>19</sub> H <sub>28</sub> O <sub>15</sub> [ <sup>15</sup> N]-                | C <sub>19</sub> H <sub>28</sub> O <sub>12</sub>                |
| 527.1384 | C <sub>19</sub> H <sub>28</sub> O <sub>16</sub> [ <sup>15</sup> N]-                | C <sub>19</sub> H <sub>28</sub> O <sub>13</sub>                |
| 559.1282 | C <sub>19</sub> H <sub>28</sub> O <sub>18</sub> [ <sup>15</sup> N]-                | C <sub>19</sub> H <sub>28</sub> O <sub>15</sub>                |
| 481.1693 | C <sub>19</sub> H <sub>30</sub> O <sub>13</sub> [ <sup>15</sup> N]-                | C <sub>19</sub> H <sub>30</sub> O <sub>10</sub>                |
| 497.1642 | C <sub>19</sub> H <sub>30</sub> O <sub>14</sub> [ <sup>15</sup> N]-                | C <sub>19</sub> H <sub>30</sub> O <sub>11</sub>                |
| 513.1591 | C <sub>19</sub> H <sub>30</sub> O <sub>15</sub> [ <sup>15</sup> N]-                | C <sub>19</sub> H <sub>30</sub> O <sub>12</sub>                |
| 529.1540 | C <sub>19</sub> H <sub>30</sub> O <sub>16</sub> [ <sup>15</sup> N]-                | C <sub>19</sub> H <sub>30</sub> O <sub>13</sub>                |
| 545.1490 | C <sub>19</sub> H <sub>30</sub> O <sub>17</sub> [ <sup>15</sup> N]-                | C <sub>19</sub> H <sub>30</sub> O <sub>14</sub>                |
| 561.1439 | C <sub>19</sub> H <sub>30</sub> O <sub>18</sub> [ <sup>15</sup> N]-                | C <sub>19</sub> H <sub>30</sub> O <sub>15</sub>                |
| 577.1388 | C <sub>19</sub> H <sub>30</sub> O <sub>19</sub> [ <sup>15</sup> N]-                | C <sub>19</sub> H <sub>30</sub> O <sub>16</sub>                |
| 593.1337 | C <sub>19</sub> H <sub>30</sub> O <sub>20</sub> [ <sup>15</sup> N]-                | C <sub>19</sub> H <sub>30</sub> O <sub>17</sub>                |
| 558.1680 | C <sub>19</sub> H <sub>31</sub> N <sub>2</sub> O <sub>16</sub> [ <sup>15</sup> N]- | C <sub>19</sub> H <sub>31</sub> N <sub>2</sub> O <sub>13</sub> |
| 512.1751 | C <sub>19</sub> H <sub>31</sub> NO <sub>14</sub> [ <sup>15</sup> N]-               | C <sub>19</sub> H <sub>31</sub> NO <sub>11</sub>               |
| 528.1700 | C <sub>19</sub> H <sub>31</sub> NO <sub>15</sub> [ <sup>15</sup> N]-               | C <sub>19</sub> H <sub>31</sub> NO <sub>12</sub>               |
| 544.1649 | C <sub>19</sub> H <sub>31</sub> NO <sub>16</sub> [ <sup>15</sup> N]-               | C <sub>19</sub> H <sub>31</sub> NO <sub>13</sub>               |
| 560.1599 | C <sub>19</sub> H <sub>31</sub> NO <sub>17</sub> [ <sup>15</sup> N]-               | C <sub>19</sub> H <sub>31</sub> NO <sub>14</sub>               |
| 576.1548 | C <sub>19</sub> H <sub>31</sub> NO <sub>18</sub> [ <sup>15</sup> N]-               | C <sub>19</sub> H <sub>31</sub> NO <sub>15</sub>               |
| 592.1497 | C <sub>19</sub> H <sub>31</sub> NO <sub>19</sub> [ <sup>15</sup> N]-               | C <sub>19</sub> H <sub>31</sub> NO <sub>16</sub>               |
| 608.1446 | C <sub>19</sub> H <sub>31</sub> NO <sub>20</sub> [ <sup>15</sup> N]-               | C <sub>19</sub> H <sub>31</sub> NO <sub>17</sub>               |
| 624.1395 | C <sub>19</sub> H <sub>31</sub> NO <sub>21</sub> [ <sup>15</sup> N]-               | C <sub>19</sub> H <sub>31</sub> NO <sub>18</sub>               |
| 483.1849 | C <sub>19</sub> H <sub>32</sub> O <sub>13</sub> [ <sup>15</sup> N]-                | C <sub>19</sub> H <sub>32</sub> O <sub>10</sub>                |
| 499.1799 | C <sub>19</sub> H <sub>32</sub> O <sub>14</sub> [ <sup>15</sup> N]-                | C <sub>19</sub> H <sub>32</sub> O <sub>11</sub>                |
| 515.1748 | C <sub>19</sub> H <sub>32</sub> O <sub>15</sub> [ <sup>15</sup> N]-                | C <sub>19</sub> H <sub>32</sub> O <sub>12</sub>                |
| 531.1697 | C <sub>19</sub> H <sub>32</sub> O <sub>16</sub> [ <sup>15</sup> N]-                | C <sub>19</sub> H <sub>32</sub> O <sub>13</sub>                |
| 547.1646 | C <sub>19</sub> H <sub>32</sub> O <sub>17</sub> [ <sup>15</sup> N]-                | C <sub>19</sub> H <sub>32</sub> O <sub>14</sub>                |
| 563.1595 | C <sub>19</sub> H <sub>32</sub> O <sub>18</sub> [ <sup>15</sup> N]-                | C <sub>19</sub> H <sub>32</sub> O <sub>15</sub>                |
| 493.1693 | C <sub>20</sub> H <sub>30</sub> O <sub>13</sub> [ <sup>15</sup> N]-                | C <sub>20</sub> H <sub>30</sub> O <sub>10</sub>                |
| 509.1642 | C <sub>20</sub> H <sub>30</sub> O <sub>14</sub> [ <sup>15</sup> N]-                | C <sub>20</sub> H <sub>30</sub> O <sub>11</sub>                |
| 573.1439 | C <sub>20</sub> H <sub>30</sub> O <sub>18</sub> [ <sup>15</sup> N]-                | C <sub>20</sub> H <sub>30</sub> O <sub>15</sub>                |
| 589.1388 | C <sub>20</sub> H <sub>30</sub> O <sub>19</sub> [ <sup>15</sup> N]-                | C <sub>20</sub> H <sub>30</sub> O <sub>16</sub>                |
| 605.1337 | C <sub>20</sub> H <sub>30</sub> O <sub>20</sub> [ <sup>15</sup> N]-                | C <sub>20</sub> H <sub>30</sub> O <sub>17</sub>                |
| 621.1286 | C <sub>20</sub> H <sub>30</sub> O <sub>21</sub> [ <sup>15</sup> N]-                | C <sub>20</sub> H <sub>30</sub> O <sub>18</sub>                |
| 588.1548 | C <sub>20</sub> H <sub>31</sub> NO <sub>18</sub> [ <sup>15</sup> N]-               | C <sub>20</sub> H <sub>31</sub> NO <sub>15</sub>               |
| 526.1670 | C <sub>20</sub> H <sub>31</sub> O <sub>15</sub> [ <sup>15</sup> N]-                | C <sub>20</sub> H <sub>31</sub> O <sub>12</sub>                |
| 542.1619 | C <sub>20</sub> H <sub>31</sub> O <sub>16</sub> [ <sup>15</sup> N]-                | C <sub>20</sub> H <sub>31</sub> O <sub>13</sub>                |
| 479.1900 | C <sub>20</sub> H <sub>32</sub> O <sub>12</sub> [ <sup>15</sup> N]-                | C <sub>20</sub> H <sub>32</sub> O <sub>9</sub>                 |
| 495.1849 | C <sub>20</sub> H <sub>32</sub> O <sub>13</sub> [ <sup>15</sup> N]-                | C <sub>20</sub> H <sub>32</sub> O <sub>10</sub>                |
| 511.1799 | C <sub>20</sub> H <sub>32</sub> O <sub>14</sub> [ <sup>15</sup> N]-                | C <sub>20</sub> H <sub>32</sub> O <sub>11</sub>                |
| 527.1748 | C <sub>20</sub> H <sub>32</sub> O <sub>15</sub> [ <sup>15</sup> N]-                | C <sub>20</sub> H <sub>32</sub> O <sub>12</sub>                |
| 559.1646 | C <sub>20</sub> H <sub>32</sub> O <sub>17</sub> [ <sup>15</sup> N]-                | C <sub>20</sub> H <sub>32</sub> O <sub>14</sub>                |
| 575.1595 | C <sub>20</sub> H <sub>32</sub> O <sub>18</sub> [ <sup>15</sup> N]-                | C <sub>20</sub> H <sub>32</sub> O <sub>15</sub>                |
| 607.1494 | C <sub>20</sub> H <sub>32</sub> O <sub>20</sub> [ <sup>15</sup> N]-                | C <sub>20</sub> H <sub>32</sub> O <sub>17</sub>                |
| 623.1443 | C <sub>20</sub> H <sub>32</sub> O <sub>21</sub> [ <sup>15</sup> N]-                | C <sub>20</sub> H <sub>32</sub> O <sub>18</sub>                |

|          |                               |                      |
|----------|-------------------------------|----------------------|
| 497.2006 | $C_{20}H_{34}O_{13}[^{15}N]-$ | $C_{20}H_{34}O_{10}$ |
| 513.1955 | $C_{20}H_{34}O_{14}[^{15}N]-$ | $C_{20}H_{34}O_{11}$ |
| 529.1904 | $C_{20}H_{34}O_{15}[^{15}N]-$ | $C_{20}H_{34}O_{12}$ |
| 545.1853 | $C_{20}H_{34}O_{16}[^{15}N]-$ | $C_{20}H_{34}O_{13}$ |
| 561.1803 | $C_{20}H_{34}O_{17}[^{15}N]-$ | $C_{20}H_{34}O_{14}$ |
| 577.1752 | $C_{20}H_{34}O_{18}[^{15}N]-$ | $C_{20}H_{34}O_{15}$ |
| 593.1701 | $C_{20}H_{34}O_{19}[^{15}N]-$ | $C_{20}H_{34}O_{16}$ |
| 609.1650 | $C_{20}H_{34}O_{20}[^{15}N]-$ | $C_{20}H_{34}O_{17}$ |

226

**Table S5.** Identification of HOM monomers and dimers species at high NO.

| m/z      | Detected ion formula                                                              | Target molecule formula                                      |
|----------|-----------------------------------------------------------------------------------|--------------------------------------------------------------|
| 277.0179 | C <sub>5</sub> H <sub>10</sub> O <sub>12</sub> [ <sup>15</sup> N]-                | C <sub>5</sub> H <sub>10</sub> O <sub>9</sub>                |
| 309.0077 | C <sub>5</sub> H <sub>10</sub> O <sub>14</sub> [ <sup>15</sup> N]-                | C <sub>5</sub> H <sub>10</sub> O <sub>11</sub>               |
| 340.9975 | C <sub>5</sub> H <sub>10</sub> O <sub>16</sub> [ <sup>15</sup> N]-                | C <sub>5</sub> H <sub>10</sub> O <sub>13</sub>               |
| 225.0018 | C <sub>5</sub> H <sub>6</sub> O <sub>9</sub> [ <sup>15</sup> N]-                  | C <sub>5</sub> H <sub>6</sub> O <sub>6</sub>                 |
| 256.0077 | C <sub>5</sub> H <sub>7</sub> NO <sub>10</sub> [ <sup>15</sup> N]-                | C <sub>5</sub> H <sub>7</sub> NO <sub>7</sub>                |
| 272.0026 | C <sub>5</sub> H <sub>7</sub> NO <sub>11</sub> [ <sup>15</sup> N]-                | C <sub>5</sub> H <sub>7</sub> NO <sub>8</sub>                |
| 287.9975 | C <sub>5</sub> H <sub>7</sub> NO <sub>12</sub> [ <sup>15</sup> N]-                | C <sub>5</sub> H <sub>7</sub> NO <sub>9</sub>                |
| 319.9873 | C <sub>5</sub> H <sub>7</sub> NO <sub>14</sub> [ <sup>15</sup> N]-                | C <sub>5</sub> H <sub>7</sub> NO <sub>11</sub>               |
| 303.0084 | C <sub>5</sub> H <sub>8</sub> N <sub>2</sub> O <sub>12</sub> [ <sup>15</sup> N]-  | C <sub>5</sub> H <sub>8</sub> N <sub>2</sub> O <sub>9</sub>  |
| 338.9819 | C <sub>5</sub> H <sub>8</sub> O <sub>16</sub> [ <sup>15</sup> N]-                 | C <sub>5</sub> H <sub>8</sub> O <sub>13</sub>                |
| 242.0284 | C <sub>5</sub> H <sub>9</sub> NO <sub>9</sub> [ <sup>15</sup> N]-                 | C <sub>5</sub> H <sub>9</sub> NO <sub>6</sub>                |
| 258.0233 | C <sub>5</sub> H <sub>9</sub> NO <sub>10</sub> [ <sup>15</sup> N]-                | C <sub>5</sub> H <sub>9</sub> NO <sub>7</sub>                |
| 274.0182 | C <sub>5</sub> H <sub>9</sub> NO <sub>11</sub> [ <sup>15</sup> N]-                | C <sub>5</sub> H <sub>9</sub> NO <sub>8</sub>                |
| 306.0080 | C <sub>5</sub> H <sub>9</sub> NO <sub>13</sub> [ <sup>15</sup> N]-                | C <sub>5</sub> H <sub>9</sub> NO <sub>10</sub>               |
| 353.9928 | C <sub>5</sub> H <sub>9</sub> NO <sub>16</sub> [ <sup>15</sup> N]-                | C <sub>5</sub> H <sub>9</sub> NO <sub>13</sub>               |
| 317.0240 | C <sub>6</sub> H <sub>10</sub> N <sub>2</sub> O <sub>12</sub> [ <sup>15</sup> N]- | C <sub>6</sub> H <sub>10</sub> N <sub>2</sub> O <sub>9</sub> |
| 305.0128 | C <sub>6</sub> H <sub>10</sub> O <sub>13</sub> [ <sup>15</sup> N]-                | C <sub>6</sub> H <sub>10</sub> O <sub>10</sub>               |
| 256.0440 | C <sub>6</sub> H <sub>11</sub> NO <sub>9</sub> [ <sup>15</sup> N]-                | C <sub>6</sub> H <sub>11</sub> NO <sub>6</sub>               |
| 272.0390 | C <sub>6</sub> H <sub>11</sub> NO <sub>10</sub> [ <sup>15</sup> N]-               | C <sub>6</sub> H <sub>11</sub> NO <sub>7</sub>               |
| 320.0237 | C <sub>6</sub> H <sub>11</sub> NO <sub>13</sub> [ <sup>15</sup> N]-               | C <sub>6</sub> H <sub>11</sub> NO <sub>10</sub>              |
| 303.0448 | C <sub>6</sub> H <sub>12</sub> N <sub>2</sub> O <sub>11</sub> [ <sup>15</sup> N]- | C <sub>6</sub> H <sub>12</sub> N <sub>2</sub> O <sub>8</sub> |
| 319.0397 | C <sub>6</sub> H <sub>12</sub> N <sub>2</sub> O <sub>12</sub> [ <sup>15</sup> N]- | C <sub>6</sub> H <sub>12</sub> N <sub>2</sub> O <sub>9</sub> |
| 274.0546 | C <sub>6</sub> H <sub>13</sub> NO <sub>10</sub> [ <sup>15</sup> N]-               | C <sub>6</sub> H <sub>13</sub> NO <sub>7</sub>               |
| 370.0241 | C <sub>6</sub> H <sub>13</sub> NO <sub>16</sub> [ <sup>15</sup> N]-               | C <sub>6</sub> H <sub>13</sub> NO <sub>13</sub>              |
| 281.0029 | C <sub>6</sub> H <sub>6</sub> N <sub>2</sub> O <sub>10</sub> [ <sup>15</sup> N]-  | C <sub>6</sub> H <sub>6</sub> N <sub>2</sub> O <sub>7</sub>  |
| 221.0069 | C <sub>6</sub> H <sub>6</sub> O <sub>8</sub> [ <sup>15</sup> N]-                  | C <sub>6</sub> H <sub>6</sub> O <sub>5</sub>                 |
| 237.0018 | C <sub>6</sub> H <sub>6</sub> O <sub>9</sub> [ <sup>15</sup> N]-                  | C <sub>6</sub> H <sub>6</sub> O <sub>6</sub>                 |
| 252.9968 | C <sub>6</sub> H <sub>6</sub> O <sub>10</sub> [ <sup>15</sup> N]-                 | C <sub>6</sub> H <sub>6</sub> O <sub>7</sub>                 |
| 268.9917 | C <sub>6</sub> H <sub>6</sub> O <sub>11</sub> [ <sup>15</sup> N]-                 | C <sub>6</sub> H <sub>6</sub> O <sub>8</sub>                 |
| 316.9764 | C <sub>6</sub> H <sub>6</sub> O <sub>14</sub> [ <sup>15</sup> N]-                 | C <sub>6</sub> H <sub>6</sub> O <sub>11</sub>                |
| 268.0077 | C <sub>6</sub> H <sub>7</sub> NO <sub>10</sub> [ <sup>15</sup> N]-                | C <sub>6</sub> H <sub>7</sub> NO <sub>7</sub>                |
| 299.0135 | C <sub>6</sub> H <sub>8</sub> N <sub>2</sub> O <sub>11</sub> [ <sup>15</sup> N]-  | C <sub>6</sub> H <sub>8</sub> N <sub>2</sub> O <sub>8</sub>  |
| 223.0226 | C <sub>6</sub> H <sub>8</sub> O <sub>8</sub> [ <sup>15</sup> N]-                  | C <sub>6</sub> H <sub>8</sub> O <sub>5</sub>                 |
| 239.0175 | C <sub>6</sub> H <sub>8</sub> O <sub>9</sub> [ <sup>15</sup> N]-                  | C <sub>6</sub> H <sub>8</sub> O <sub>6</sub>                 |
| 271.0073 | C <sub>6</sub> H <sub>8</sub> O <sub>11</sub> [ <sup>15</sup> N]-                 | C <sub>6</sub> H <sub>8</sub> O <sub>8</sub>                 |
| 287.0022 | C <sub>6</sub> H <sub>8</sub> O <sub>12</sub> [ <sup>15</sup> N]-                 | C <sub>6</sub> H <sub>8</sub> O <sub>9</sub>                 |
| 318.9921 | C <sub>6</sub> H <sub>8</sub> O <sub>14</sub> [ <sup>15</sup> N]-                 | C <sub>6</sub> H <sub>8</sub> O <sub>11</sub>                |
| 270.0233 | C <sub>6</sub> H <sub>9</sub> NO <sub>10</sub> [ <sup>15</sup> N]-                | C <sub>6</sub> H <sub>9</sub> NO <sub>7</sub>                |
| 286.0182 | C <sub>6</sub> H <sub>9</sub> NO <sub>11</sub> [ <sup>15</sup> N]-                | C <sub>6</sub> H <sub>9</sub> NO <sub>8</sub>                |
| 297.0342 | C <sub>7</sub> H <sub>10</sub> N <sub>2</sub> O <sub>10</sub> [ <sup>15</sup> N]- | C <sub>7</sub> H <sub>10</sub> N <sub>2</sub> O <sub>7</sub> |
| 329.0240 | C <sub>7</sub> H <sub>10</sub> N <sub>2</sub> O <sub>12</sub> [ <sup>15</sup> N]- | C <sub>7</sub> H <sub>10</sub> N <sub>2</sub> O <sub>9</sub> |



|          |                                                                                   |                                                               |
|----------|-----------------------------------------------------------------------------------|---------------------------------------------------------------|
| 377.0088 | C <sub>7</sub> H <sub>10</sub> N <sub>2</sub> O <sub>15</sub> [ <sup>15</sup> N]- | C <sub>7</sub> H <sub>10</sub> N <sub>2</sub> O <sub>12</sub> |
| 221.0433 | C <sub>7</sub> H <sub>10</sub> O <sub>7</sub> [ <sup>15</sup> N]-                 | C <sub>7</sub> H <sub>10</sub> O <sub>4</sub>                 |
| 237.0382 | C <sub>7</sub> H <sub>10</sub> O <sub>8</sub> [ <sup>15</sup> N]-                 | C <sub>7</sub> H <sub>10</sub> O <sub>5</sub>                 |
| 253.0331 | C <sub>7</sub> H <sub>10</sub> O <sub>9</sub> [ <sup>15</sup> N]-                 | C <sub>7</sub> H <sub>10</sub> O <sub>6</sub>                 |
| 269.0281 | C <sub>7</sub> H <sub>10</sub> O <sub>10</sub> [ <sup>15</sup> N]-                | C <sub>7</sub> H <sub>10</sub> O <sub>7</sub>                 |
| 285.0230 | C <sub>7</sub> H <sub>10</sub> O <sub>11</sub> [ <sup>15</sup> N]-                | C <sub>7</sub> H <sub>10</sub> O <sub>8</sub>                 |
| 301.0179 | C <sub>7</sub> H <sub>10</sub> O <sub>12</sub> [ <sup>15</sup> N]-                | C <sub>7</sub> H <sub>10</sub> O <sub>9</sub>                 |
| 333.0077 | C <sub>7</sub> H <sub>10</sub> O <sub>14</sub> [ <sup>15</sup> N]-                | C <sub>7</sub> H <sub>10</sub> O <sub>11</sub>                |
| 349.0026 | C <sub>7</sub> H <sub>10</sub> O <sub>15</sub> [ <sup>15</sup> N]-                | C <sub>7</sub> H <sub>10</sub> O <sub>12</sub>                |
| 364.9975 | C <sub>7</sub> H <sub>10</sub> O <sub>16</sub> [ <sup>15</sup> N]-                | C <sub>7</sub> H <sub>10</sub> O <sub>13</sub>                |
| 268.0440 | C <sub>7</sub> H <sub>11</sub> NO <sub>9</sub> [ <sup>15</sup> N]-                | C <sub>7</sub> H <sub>11</sub> NO <sub>6</sub>                |
| 284.0390 | C <sub>7</sub> H <sub>11</sub> NO <sub>10</sub> [ <sup>15</sup> N]-               | C <sub>7</sub> H <sub>11</sub> NO <sub>7</sub>                |
| 300.0339 | C <sub>7</sub> H <sub>11</sub> NO <sub>11</sub> [ <sup>15</sup> N]-               | C <sub>7</sub> H <sub>11</sub> NO <sub>8</sub>                |
| 332.0237 | C <sub>7</sub> H <sub>11</sub> NO <sub>13</sub> [ <sup>15</sup> N]-               | C <sub>7</sub> H <sub>11</sub> NO <sub>10</sub>               |
| 348.0186 | C <sub>7</sub> H <sub>11</sub> NO <sub>14</sub> [ <sup>15</sup> N]-               | C <sub>7</sub> H <sub>11</sub> NO <sub>11</sub>               |
| 364.0135 | C <sub>7</sub> H <sub>11</sub> NO <sub>15</sub> [ <sup>15</sup> N]-               | C <sub>7</sub> H <sub>11</sub> NO <sub>12</sub>               |
| 380.0084 | C <sub>7</sub> H <sub>11</sub> NO <sub>16</sub> [ <sup>15</sup> N]-               | C <sub>7</sub> H <sub>11</sub> NO <sub>13</sub>               |
| 299.0499 | C <sub>7</sub> H <sub>12</sub> N <sub>2</sub> O <sub>10</sub> [ <sup>15</sup> N]- | C <sub>7</sub> H <sub>12</sub> N <sub>2</sub> O <sub>7</sub>  |
| 223.0590 | C <sub>7</sub> H <sub>12</sub> O <sub>7</sub> [ <sup>15</sup> N]-                 | C <sub>7</sub> H <sub>12</sub> O <sub>4</sub>                 |
| 239.0539 | C <sub>7</sub> H <sub>12</sub> O <sub>8</sub> [ <sup>15</sup> N]-                 | C <sub>7</sub> H <sub>12</sub> O <sub>5</sub>                 |
| 271.0437 | C <sub>7</sub> H <sub>12</sub> O <sub>10</sub> [ <sup>15</sup> N]-                | C <sub>7</sub> H <sub>12</sub> O <sub>7</sub>                 |
| 287.0386 | C <sub>7</sub> H <sub>12</sub> O <sub>11</sub> [ <sup>15</sup> N]-                | C <sub>7</sub> H <sub>12</sub> O <sub>8</sub>                 |
| 286.0546 | C <sub>7</sub> H <sub>13</sub> NO <sub>10</sub> [ <sup>15</sup> N]-               | C <sub>7</sub> H <sub>13</sub> NO <sub>7</sub>                |
| 334.0393 | C <sub>7</sub> H <sub>13</sub> NO <sub>13</sub> [ <sup>15</sup> N]-               | C <sub>7</sub> H <sub>13</sub> NO <sub>10</sub>               |
| 317.0604 | C <sub>7</sub> H <sub>14</sub> N <sub>2</sub> O <sub>11</sub> [ <sup>15</sup> N]- | C <sub>7</sub> H <sub>14</sub> N <sub>2</sub> O <sub>8</sub>  |
| 480.0092 | C <sub>7</sub> H <sub>15</sub> NO <sub>22</sub> [ <sup>15</sup> N]-               | C <sub>7</sub> H <sub>15</sub> NO <sub>19</sub>               |
| 339.0547 | C <sub>7</sub> H <sub>16</sub> O <sub>14</sub> [ <sup>15</sup> N]-                | C <sub>7</sub> H <sub>16</sub> O <sub>11</sub>                |
| 217.0120 | C <sub>7</sub> H <sub>6</sub> O <sub>7</sub> [ <sup>15</sup> N]-                  | C <sub>7</sub> H <sub>6</sub> O <sub>4</sub>                  |
| 249.0018 | C <sub>7</sub> H <sub>6</sub> O <sub>9</sub> [ <sup>15</sup> N]-                  | C <sub>7</sub> H <sub>6</sub> O <sub>6</sub>                  |
| 296.0026 | C <sub>7</sub> H <sub>7</sub> NO <sub>11</sub> [ <sup>15</sup> N]-                | C <sub>7</sub> H <sub>7</sub> NO <sub>8</sub>                 |
| 235.0226 | C <sub>7</sub> H <sub>8</sub> O <sub>8</sub> [ <sup>15</sup> N]-                  | C <sub>7</sub> H <sub>8</sub> O <sub>5</sub>                  |
| 267.0124 | C <sub>7</sub> H <sub>8</sub> O <sub>10</sub> [ <sup>15</sup> N]-                 | C <sub>7</sub> H <sub>8</sub> O <sub>7</sub>                  |
| 283.0073 | C <sub>7</sub> H <sub>8</sub> O <sub>11</sub> [ <sup>15</sup> N]-                 | C <sub>7</sub> H <sub>8</sub> O <sub>8</sub>                  |
| 314.9971 | C <sub>7</sub> H <sub>8</sub> O <sub>13</sub> [ <sup>15</sup> N]-                 | C <sub>7</sub> H <sub>8</sub> O <sub>10</sub>                 |
| 330.9921 | C <sub>7</sub> H <sub>8</sub> O <sub>14</sub> [ <sup>15</sup> N]-                 | C <sub>7</sub> H <sub>8</sub> O <sub>11</sub>                 |
| 346.9870 | C <sub>7</sub> H <sub>8</sub> O <sub>15</sub> [ <sup>15</sup> N]-                 | C <sub>7</sub> H <sub>8</sub> O <sub>12</sub>                 |
| 362.9819 | C <sub>7</sub> H <sub>8</sub> O <sub>16</sub> [ <sup>15</sup> N]-                 | C <sub>7</sub> H <sub>8</sub> O <sub>13</sub>                 |
| 378.9768 | C <sub>7</sub> H <sub>8</sub> O <sub>17</sub> [ <sup>15</sup> N]-                 | C <sub>7</sub> H <sub>8</sub> O <sub>14</sub>                 |
| 250.0335 | C <sub>7</sub> H <sub>9</sub> NO <sub>8</sub> [ <sup>15</sup> N]-                 | C <sub>7</sub> H <sub>9</sub> NO <sub>5</sub>                 |
| 282.0233 | C <sub>7</sub> H <sub>9</sub> NO <sub>10</sub> [ <sup>15</sup> N]-                | C <sub>7</sub> H <sub>9</sub> NO <sub>7</sub>                 |
| 298.0182 | C <sub>7</sub> H <sub>9</sub> NO <sub>11</sub> [ <sup>15</sup> N]-                | C <sub>7</sub> H <sub>9</sub> NO <sub>8</sub>                 |
| 314.0131 | C <sub>7</sub> H <sub>9</sub> NO <sub>12</sub> [ <sup>15</sup> N]-                | C <sub>7</sub> H <sub>9</sub> NO <sub>9</sub>                 |
| 330.0080 | C <sub>7</sub> H <sub>9</sub> NO <sub>13</sub> [ <sup>15</sup> N]-                | C <sub>7</sub> H <sub>9</sub> NO <sub>10</sub>                |

|          |                                                                                   |                                                               |
|----------|-----------------------------------------------------------------------------------|---------------------------------------------------------------|
| 346.0030 | C <sub>7</sub> H <sub>9</sub> NO <sub>14</sub> [ <sup>15</sup> N]-                | C <sub>7</sub> H <sub>9</sub> NO <sub>11</sub>                |
| 361.9979 | C <sub>7</sub> H <sub>9</sub> NO <sub>15</sub> [ <sup>15</sup> N]-                | C <sub>7</sub> H <sub>9</sub> NO <sub>12</sub>                |
| 393.9877 | C <sub>7</sub> H <sub>9</sub> NO <sub>17</sub> [ <sup>15</sup> N]-                | C <sub>7</sub> H <sub>9</sub> NO <sub>14</sub>                |
| 436.9935 | C <sub>8</sub> H <sub>10</sub> N <sub>2</sub> O <sub>18</sub> [ <sup>15</sup> N]- | C <sub>8</sub> H <sub>10</sub> N <sub>2</sub> O <sub>15</sub> |
| 249.0382 | C <sub>8</sub> H <sub>10</sub> O <sub>8</sub> [ <sup>15</sup> N]-                 | C <sub>8</sub> H <sub>10</sub> O <sub>5</sub>                 |
| 265.0331 | C <sub>8</sub> H <sub>10</sub> O <sub>9</sub> [ <sup>15</sup> N]-                 | C <sub>8</sub> H <sub>10</sub> O <sub>6</sub>                 |
| 281.0281 | C <sub>8</sub> H <sub>10</sub> O <sub>10</sub> [ <sup>15</sup> N]-                | C <sub>8</sub> H <sub>10</sub> O <sub>7</sub>                 |
| 313.0179 | C <sub>8</sub> H <sub>10</sub> O <sub>12</sub> [ <sup>15</sup> N]-                | C <sub>8</sub> H <sub>10</sub> O <sub>9</sub>                 |
| 329.0128 | C <sub>8</sub> H <sub>10</sub> O <sub>13</sub> [ <sup>15</sup> N]-                | C <sub>8</sub> H <sub>10</sub> O <sub>10</sub>                |
| 345.0077 | C <sub>8</sub> H <sub>10</sub> O <sub>14</sub> [ <sup>15</sup> N]-                | C <sub>8</sub> H <sub>10</sub> O <sub>11</sub>                |
| 361.0026 | C <sub>8</sub> H <sub>10</sub> O <sub>15</sub> [ <sup>15</sup> N]-                | C <sub>8</sub> H <sub>10</sub> O <sub>12</sub>                |
| 392.9925 | C <sub>8</sub> H <sub>10</sub> O <sub>17</sub> [ <sup>15</sup> N]-                | C <sub>8</sub> H <sub>10</sub> O <sub>14</sub>                |
| 264.0491 | C <sub>8</sub> H <sub>11</sub> NO <sub>8</sub> [ <sup>15</sup> N]-                | C <sub>8</sub> H <sub>11</sub> NO <sub>5</sub>                |
| 280.0440 | C <sub>8</sub> H <sub>11</sub> NO <sub>9</sub> [ <sup>15</sup> N]-                | C <sub>8</sub> H <sub>11</sub> NO <sub>6</sub>                |
| 296.0390 | C <sub>8</sub> H <sub>11</sub> NO <sub>10</sub> [ <sup>15</sup> N]-               | C <sub>8</sub> H <sub>11</sub> NO <sub>7</sub>                |
| 312.0339 | C <sub>8</sub> H <sub>11</sub> NO <sub>11</sub> [ <sup>15</sup> N]-               | C <sub>8</sub> H <sub>11</sub> NO <sub>8</sub>                |
| 328.0288 | C <sub>8</sub> H <sub>11</sub> NO <sub>12</sub> [ <sup>15</sup> N]-               | C <sub>8</sub> H <sub>11</sub> NO <sub>9</sub>                |
| 344.0237 | C <sub>8</sub> H <sub>11</sub> NO <sub>13</sub> [ <sup>15</sup> N]-               | C <sub>8</sub> H <sub>11</sub> NO <sub>10</sub>               |
| 360.0186 | C <sub>8</sub> H <sub>11</sub> NO <sub>14</sub> [ <sup>15</sup> N]-               | C <sub>8</sub> H <sub>11</sub> NO <sub>11</sub>               |
| 376.0135 | C <sub>8</sub> H <sub>11</sub> NO <sub>15</sub> [ <sup>15</sup> N]-               | C <sub>8</sub> H <sub>11</sub> NO <sub>12</sub>               |
| 392.0084 | C <sub>8</sub> H <sub>11</sub> NO <sub>16</sub> [ <sup>15</sup> N]-               | C <sub>8</sub> H <sub>11</sub> NO <sub>13</sub>               |
| 408.0034 | C <sub>8</sub> H <sub>11</sub> NO <sub>17</sub> [ <sup>15</sup> N]-               | C <sub>8</sub> H <sub>11</sub> NO <sub>14</sub>               |
| 423.9983 | C <sub>8</sub> H <sub>11</sub> NO <sub>18</sub> [ <sup>15</sup> N]-               | C <sub>8</sub> H <sub>11</sub> NO <sub>15</sub>               |
| 439.9932 | C <sub>8</sub> H <sub>11</sub> NO <sub>19</sub> [ <sup>15</sup> N]-               | C <sub>8</sub> H <sub>11</sub> NO <sub>16</sub>               |
| 235.0590 | C <sub>8</sub> H <sub>12</sub> O <sub>7</sub> [ <sup>15</sup> N]-                 | C <sub>8</sub> H <sub>12</sub> O <sub>4</sub>                 |
| 251.0539 | C <sub>8</sub> H <sub>12</sub> O <sub>8</sub> [ <sup>15</sup> N]-                 | C <sub>8</sub> H <sub>12</sub> O <sub>5</sub>                 |
| 267.0488 | C <sub>8</sub> H <sub>12</sub> O <sub>9</sub> [ <sup>15</sup> N]-                 | C <sub>8</sub> H <sub>12</sub> O <sub>6</sub>                 |
| 283.0437 | C <sub>8</sub> H <sub>12</sub> O <sub>10</sub> [ <sup>15</sup> N]-                | C <sub>8</sub> H <sub>12</sub> O <sub>7</sub>                 |
| 315.0335 | C <sub>8</sub> H <sub>12</sub> O <sub>12</sub> [ <sup>15</sup> N]-                | C <sub>8</sub> H <sub>12</sub> O <sub>9</sub>                 |
| 331.0284 | C <sub>8</sub> H <sub>12</sub> O <sub>13</sub> [ <sup>15</sup> N]-                | C <sub>8</sub> H <sub>12</sub> O <sub>10</sub>                |
| 347.0234 | C <sub>8</sub> H <sub>12</sub> O <sub>14</sub> [ <sup>15</sup> N]-                | C <sub>8</sub> H <sub>12</sub> O <sub>11</sub>                |
| 363.0183 | C <sub>8</sub> H <sub>12</sub> O <sub>15</sub> [ <sup>15</sup> N]-                | C <sub>8</sub> H <sub>12</sub> O <sub>12</sub>                |
| 379.0132 | C <sub>8</sub> H <sub>12</sub> O <sub>16</sub> [ <sup>15</sup> N]-                | C <sub>8</sub> H <sub>12</sub> O <sub>13</sub>                |
| 282.0597 | C <sub>8</sub> H <sub>13</sub> NO <sub>9</sub> [ <sup>15</sup> N]-                | C <sub>8</sub> H <sub>13</sub> NO <sub>6</sub>                |
| 298.0546 | C <sub>8</sub> H <sub>13</sub> NO <sub>10</sub> [ <sup>15</sup> N]-               | C <sub>8</sub> H <sub>13</sub> NO <sub>7</sub>                |
| 314.0495 | C <sub>8</sub> H <sub>13</sub> NO <sub>11</sub> [ <sup>15</sup> N]-               | C <sub>8</sub> H <sub>13</sub> NO <sub>8</sub>                |
| 330.0444 | C <sub>8</sub> H <sub>13</sub> NO <sub>12</sub> [ <sup>15</sup> N]-               | C <sub>8</sub> H <sub>13</sub> NO <sub>9</sub>                |
| 346.0393 | C <sub>8</sub> H <sub>13</sub> NO <sub>13</sub> [ <sup>15</sup> N]-               | C <sub>8</sub> H <sub>13</sub> NO <sub>10</sub>               |
| 362.0343 | C <sub>8</sub> H <sub>13</sub> NO <sub>14</sub> [ <sup>15</sup> N]-               | C <sub>8</sub> H <sub>13</sub> NO <sub>11</sub>               |
| 378.0292 | C <sub>8</sub> H <sub>13</sub> NO <sub>15</sub> [ <sup>15</sup> N]-               | C <sub>8</sub> H <sub>13</sub> NO <sub>12</sub>               |
| 394.0241 | C <sub>8</sub> H <sub>13</sub> NO <sub>16</sub> [ <sup>15</sup> N]-               | C <sub>8</sub> H <sub>13</sub> NO <sub>13</sub>               |
| 410.0190 | C <sub>8</sub> H <sub>13</sub> NO <sub>17</sub> [ <sup>15</sup> N]-               | C <sub>8</sub> H <sub>13</sub> NO <sub>14</sub>               |
| 329.0604 | C <sub>8</sub> H <sub>14</sub> N <sub>2</sub> O <sub>11</sub> [ <sup>15</sup> N]- | C <sub>8</sub> H <sub>14</sub> N <sub>2</sub> O <sub>8</sub>  |

|          |                                                                                   |                                                               |
|----------|-----------------------------------------------------------------------------------|---------------------------------------------------------------|
| 237.0746 | C <sub>8</sub> H <sub>14</sub> O <sub>7</sub> [ <sup>15</sup> N]-                 | C <sub>8</sub> H <sub>14</sub> O <sub>4</sub>                 |
| 253.0695 | C <sub>8</sub> H <sub>14</sub> O <sub>8</sub> [ <sup>15</sup> N]-                 | C <sub>8</sub> H <sub>14</sub> O <sub>5</sub>                 |
| 269.0644 | C <sub>8</sub> H <sub>14</sub> O <sub>9</sub> [ <sup>15</sup> N]-                 | C <sub>8</sub> H <sub>14</sub> O <sub>6</sub>                 |
| 301.0543 | C <sub>8</sub> H <sub>14</sub> O <sub>11</sub> [ <sup>15</sup> N]-                | C <sub>8</sub> H <sub>14</sub> O <sub>8</sub>                 |
| 333.0441 | C <sub>8</sub> H <sub>14</sub> O <sub>13</sub> [ <sup>15</sup> N]-                | C <sub>8</sub> H <sub>14</sub> O <sub>10</sub>                |
| 349.0390 | C <sub>8</sub> H <sub>14</sub> O <sub>14</sub> [ <sup>15</sup> N]-                | C <sub>8</sub> H <sub>14</sub> O <sub>11</sub>                |
| 365.0339 | C <sub>8</sub> H <sub>14</sub> O <sub>15</sub> [ <sup>15</sup> N]-                | C <sub>8</sub> H <sub>14</sub> O <sub>12</sub>                |
| 300.0703 | C <sub>8</sub> H <sub>15</sub> NO <sub>10</sub> [ <sup>15</sup> N]-               | C <sub>8</sub> H <sub>15</sub> NO <sub>7</sub>                |
| 332.0601 | C <sub>8</sub> H <sub>15</sub> NO <sub>12</sub> [ <sup>15</sup> N]-               | C <sub>8</sub> H <sub>15</sub> NO <sub>9</sub>                |
| 380.0448 | C <sub>8</sub> H <sub>15</sub> NO <sub>15</sub> [ <sup>15</sup> N]-               | C <sub>8</sub> H <sub>15</sub> NO <sub>12</sub>               |
| 331.0761 | C <sub>8</sub> H <sub>16</sub> N <sub>2</sub> O <sub>11</sub> [ <sup>15</sup> N]- | C <sub>8</sub> H <sub>16</sub> N <sub>2</sub> O <sub>8</sub>  |
| 342.9921 | C <sub>8</sub> H <sub>8</sub> O <sub>14</sub> [ <sup>15</sup> N]-                 | C <sub>8</sub> H <sub>8</sub> O <sub>11</sub>                 |
| 358.9870 | C <sub>8</sub> H <sub>8</sub> O <sub>15</sub> [ <sup>15</sup> N]-                 | C <sub>8</sub> H <sub>8</sub> O <sub>12</sub>                 |
| 422.9666 | C <sub>8</sub> H <sub>8</sub> O <sub>19</sub> [ <sup>15</sup> N]-                 | C <sub>8</sub> H <sub>8</sub> O <sub>16</sub>                 |
| 438.9616 | C <sub>8</sub> H <sub>8</sub> O <sub>20</sub> [ <sup>15</sup> N]-                 | C <sub>8</sub> H <sub>8</sub> O <sub>17</sub>                 |
| 453.9724 | C <sub>8</sub> H <sub>9</sub> NO <sub>20</sub> [ <sup>15</sup> N]-                | C <sub>8</sub> H <sub>9</sub> NO <sub>17</sub>                |
| 260.0542 | C <sub>9</sub> H <sub>11</sub> NO <sub>7</sub> [ <sup>15</sup> N]-                | C <sub>9</sub> H <sub>11</sub> NO <sub>4</sub>                |
| 355.0397 | C <sub>9</sub> H <sub>12</sub> N <sub>2</sub> O <sub>12</sub> [ <sup>15</sup> N]- | C <sub>9</sub> H <sub>12</sub> N <sub>2</sub> O <sub>9</sub>  |
| 387.0295 | C <sub>9</sub> H <sub>12</sub> N <sub>2</sub> O <sub>14</sub> [ <sup>15</sup> N]- | C <sub>9</sub> H <sub>12</sub> N <sub>2</sub> O <sub>11</sub> |
| 231.0640 | C <sub>9</sub> H <sub>12</sub> O <sub>6</sub> [ <sup>15</sup> N]-                 | C <sub>9</sub> H <sub>12</sub> O <sub>3</sub>                 |
| 279.0488 | C <sub>9</sub> H <sub>12</sub> O <sub>9</sub> [ <sup>15</sup> N]-                 | C <sub>9</sub> H <sub>12</sub> O <sub>6</sub>                 |
| 295.0437 | C <sub>9</sub> H <sub>12</sub> O <sub>10</sub> [ <sup>15</sup> N]-                | C <sub>9</sub> H <sub>12</sub> O <sub>7</sub>                 |
| 327.0335 | C <sub>9</sub> H <sub>12</sub> O <sub>12</sub> [ <sup>15</sup> N]-                | C <sub>9</sub> H <sub>12</sub> O <sub>9</sub>                 |
| 343.0284 | C <sub>9</sub> H <sub>12</sub> O <sub>13</sub> [ <sup>15</sup> N]-                | C <sub>9</sub> H <sub>12</sub> O <sub>10</sub>                |
| 359.0234 | C <sub>9</sub> H <sub>12</sub> O <sub>14</sub> [ <sup>15</sup> N]-                | C <sub>9</sub> H <sub>12</sub> O <sub>11</sub>                |
| 375.0183 | C <sub>9</sub> H <sub>12</sub> O <sub>15</sub> [ <sup>15</sup> N]-                | C <sub>9</sub> H <sub>12</sub> O <sub>12</sub>                |
| 391.0132 | C <sub>9</sub> H <sub>12</sub> O <sub>16</sub> [ <sup>15</sup> N]-                | C <sub>9</sub> H <sub>12</sub> O <sub>13</sub>                |
| 294.0597 | C <sub>9</sub> H <sub>13</sub> NO <sub>9</sub> [ <sup>15</sup> N]-                | C <sub>9</sub> H <sub>13</sub> NO <sub>6</sub>                |
| 310.0546 | C <sub>9</sub> H <sub>13</sub> NO <sub>10</sub> [ <sup>15</sup> N]-               | C <sub>9</sub> H <sub>13</sub> NO <sub>7</sub>                |
| 326.0495 | C <sub>9</sub> H <sub>13</sub> NO <sub>11</sub> [ <sup>15</sup> N]-               | C <sub>9</sub> H <sub>13</sub> NO <sub>8</sub>                |
| 342.0444 | C <sub>9</sub> H <sub>13</sub> NO <sub>12</sub> [ <sup>15</sup> N]-               | C <sub>9</sub> H <sub>13</sub> NO <sub>9</sub>                |
| 358.0393 | C <sub>9</sub> H <sub>13</sub> NO <sub>13</sub> [ <sup>15</sup> N]-               | C <sub>9</sub> H <sub>13</sub> NO <sub>10</sub>               |
| 374.0343 | C <sub>9</sub> H <sub>13</sub> NO <sub>14</sub> [ <sup>15</sup> N]-               | C <sub>9</sub> H <sub>13</sub> NO <sub>11</sub>               |
| 390.0292 | C <sub>9</sub> H <sub>13</sub> NO <sub>15</sub> [ <sup>15</sup> N]-               | C <sub>9</sub> H <sub>13</sub> NO <sub>12</sub>               |
| 406.0241 | C <sub>9</sub> H <sub>13</sub> NO <sub>16</sub> [ <sup>15</sup> N]-               | C <sub>9</sub> H <sub>13</sub> NO <sub>13</sub>               |
| 341.0604 | C <sub>9</sub> H <sub>14</sub> N <sub>2</sub> O <sub>11</sub> [ <sup>15</sup> N]- | C <sub>9</sub> H <sub>14</sub> N <sub>2</sub> O <sub>8</sub>  |
| 405.0401 | C <sub>9</sub> H <sub>14</sub> N <sub>2</sub> O <sub>15</sub> [ <sup>15</sup> N]- | C <sub>9</sub> H <sub>14</sub> N <sub>2</sub> O <sub>12</sub> |
| 249.0746 | C <sub>9</sub> H <sub>14</sub> O <sub>7</sub> [ <sup>15</sup> N]-                 | C <sub>9</sub> H <sub>14</sub> O <sub>4</sub>                 |
| 265.0695 | C <sub>9</sub> H <sub>14</sub> O <sub>8</sub> [ <sup>15</sup> N]-                 | C <sub>9</sub> H <sub>14</sub> O <sub>5</sub>                 |
| 281.0644 | C <sub>9</sub> H <sub>14</sub> O <sub>9</sub> [ <sup>15</sup> N]-                 | C <sub>9</sub> H <sub>14</sub> O <sub>6</sub>                 |
| 297.0594 | C <sub>9</sub> H <sub>14</sub> O <sub>10</sub> [ <sup>15</sup> N]-                | C <sub>9</sub> H <sub>14</sub> O <sub>7</sub>                 |
| 313.0543 | C <sub>9</sub> H <sub>14</sub> O <sub>11</sub> [ <sup>15</sup> N]-                | C <sub>9</sub> H <sub>14</sub> O <sub>8</sub>                 |
| 345.0441 | C <sub>9</sub> H <sub>14</sub> O <sub>13</sub> [ <sup>15</sup> N]-                | C <sub>9</sub> H <sub>14</sub> O <sub>10</sub>                |

|          |                                                                                    |                                                                |
|----------|------------------------------------------------------------------------------------|----------------------------------------------------------------|
| 361.0390 | C <sub>9</sub> H <sub>14</sub> O <sub>14</sub> [ <sup>15</sup> N]-                 | C <sub>9</sub> H <sub>14</sub> O <sub>11</sub>                 |
| 393.0288 | C <sub>9</sub> H <sub>14</sub> O <sub>16</sub> [ <sup>15</sup> N]-                 | C <sub>9</sub> H <sub>14</sub> O <sub>13</sub>                 |
| 409.0238 | C <sub>9</sub> H <sub>14</sub> O <sub>17</sub> [ <sup>15</sup> N]-                 | C <sub>9</sub> H <sub>14</sub> O <sub>14</sub>                 |
| 264.0855 | C <sub>9</sub> H <sub>15</sub> NO <sub>7</sub> [ <sup>15</sup> N]-                 | C <sub>9</sub> H <sub>15</sub> NO <sub>4</sub>                 |
| 280.0804 | C <sub>9</sub> H <sub>15</sub> NO <sub>8</sub> [ <sup>15</sup> N]-                 | C <sub>9</sub> H <sub>15</sub> NO <sub>5</sub>                 |
| 296.0753 | C <sub>9</sub> H <sub>15</sub> NO <sub>9</sub> [ <sup>15</sup> N]-                 | C <sub>9</sub> H <sub>15</sub> NO <sub>6</sub>                 |
| 312.0703 | C <sub>9</sub> H <sub>15</sub> NO <sub>10</sub> [ <sup>15</sup> N]-                | C <sub>9</sub> H <sub>15</sub> NO <sub>7</sub>                 |
| 328.0652 | C <sub>9</sub> H <sub>15</sub> NO <sub>11</sub> [ <sup>15</sup> N]-                | C <sub>9</sub> H <sub>15</sub> NO <sub>8</sub>                 |
| 344.0601 | C <sub>9</sub> H <sub>15</sub> NO <sub>12</sub> [ <sup>15</sup> N]-                | C <sub>9</sub> H <sub>15</sub> NO <sub>9</sub>                 |
| 360.0550 | C <sub>9</sub> H <sub>15</sub> NO <sub>13</sub> [ <sup>15</sup> N]-                | C <sub>9</sub> H <sub>15</sub> NO <sub>10</sub>                |
| 376.0499 | C <sub>9</sub> H <sub>15</sub> NO <sub>14</sub> [ <sup>15</sup> N]-                | C <sub>9</sub> H <sub>15</sub> NO <sub>11</sub>                |
| 392.0448 | C <sub>9</sub> H <sub>15</sub> NO <sub>15</sub> [ <sup>15</sup> N]-                | C <sub>9</sub> H <sub>15</sub> NO <sub>12</sub>                |
| 408.0397 | C <sub>9</sub> H <sub>15</sub> NO <sub>16</sub> [ <sup>15</sup> N]-                | C <sub>9</sub> H <sub>15</sub> NO <sub>13</sub>                |
| 424.0347 | C <sub>9</sub> H <sub>15</sub> NO <sub>17</sub> [ <sup>15</sup> N]-                | C <sub>9</sub> H <sub>15</sub> NO <sub>14</sub>                |
| 375.0659 | C <sub>9</sub> H <sub>16</sub> N <sub>2</sub> O <sub>13</sub> [ <sup>15</sup> N]-  | C <sub>9</sub> H <sub>16</sub> N <sub>2</sub> O <sub>10</sub>  |
| 391.0608 | C <sub>9</sub> H <sub>16</sub> N <sub>2</sub> O <sub>14</sub> [ <sup>15</sup> N]-  | C <sub>9</sub> H <sub>16</sub> N <sub>2</sub> O <sub>11</sub>  |
| 283.0801 | C <sub>9</sub> H <sub>16</sub> O <sub>9</sub> [ <sup>15</sup> N]-                  | C <sub>9</sub> H <sub>16</sub> O <sub>6</sub>                  |
| 315.0699 | C <sub>9</sub> H <sub>16</sub> O <sub>11</sub> [ <sup>15</sup> N]-                 | C <sub>9</sub> H <sub>16</sub> O <sub>8</sub>                  |
| 347.0597 | C <sub>9</sub> H <sub>16</sub> O <sub>13</sub> [ <sup>15</sup> N]-                 | C <sub>9</sub> H <sub>16</sub> O <sub>10</sub>                 |
| 363.0547 | C <sub>9</sub> H <sub>16</sub> O <sub>14</sub> [ <sup>15</sup> N]-                 | C <sub>9</sub> H <sub>16</sub> O <sub>11</sub>                 |
| 379.0496 | C <sub>9</sub> H <sub>16</sub> O <sub>15</sub> [ <sup>15</sup> N]-                 | C <sub>9</sub> H <sub>16</sub> O <sub>12</sub>                 |
| 314.0859 | C <sub>9</sub> H <sub>17</sub> NO <sub>10</sub> [ <sup>15</sup> N]-                | C <sub>9</sub> H <sub>17</sub> NO <sub>7</sub>                 |
| 330.0808 | C <sub>9</sub> H <sub>17</sub> NO <sub>11</sub> [ <sup>15</sup> N]-                | C <sub>9</sub> H <sub>17</sub> NO <sub>8</sub>                 |
| 338.0495 | C <sub>10</sub> H <sub>13</sub> NO <sub>11</sub> [ <sup>15</sup> N]-               | C <sub>10</sub> H <sub>13</sub> NO <sub>8</sub>                |
| 386.0343 | C <sub>10</sub> H <sub>13</sub> NO <sub>14</sub> [ <sup>15</sup> N]-               | C <sub>10</sub> H <sub>13</sub> NO <sub>11</sub>               |
| 418.0241 | C <sub>10</sub> H <sub>13</sub> NO <sub>16</sub> [ <sup>15</sup> N]-               | C <sub>10</sub> H <sub>13</sub> NO <sub>13</sub>               |
| 369.0553 | C <sub>10</sub> H <sub>14</sub> N <sub>2</sub> O <sub>12</sub> [ <sup>15</sup> N]- | C <sub>10</sub> H <sub>14</sub> N <sub>2</sub> O <sub>9</sub>  |
| 385.0502 | C <sub>10</sub> H <sub>14</sub> N <sub>2</sub> O <sub>13</sub> [ <sup>15</sup> N]- | C <sub>10</sub> H <sub>14</sub> N <sub>2</sub> O <sub>10</sub> |
| 401.0452 | C <sub>10</sub> H <sub>14</sub> N <sub>2</sub> O <sub>14</sub> [ <sup>15</sup> N]- | C <sub>10</sub> H <sub>14</sub> N <sub>2</sub> O <sub>11</sub> |
| 417.0401 | C <sub>10</sub> H <sub>14</sub> N <sub>2</sub> O <sub>15</sub> [ <sup>15</sup> N]- | C <sub>10</sub> H <sub>14</sub> N <sub>2</sub> O <sub>12</sub> |
| 465.0248 | C <sub>10</sub> H <sub>14</sub> N <sub>2</sub> O <sub>18</sub> [ <sup>15</sup> N]- | C <sub>10</sub> H <sub>14</sub> N <sub>2</sub> O <sub>15</sub> |
| 277.0695 | C <sub>10</sub> H <sub>14</sub> O <sub>8</sub> [ <sup>15</sup> N]-                 | C <sub>10</sub> H <sub>14</sub> O <sub>5</sub>                 |
| 309.0594 | C <sub>10</sub> H <sub>14</sub> O <sub>10</sub> [ <sup>15</sup> N]-                | C <sub>10</sub> H <sub>14</sub> O <sub>7</sub>                 |
| 325.0543 | C <sub>10</sub> H <sub>14</sub> O <sub>11</sub> [ <sup>15</sup> N]-                | C <sub>10</sub> H <sub>14</sub> O <sub>8</sub>                 |
| 341.0492 | C <sub>10</sub> H <sub>14</sub> O <sub>12</sub> [ <sup>15</sup> N]-                | C <sub>10</sub> H <sub>14</sub> O <sub>9</sub>                 |
| 357.0441 | C <sub>10</sub> H <sub>14</sub> O <sub>13</sub> [ <sup>15</sup> N]-                | C <sub>10</sub> H <sub>14</sub> O <sub>10</sub>                |
| 373.0390 | C <sub>10</sub> H <sub>14</sub> O <sub>14</sub> [ <sup>15</sup> N]-                | C <sub>10</sub> H <sub>14</sub> O <sub>11</sub>                |
| 389.0339 | C <sub>10</sub> H <sub>14</sub> O <sub>15</sub> [ <sup>15</sup> N]-                | C <sub>10</sub> H <sub>14</sub> O <sub>12</sub>                |
| 405.0288 | C <sub>10</sub> H <sub>14</sub> O <sub>16</sub> [ <sup>15</sup> N]-                | C <sub>10</sub> H <sub>14</sub> O <sub>13</sub>                |
| 421.0238 | C <sub>10</sub> H <sub>14</sub> O <sub>17</sub> [ <sup>15</sup> N]-                | C <sub>10</sub> H <sub>14</sub> O <sub>14</sub>                |
| 453.0136 | C <sub>10</sub> H <sub>14</sub> O <sub>19</sub> [ <sup>15</sup> N]-                | C <sub>10</sub> H <sub>14</sub> O <sub>16</sub>                |
| 340.0652 | C <sub>10</sub> H <sub>15</sub> NO <sub>11</sub> [ <sup>15</sup> N]-               | C <sub>10</sub> H <sub>15</sub> NO <sub>8</sub>                |
| 356.0601 | C <sub>10</sub> H <sub>15</sub> NO <sub>12</sub> [ <sup>15</sup> N]-               | C <sub>10</sub> H <sub>15</sub> NO <sub>9</sub>                |

|          |                                                                      |                                                  |
|----------|----------------------------------------------------------------------|--------------------------------------------------|
| 372.0550 | C <sub>10</sub> H <sub>15</sub> NO <sub>13</sub> [ <sup>15</sup> N]- | C <sub>10</sub> H <sub>15</sub> NO <sub>10</sub> |
| 388.0499 | C <sub>10</sub> H <sub>15</sub> NO <sub>14</sub> [ <sup>15</sup> N]- | C <sub>10</sub> H <sub>15</sub> NO <sub>11</sub> |
| 404.0448 | C <sub>10</sub> H <sub>15</sub> NO <sub>15</sub> [ <sup>15</sup> N]- | C <sub>10</sub> H <sub>15</sub> NO <sub>12</sub> |
| 420.0397 | C <sub>10</sub> H <sub>15</sub> NO <sub>16</sub> [ <sup>15</sup> N]- | C <sub>10</sub> H <sub>15</sub> NO <sub>13</sub> |
| 436.0347 | C <sub>10</sub> H <sub>15</sub> NO <sub>17</sub> [ <sup>15</sup> N]- | C <sub>10</sub> H <sub>15</sub> NO <sub>14</sub> |
| 468.0245 | C <sub>10</sub> H <sub>15</sub> NO <sub>19</sub> [ <sup>15</sup> N]- | C <sub>10</sub> H <sub>15</sub> NO <sub>16</sub> |
| 294.0723 | C <sub>10</sub> H <sub>15</sub> O <sub>9</sub> [ <sup>15</sup> N]-   | C <sub>10</sub> H <sub>15</sub> O <sub>6</sub>   |
| 310.0672 | C <sub>10</sub> H <sub>15</sub> O <sub>10</sub> [ <sup>15</sup> N]-  | C <sub>10</sub> H <sub>15</sub> O <sub>7</sub>   |
| 326.0621 | C <sub>10</sub> H <sub>15</sub> O <sub>11</sub> [ <sup>15</sup> N]-  | C <sub>10</sub> H <sub>15</sub> O <sub>8</sub>   |
| 342.0570 | C <sub>10</sub> H <sub>15</sub> O <sub>12</sub> [ <sup>15</sup> N]-  | C <sub>10</sub> H <sub>15</sub> O <sub>9</sub>   |
| 358.0519 | C <sub>10</sub> H <sub>15</sub> O <sub>13</sub> [ <sup>15</sup> N]-  | C <sub>10</sub> H <sub>15</sub> O <sub>10</sub>  |
| 374.0468 | C <sub>10</sub> H <sub>15</sub> O <sub>14</sub> [ <sup>15</sup> N]-  | C <sub>10</sub> H <sub>15</sub> O <sub>11</sub>  |
| 390.0418 | C <sub>10</sub> H <sub>15</sub> O <sub>15</sub> [ <sup>15</sup> N]-  | C <sub>10</sub> H <sub>15</sub> O <sub>12</sub>  |
| 422.0316 | C <sub>10</sub> H <sub>15</sub> O <sub>17</sub> [ <sup>15</sup> N]-  | C <sub>10</sub> H <sub>15</sub> O <sub>14</sub>  |
| 438.0265 | C <sub>10</sub> H <sub>15</sub> O <sub>18</sub> [ <sup>15</sup> N]-  | C <sub>10</sub> H <sub>15</sub> O <sub>15</sub>  |
| 454.0214 | C <sub>10</sub> H <sub>15</sub> O <sub>19</sub> [ <sup>15</sup> N]-  | C <sub>10</sub> H <sub>15</sub> O <sub>16</sub>  |
| 279.0852 | C <sub>10</sub> H <sub>16</sub> O <sub>8</sub> [ <sup>15</sup> N]-   | C <sub>10</sub> H <sub>16</sub> O <sub>5</sub>   |
| 295.0801 | C <sub>10</sub> H <sub>16</sub> O <sub>9</sub> [ <sup>15</sup> N]-   | C <sub>10</sub> H <sub>16</sub> O <sub>6</sub>   |
| 327.0699 | C <sub>10</sub> H <sub>16</sub> O <sub>11</sub> [ <sup>15</sup> N]-  | C <sub>10</sub> H <sub>16</sub> O <sub>8</sub>   |
| 343.0648 | C <sub>10</sub> H <sub>16</sub> O <sub>12</sub> [ <sup>15</sup> N]-  | C <sub>10</sub> H <sub>16</sub> O <sub>9</sub>   |
| 359.0597 | C <sub>10</sub> H <sub>16</sub> O <sub>13</sub> [ <sup>15</sup> N]-  | C <sub>10</sub> H <sub>16</sub> O <sub>10</sub>  |
| 375.0547 | C <sub>10</sub> H <sub>16</sub> O <sub>14</sub> [ <sup>15</sup> N]-  | C <sub>10</sub> H <sub>16</sub> O <sub>11</sub>  |
| 391.0496 | C <sub>10</sub> H <sub>16</sub> O <sub>15</sub> [ <sup>15</sup> N]-  | C <sub>10</sub> H <sub>16</sub> O <sub>12</sub>  |
| 407.0445 | C <sub>10</sub> H <sub>16</sub> O <sub>16</sub> [ <sup>15</sup> N]-  | C <sub>10</sub> H <sub>16</sub> O <sub>13</sub>  |
| 423.0394 | C <sub>10</sub> H <sub>16</sub> O <sub>17</sub> [ <sup>15</sup> N]-  | C <sub>10</sub> H <sub>16</sub> O <sub>14</sub>  |
| 439.0343 | C <sub>10</sub> H <sub>16</sub> O <sub>18</sub> [ <sup>15</sup> N]-  | C <sub>10</sub> H <sub>16</sub> O <sub>15</sub>  |
| 294.0961 | C <sub>10</sub> H <sub>17</sub> NO <sub>8</sub> [ <sup>15</sup> N]-  | C <sub>10</sub> H <sub>17</sub> NO <sub>5</sub>  |
| 310.0910 | C <sub>10</sub> H <sub>17</sub> NO <sub>9</sub> [ <sup>15</sup> N]-  | C <sub>10</sub> H <sub>17</sub> NO <sub>6</sub>  |
| 326.0859 | C <sub>10</sub> H <sub>17</sub> NO <sub>10</sub> [ <sup>15</sup> N]- | C <sub>10</sub> H <sub>17</sub> NO <sub>7</sub>  |
| 342.0808 | C <sub>10</sub> H <sub>17</sub> NO <sub>11</sub> [ <sup>15</sup> N]- | C <sub>10</sub> H <sub>17</sub> NO <sub>8</sub>  |
| 358.0757 | C <sub>10</sub> H <sub>17</sub> NO <sub>12</sub> [ <sup>15</sup> N]- | C <sub>10</sub> H <sub>17</sub> NO <sub>9</sub>  |
| 374.0706 | C <sub>10</sub> H <sub>17</sub> NO <sub>13</sub> [ <sup>15</sup> N]- | C <sub>10</sub> H <sub>17</sub> NO <sub>10</sub> |
| 390.0656 | C <sub>10</sub> H <sub>17</sub> NO <sub>14</sub> [ <sup>15</sup> N]- | C <sub>10</sub> H <sub>17</sub> NO <sub>11</sub> |
| 406.0605 | C <sub>10</sub> H <sub>17</sub> NO <sub>15</sub> [ <sup>15</sup> N]- | C <sub>10</sub> H <sub>17</sub> NO <sub>12</sub> |
| 422.0554 | C <sub>10</sub> H <sub>17</sub> NO <sub>16</sub> [ <sup>15</sup> N]- | C <sub>10</sub> H <sub>17</sub> NO <sub>13</sub> |
| 438.0503 | C <sub>10</sub> H <sub>17</sub> NO <sub>17</sub> [ <sup>15</sup> N]- | C <sub>10</sub> H <sub>17</sub> NO <sub>14</sub> |
| 454.0452 | C <sub>10</sub> H <sub>17</sub> NO <sub>18</sub> [ <sup>15</sup> N]- | C <sub>10</sub> H <sub>17</sub> NO <sub>15</sub> |
| 264.0981 | C <sub>10</sub> H <sub>17</sub> O <sub>7</sub> [ <sup>15</sup> N]-   | C <sub>10</sub> H <sub>17</sub> O <sub>4</sub>   |
| 280.0930 | C <sub>10</sub> H <sub>17</sub> O <sub>8</sub> [ <sup>15</sup> N]-   | C <sub>10</sub> H <sub>17</sub> O <sub>5</sub>   |
| 296.0879 | C <sub>10</sub> H <sub>17</sub> O <sub>9</sub> [ <sup>15</sup> N]-   | C <sub>10</sub> H <sub>17</sub> O <sub>6</sub>   |
| 312.0828 | C <sub>10</sub> H <sub>17</sub> O <sub>10</sub> [ <sup>15</sup> N]-  | C <sub>10</sub> H <sub>17</sub> O <sub>7</sub>   |
| 392.0574 | C <sub>10</sub> H <sub>17</sub> O <sub>15</sub> [ <sup>15</sup> N]-  | C <sub>10</sub> H <sub>17</sub> O <sub>12</sub>  |
| 408.0523 | C <sub>10</sub> H <sub>17</sub> O <sub>16</sub> [ <sup>15</sup> N]-  | C <sub>10</sub> H <sub>17</sub> O <sub>13</sub>  |

|          |                                                                                    |                                                                |
|----------|------------------------------------------------------------------------------------|----------------------------------------------------------------|
| 424.0472 | C <sub>10</sub> H <sub>17</sub> O <sub>17</sub> [ <sup>15</sup> N]-                | C <sub>10</sub> H <sub>17</sub> O <sub>14</sub>                |
| 440.0421 | C <sub>10</sub> H <sub>17</sub> O <sub>18</sub> [ <sup>15</sup> N]-                | C <sub>10</sub> H <sub>17</sub> O <sub>15</sub>                |
| 357.0917 | C <sub>10</sub> H <sub>18</sub> N <sub>2</sub> O <sub>11</sub> [ <sup>15</sup> N]- | C <sub>10</sub> H <sub>18</sub> N <sub>2</sub> O <sub>8</sub>  |
| 389.0815 | C <sub>10</sub> H <sub>18</sub> N <sub>2</sub> O <sub>13</sub> [ <sup>15</sup> N]- | C <sub>10</sub> H <sub>18</sub> N <sub>2</sub> O <sub>10</sub> |
| 405.0765 | C <sub>10</sub> H <sub>18</sub> N <sub>2</sub> O <sub>14</sub> [ <sup>15</sup> N]- | C <sub>10</sub> H <sub>18</sub> N <sub>2</sub> O <sub>11</sub> |
| 421.0714 | C <sub>10</sub> H <sub>18</sub> N <sub>2</sub> O <sub>15</sub> [ <sup>15</sup> N]- | C <sub>10</sub> H <sub>18</sub> N <sub>2</sub> O <sub>12</sub> |
| 453.0612 | C <sub>10</sub> H <sub>18</sub> N <sub>2</sub> O <sub>17</sub> [ <sup>15</sup> N]- | C <sub>10</sub> H <sub>18</sub> N <sub>2</sub> O <sub>14</sub> |
| 517.0409 | C <sub>10</sub> H <sub>18</sub> N <sub>2</sub> O <sub>21</sub> [ <sup>15</sup> N]- | C <sub>10</sub> H <sub>18</sub> N <sub>2</sub> O <sub>18</sub> |
| 621.0770 | C <sub>15</sub> H <sub>26</sub> O <sub>25</sub> [ <sup>15</sup> N]-                | C <sub>15</sub> H <sub>26</sub> O <sub>22</sub>                |
| 620.0930 | C <sub>15</sub> H <sub>27</sub> NO <sub>24</sub> [ <sup>15</sup> N]-               | C <sub>15</sub> H <sub>27</sub> NO <sub>21</sub>               |
| 638.1035 | C <sub>15</sub> H <sub>29</sub> NO <sub>25</sub> [ <sup>15</sup> N]-               | C <sub>15</sub> H <sub>29</sub> NO <sub>22</sub>               |
| 653.1144 | C <sub>15</sub> H <sub>30</sub> N <sub>2</sub> O <sub>25</sub> [ <sup>15</sup> N]- | C <sub>15</sub> H <sub>30</sub> N <sub>2</sub> O <sub>22</sub> |
| 480.1700 | C <sub>15</sub> H <sub>31</sub> NO <sub>15</sub> [ <sup>15</sup> N]-               | C <sub>15</sub> H <sub>31</sub> NO <sub>12</sub>               |
| 652.1192 | C <sub>16</sub> H <sub>31</sub> NO <sub>25</sub> [ <sup>15</sup> N]-               | C <sub>16</sub> H <sub>31</sub> NO <sub>22</sub>               |
| 531.0969 | C <sub>17</sub> H <sub>24</sub> O <sub>18</sub> [ <sup>15</sup> N]-                | C <sub>17</sub> H <sub>24</sub> O <sub>15</sub>                |
| 563.0868 | C <sub>17</sub> H <sub>24</sub> O <sub>20</sub> [ <sup>15</sup> N]-                | C <sub>17</sub> H <sub>24</sub> O <sub>17</sub>                |
| 501.1227 | C <sub>17</sub> H <sub>26</sub> O <sub>16</sub> [ <sup>15</sup> N]-                | C <sub>17</sub> H <sub>26</sub> O <sub>13</sub>                |
| 533.1126 | C <sub>17</sub> H <sub>26</sub> O <sub>18</sub> [ <sup>15</sup> N]-                | C <sub>17</sub> H <sub>26</sub> O <sub>15</sub>                |
| 565.1024 | C <sub>17</sub> H <sub>26</sub> O <sub>20</sub> [ <sup>15</sup> N]-                | C <sub>17</sub> H <sub>26</sub> O <sub>17</sub>                |
| 503.1384 | C <sub>17</sub> H <sub>28</sub> O <sub>16</sub> [ <sup>15</sup> N]-                | C <sub>17</sub> H <sub>28</sub> O <sub>13</sub>                |
| 651.1239 | C <sub>17</sub> H <sub>32</sub> O <sub>25</sub> [ <sup>15</sup> N]-                | C <sub>17</sub> H <sub>32</sub> O <sub>22</sub>                |
| 543.0969 | C <sub>18</sub> H <sub>24</sub> O <sub>18</sub> [ <sup>15</sup> N]-                | C <sub>18</sub> H <sub>24</sub> O <sub>15</sub>                |
| 545.1126 | C <sub>18</sub> H <sub>26</sub> O <sub>18</sub> [ <sup>15</sup> N]-                | C <sub>18</sub> H <sub>26</sub> O <sub>15</sub>                |
| 561.1075 | C <sub>18</sub> H <sub>26</sub> O <sub>19</sub> [ <sup>15</sup> N]-                | C <sub>18</sub> H <sub>26</sub> O <sub>16</sub>                |
| 560.1235 | C <sub>18</sub> H <sub>27</sub> NO <sub>18</sub> [ <sup>15</sup> N]-               | C <sub>18</sub> H <sub>27</sub> NO <sub>15</sub>               |
| 515.1384 | C <sub>18</sub> H <sub>28</sub> O <sub>16</sub> [ <sup>15</sup> N]-                | C <sub>18</sub> H <sub>28</sub> O <sub>13</sub>                |
| 517.1540 | C <sub>18</sub> H <sub>30</sub> O <sub>16</sub> [ <sup>15</sup> N]-                | C <sub>18</sub> H <sub>30</sub> O <sub>13</sub>                |
| 493.1329 | C <sub>19</sub> H <sub>26</sub> O <sub>14</sub> [ <sup>15</sup> N]-                | C <sub>19</sub> H <sub>26</sub> O <sub>11</sub>                |
| 541.1177 | C <sub>19</sub> H <sub>26</sub> O <sub>17</sub> [ <sup>15</sup> N]-                | C <sub>19</sub> H <sub>26</sub> O <sub>14</sub>                |
| 495.1486 | C <sub>19</sub> H <sub>28</sub> O <sub>14</sub> [ <sup>15</sup> N]-                | C <sub>19</sub> H <sub>28</sub> O <sub>11</sub>                |
| 559.1282 | C <sub>19</sub> H <sub>28</sub> O <sub>18</sub> [ <sup>15</sup> N]-                | C <sub>19</sub> H <sub>28</sub> O <sub>15</sub>                |
| 575.1231 | C <sub>19</sub> H <sub>28</sub> O <sub>19</sub> [ <sup>15</sup> N]-                | C <sub>19</sub> H <sub>28</sub> O <sub>16</sub>                |
| 591.1181 | C <sub>19</sub> H <sub>28</sub> O <sub>20</sub> [ <sup>15</sup> N]-                | C <sub>19</sub> H <sub>28</sub> O <sub>17</sub>                |
| 558.1442 | C <sub>19</sub> H <sub>29</sub> NO <sub>17</sub> [ <sup>15</sup> N]-               | C <sub>19</sub> H <sub>29</sub> NO <sub>14</sub>               |
| 497.1642 | C <sub>19</sub> H <sub>30</sub> O <sub>14</sub> [ <sup>15</sup> N]-                | C <sub>19</sub> H <sub>30</sub> O <sub>11</sub>                |
| 611.1443 | C <sub>19</sub> H <sub>32</sub> O <sub>21</sub> [ <sup>15</sup> N]-                | C <sub>19</sub> H <sub>32</sub> O <sub>18</sub>                |
| 525.1591 | C <sub>20</sub> H <sub>30</sub> O <sub>15</sub> [ <sup>15</sup> N]-                | C <sub>20</sub> H <sub>30</sub> O <sub>12</sub>                |
| 557.1490 | C <sub>20</sub> H <sub>30</sub> O <sub>17</sub> [ <sup>15</sup> N]-                | C <sub>20</sub> H <sub>30</sub> O <sub>14</sub>                |
| 573.1439 | C <sub>20</sub> H <sub>30</sub> O <sub>18</sub> [ <sup>15</sup> N]-                | C <sub>20</sub> H <sub>30</sub> O <sub>15</sub>                |
| 589.1388 | C <sub>20</sub> H <sub>30</sub> O <sub>19</sub> [ <sup>15</sup> N]-                | C <sub>20</sub> H <sub>30</sub> O <sub>16</sub>                |
| 588.1548 | C <sub>20</sub> H <sub>31</sub> NO <sub>18</sub> [ <sup>15</sup> N]-               | C <sub>20</sub> H <sub>31</sub> NO <sub>15</sub>               |
| 511.1799 | C <sub>20</sub> H <sub>32</sub> O <sub>14</sub> [ <sup>15</sup> N]-                | C <sub>20</sub> H <sub>32</sub> O <sub>11</sub>                |
| 527.1748 | C <sub>20</sub> H <sub>32</sub> O <sub>15</sub> [ <sup>15</sup> N]-                | C <sub>20</sub> H <sub>32</sub> O <sub>12</sub>                |

|          |                                  |                         |
|----------|----------------------------------|-------------------------|
| 543.1697 | $C_{20}H_{32}O_{16}[^{15}N]-$    | $C_{20}H_{32}O_{13}$    |
| 591.1544 | $C_{20}H_{32}O_{19}[^{15}N]-$    | $C_{20}H_{32}O_{16}$    |
| 607.1494 | $C_{20}H_{32}O_{20}[^{15}N]-$    | $C_{20}H_{32}O_{17}$    |
| 623.1443 | $C_{20}H_{32}O_{21}[^{15}N]-$    | $C_{20}H_{32}O_{18}$    |
| 621.1762 | $C_{20}H_{34}N_2O_{19}[^{15}N]-$ | $C_{20}H_{34}N_2O_{16}$ |
| 637.1711 | $C_{20}H_{34}N_2O_{20}[^{15}N]-$ | $C_{20}H_{34}N_2O_{17}$ |
| 513.1955 | $C_{20}H_{34}O_{14}[^{15}N]-$    | $C_{20}H_{34}O_{11}$    |
| 529.1904 | $C_{20}H_{34}O_{15}[^{15}N]-$    | $C_{20}H_{34}O_{12}$    |
| 545.1853 | $C_{20}H_{34}O_{16}[^{15}N]-$    | $C_{20}H_{34}O_{13}$    |
| 561.1803 | $C_{20}H_{34}O_{17}[^{15}N]-$    | $C_{20}H_{34}O_{14}$    |
| 577.1752 | $C_{20}H_{34}O_{18}[^{15}N]-$    | $C_{20}H_{34}O_{15}$    |

228

229 **Table S6.** Normalized average signal of C<sub>10</sub>H<sub>15</sub>O<sub>x</sub>• radical and their termination products in high NO conditions.

230 The percentage value is the average signal of each peak normalized to that of C<sub>10</sub>H<sub>17</sub>NO<sub>9</sub> in 15 mins after the  
 231 louvres opening. “M”, “M-17”, “M-15” and “M+1” represent the molecular weight of the RO<sub>2</sub> and their respective  
 232 termination products with RO<sub>2</sub>, HO<sub>2</sub> and NO.

| RO <sub>2</sub>                                          | RC=O                                                     | ROH                                                      | ROOH                                                     | RONO <sub>2</sub>                                         |
|----------------------------------------------------------|----------------------------------------------------------|----------------------------------------------------------|----------------------------------------------------------|-----------------------------------------------------------|
| C <sub>10</sub> H <sub>15</sub> O <sub>6</sub><br>2.4%   |                                                          | C <sub>10</sub> H <sub>16</sub> O <sub>5</sub><br>15.7%  | C <sub>10</sub> H <sub>16</sub> O <sub>6</sub><br>9.0%   |                                                           |
| C <sub>10</sub> H <sub>15</sub> O <sub>7</sub><br>7.8%   |                                                          | C <sub>10</sub> H <sub>16</sub> O <sub>6</sub><br>9.0%   |                                                          | C <sub>10</sub> H <sub>15</sub> NO <sub>8</sub><br>34.6%  |
| C <sub>10</sub> H <sub>15</sub> O <sub>8</sub><br>14.7%  | C <sub>10</sub> H <sub>14</sub> O <sub>7</sub><br>10.2%  |                                                          | C <sub>10</sub> H <sub>16</sub> O <sub>8</sub><br>52.7%  | C <sub>10</sub> H <sub>15</sub> NO <sub>9</sub><br>49.7%  |
| C <sub>10</sub> H <sub>15</sub> O <sub>9</sub><br>27.9%  | C <sub>10</sub> H <sub>14</sub> O <sub>8</sub><br>44.4%  | C <sub>10</sub> H <sub>16</sub> O <sub>8</sub><br>52.7%  | C <sub>10</sub> H <sub>16</sub> O <sub>9</sub><br>38.8%  | C <sub>10</sub> H <sub>15</sub> NO <sub>10</sub><br>51.0% |
| C <sub>10</sub> H <sub>15</sub> O <sub>10</sub><br>17.8% | C <sub>10</sub> H <sub>14</sub> O <sub>9</sub><br>11.9%  | C <sub>10</sub> H <sub>16</sub> O <sub>9</sub><br>38.8%  | C <sub>10</sub> H <sub>16</sub> O <sub>10</sub><br>21.0% | C <sub>10</sub> H <sub>15</sub> NO <sub>11</sub><br>25.6% |
| C <sub>10</sub> H <sub>15</sub> O <sub>11</sub><br>11.4% | C <sub>10</sub> H <sub>14</sub> O <sub>10</sub><br>18.8% | C <sub>10</sub> H <sub>16</sub> O <sub>10</sub><br>21.0% | C <sub>10</sub> H <sub>16</sub> O <sub>11</sub><br>4.3%  | C <sub>10</sub> H <sub>15</sub> NO <sub>12</sub><br>10.3% |
| C <sub>10</sub> H <sub>15</sub> O <sub>12</sub><br>5.5%  | C <sub>10</sub> H <sub>14</sub> O <sub>11</sub><br>10.7% | C <sub>10</sub> H <sub>16</sub> O <sub>11</sub><br>4.3%  | C <sub>10</sub> H <sub>16</sub> O <sub>12</sub><br>2.0%  | C <sub>10</sub> H <sub>15</sub> NO <sub>13</sub><br>7.8%  |
| C <sub>10</sub> H <sub>15</sub> O <sub>13</sub><br>5.3%  | C <sub>10</sub> H <sub>14</sub> O <sub>12</sub><br>9.1%  | C <sub>10</sub> H <sub>16</sub> O <sub>12</sub><br>2.0%  | C <sub>10</sub> H <sub>16</sub> O <sub>13</sub><br>10.8% | C <sub>10</sub> H <sub>15</sub> NO <sub>14</sub><br>3.4%  |
| C <sub>10</sub> H <sub>15</sub> O <sub>14</sub><br>1.8%  | C <sub>10</sub> H <sub>14</sub> O <sub>13</sub><br>4.4%  | C <sub>10</sub> H <sub>16</sub> O <sub>13</sub><br>10.8% | C <sub>10</sub> H <sub>16</sub> O <sub>14</sub><br>3.3%  |                                                           |
| C <sub>10</sub> H <sub>15</sub> O <sub>15</sub><br>0.5%  | C <sub>10</sub> H <sub>14</sub> O <sub>14</sub><br>4.3%  | C <sub>10</sub> H <sub>16</sub> O <sub>14</sub><br>3.3%  | C <sub>10</sub> H <sub>16</sub> O <sub>15</sub><br>1.6%  | C <sub>10</sub> H <sub>15</sub> NO <sub>16</sub><br>1.0%  |
|                                                          |                                                          | C <sub>10</sub> H <sub>16</sub> O <sub>15</sub><br>1.6%  |                                                          |                                                           |

233



234 **Table S7.** Normalized average signal of C<sub>10</sub>H<sub>17</sub>O<sub>x</sub>• radical and their termination products in high NO conditions.  
 235 The percentage value is the average signal of each peak normalized to that of C<sub>10</sub>H<sub>17</sub>NO<sub>9</sub> in 15 mins after the  
 236 louvres opening. “M”, “M-17”, “M-15” and “M+1” represent the molecular weight of the RO<sub>2</sub> and their respective  
 237 termination products with RO<sub>2</sub>, HO<sub>2</sub> and NO.

| RO <sub>2</sub>                                          | RC=O                                                     | ROH                                                     | ROOH                                                    | RONO <sub>2</sub>                                         |
|----------------------------------------------------------|----------------------------------------------------------|---------------------------------------------------------|---------------------------------------------------------|-----------------------------------------------------------|
| C <sub>10</sub> H <sub>17</sub> O <sub>5</sub><br>2.2%   |                                                          |                                                         |                                                         | C <sub>10</sub> H <sub>17</sub> NO <sub>6</sub><br>12.4%  |
| C <sub>10</sub> H <sub>17</sub> O <sub>6</sub><br>7.0%   | C <sub>10</sub> H <sub>16</sub> O <sub>5</sub><br>15.7%  |                                                         |                                                         | C <sub>10</sub> H <sub>17</sub> NO <sub>7</sub><br>19.8%  |
| C <sub>10</sub> H <sub>17</sub> O <sub>7</sub><br>14.0%  | C <sub>10</sub> H <sub>16</sub> O <sub>6</sub><br>9.0%   |                                                         |                                                         | C <sub>10</sub> H <sub>17</sub> NO <sub>8</sub><br>93.6%  |
| C <sub>10</sub> H <sub>17</sub> O <sub>8</sub><br>11.8%  |                                                          |                                                         |                                                         | C <sub>10</sub> H <sub>17</sub> NO <sub>9</sub><br>100.0% |
| C <sub>10</sub> H <sub>17</sub> O <sub>9</sub><br>13.8%  | C <sub>10</sub> H <sub>16</sub> O <sub>8</sub><br>52.7%  |                                                         |                                                         | C <sub>10</sub> H <sub>17</sub> NO <sub>10</sub><br>70.8% |
| C <sub>10</sub> H <sub>17</sub> O <sub>10</sub><br>15.7% | C <sub>10</sub> H <sub>16</sub> O <sub>9</sub><br>38.8%  |                                                         | C <sub>10</sub> H <sub>18</sub> O <sub>10</sub><br>9.3% | C <sub>10</sub> H <sub>17</sub> NO <sub>11</sub><br>27.8% |
| C <sub>10</sub> H <sub>17</sub> O <sub>11</sub><br>11.3% | C <sub>10</sub> H <sub>16</sub> O <sub>10</sub><br>21.0% | C <sub>10</sub> H <sub>18</sub> O <sub>10</sub><br>9.3% |                                                         | C <sub>10</sub> H <sub>17</sub> NO <sub>12</sub><br>20.3% |
| C <sub>10</sub> H <sub>17</sub> O <sub>12</sub><br>6.1%  | C <sub>10</sub> H <sub>16</sub> O <sub>11</sub><br>4.3%  |                                                         |                                                         | C <sub>10</sub> H <sub>17</sub> NO <sub>13</sub><br>9.7%  |
| C <sub>10</sub> H <sub>17</sub> O <sub>13</sub><br>4.6%  | C <sub>10</sub> H <sub>16</sub> O <sub>12</sub><br>2.0%  |                                                         |                                                         | C <sub>10</sub> H <sub>17</sub> NO <sub>14</sub><br>2.0%  |
| C <sub>10</sub> H <sub>17</sub> O <sub>14</sub><br>1.6%  | C <sub>10</sub> H <sub>16</sub> O <sub>13</sub><br>10.8% |                                                         |                                                         | C <sub>10</sub> H <sub>17</sub> NO <sub>15</sub><br>0.5%  |

238

239  
240

**Table S8.** Normalized average signal of dimer products in low NO conditions. The percentage value is the average signal of each peak normalized to that of C<sub>10</sub>H<sub>16</sub>O<sub>8</sub> in 15 mins after the louvres opening.

| C20 dimer families                              |                                                 |                                                 |
|-------------------------------------------------|-------------------------------------------------|-------------------------------------------------|
| C <sub>20</sub> H <sub>30</sub> O <sub>x</sub>  | C <sub>20</sub> H <sub>32</sub> O <sub>x</sub>  | C <sub>20</sub> H <sub>34</sub> O <sub>x</sub>  |
| C <sub>20</sub> H <sub>30</sub> O <sub>10</sub> | C <sub>20</sub> H <sub>32</sub> O <sub>9</sub>  | C <sub>20</sub> H <sub>34</sub> O <sub>10</sub> |
| 1.1%                                            | 2.7%                                            | 7.9%                                            |
| C <sub>20</sub> H <sub>30</sub> O <sub>11</sub> | C <sub>20</sub> H <sub>32</sub> O <sub>10</sub> | C <sub>20</sub> H <sub>34</sub> O <sub>11</sub> |
| 1.2%                                            | 3.7%                                            | 4.9%                                            |
|                                                 | C <sub>20</sub> H <sub>32</sub> O <sub>11</sub> | C <sub>20</sub> H <sub>34</sub> O <sub>12</sub> |
|                                                 | 8.1%                                            | 9.0%                                            |
|                                                 | C <sub>20</sub> H <sub>32</sub> O <sub>12</sub> | C <sub>20</sub> H <sub>34</sub> O <sub>13</sub> |
|                                                 | 4.2%                                            | 5.9%                                            |
|                                                 |                                                 | C <sub>20</sub> H <sub>34</sub> O <sub>14</sub> |
|                                                 |                                                 | 9.1%                                            |
| C <sub>20</sub> H <sub>30</sub> O <sub>15</sub> | C <sub>20</sub> H <sub>32</sub> O <sub>14</sub> | C <sub>20</sub> H <sub>34</sub> O <sub>15</sub> |
| 2.5%                                            | 4.6%                                            | 2.3%                                            |
| C <sub>20</sub> H <sub>30</sub> O <sub>16</sub> | C <sub>20</sub> H <sub>32</sub> O <sub>15</sub> | C <sub>20</sub> H <sub>34</sub> O <sub>16</sub> |
| 2.7%                                            | 11.8%                                           | 2.8%                                            |
| C <sub>20</sub> H <sub>30</sub> O <sub>17</sub> |                                                 |                                                 |
| 1.4%                                            |                                                 |                                                 |
|                                                 | C <sub>20</sub> H <sub>32</sub> O <sub>17</sub> |                                                 |
|                                                 | 4.6%                                            |                                                 |

241

242  
243

**Table S9.** Normalized average signal of dimer products in high NO conditions. The percentage value is the average signal of each peak normalized to that of C<sub>10</sub>H<sub>17</sub>NO<sub>9</sub> in 15 mins after the louvres opening.

| C <sub>20</sub> H <sub>30</sub> O <sub>x</sub>  | C <sub>20</sub> H <sub>32</sub> O <sub>x</sub>  | C <sub>20</sub> H <sub>34</sub> O <sub>x</sub>  |
|-------------------------------------------------|-------------------------------------------------|-------------------------------------------------|
|                                                 |                                                 | C <sub>20</sub> H <sub>34</sub> O <sub>11</sub> |
|                                                 |                                                 | 0.2%                                            |
| C <sub>20</sub> H <sub>30</sub> O <sub>12</sub> | C <sub>20</sub> H <sub>32</sub> O <sub>11</sub> | C <sub>20</sub> H <sub>34</sub> O <sub>12</sub> |
| 0.3%                                            | 0.4%                                            | 0.7%                                            |
|                                                 | C <sub>20</sub> H <sub>32</sub> O <sub>12</sub> | C <sub>20</sub> H <sub>34</sub> O <sub>13</sub> |
|                                                 | 0.5%                                            | 0.2%                                            |
| C <sub>20</sub> H <sub>30</sub> O <sub>14</sub> | C <sub>20</sub> H <sub>32</sub> O <sub>13</sub> | C <sub>20</sub> H <sub>34</sub> O <sub>14</sub> |
| 0.6%                                            | 0.1%                                            | 0.2%                                            |
| C <sub>20</sub> H <sub>30</sub> O <sub>15</sub> |                                                 | C <sub>20</sub> H <sub>34</sub> O <sub>15</sub> |
| 0.7%                                            |                                                 | 0.3%                                            |
| C <sub>20</sub> H <sub>30</sub> O <sub>16</sub> |                                                 |                                                 |
| 0.4%                                            |                                                 |                                                 |
|                                                 | C <sub>20</sub> H <sub>32</sub> O <sub>16</sub> |                                                 |
|                                                 | 0.2%                                            |                                                 |
|                                                 | C <sub>20</sub> H <sub>32</sub> O <sub>17</sub> |                                                 |
|                                                 | 0.6%                                            |                                                 |

244  
245

**Table S10.** Major dimer families and their possible formation pathways.

| Dimer family                                   | Possible formation pathways                                                                                                                                                                                |
|------------------------------------------------|------------------------------------------------------------------------------------------------------------------------------------------------------------------------------------------------------------|
| C <sub>20</sub> H <sub>34</sub> O <sub>x</sub> | C <sub>10</sub> H <sub>17</sub> O <sub>x</sub> • + C <sub>10</sub> H <sub>17</sub> O <sub>x</sub> •                                                                                                        |
| C <sub>20</sub> H <sub>32</sub> O <sub>x</sub> | C <sub>10</sub> H <sub>15</sub> O <sub>x</sub> • + C <sub>10</sub> H <sub>17</sub> O <sub>x</sub> •                                                                                                        |
| C <sub>20</sub> H <sub>30</sub> O <sub>x</sub> | C <sub>10</sub> H <sub>15</sub> O <sub>x</sub> • + C <sub>10</sub> H <sub>15</sub> O <sub>x</sub> •                                                                                                        |
| C <sub>19</sub> H <sub>30</sub> O <sub>x</sub> | C <sub>9</sub> H <sub>15</sub> O <sub>x</sub> • + C <sub>10</sub> H <sub>15</sub> O <sub>x</sub> •<br>/ C <sub>9</sub> H <sub>13</sub> O <sub>x</sub> • + C <sub>10</sub> H <sub>17</sub> O <sub>x</sub> • |
| C <sub>19</sub> H <sub>28</sub> O <sub>x</sub> | C <sub>9</sub> H <sub>13</sub> O <sub>x</sub> • + C <sub>10</sub> H <sub>15</sub> O <sub>x</sub> •                                                                                                         |
| C <sub>19</sub> H <sub>26</sub> O <sub>x</sub> | C <sub>9</sub> H <sub>11</sub> O <sub>x</sub> • + C <sub>10</sub> H <sub>15</sub> O <sub>x</sub> •                                                                                                         |

246  
247

248 **References**

- 249 Bianchi, F., Kurtén, T., Riva, M., Mohr, C., Rissanen, M. P., Roldin, P., Berndt, T.,  
250 Crouse, J. D., Wennberg, P. O., Mentel, T. F., Wildt, J., Junninen, H., Jokinen, T.,  
251 Kulmala, M., Worsnop, D. R., Thornton, J. A., Donahue, N., Kjaergaard, H. G., and  
252 Ehn, M.: Highly Oxygenated Organic Molecules (HOM) from Gas-Phase  
253 Autoxidation Involving Peroxy Radicals: A Key Contributor to Atmospheric Aerosol,  
254 *Chem Rev*, 119, 3472-3509, 10.1021/acs.chemrev.8b00395, 2019.
- 255 Donahue, N. M., Tischuk, J. E., Marquis, B. J., and Huff Hartz, K. E.: Secondary  
256 organic aerosol from limona ketone: insights into terpene ozonolysis via synthesis of  
257 key intermediates, *Phys Chem Chem Phys*, 9, 2991-2998, 10.1039/b701333g, 2007.
- 258 Ehn, M., Thornton, J. A., Kleist, E., Sipilä, M., Junninen, H., Pullinen, I., Springer, M.,  
259 Rubach, F., Tillmann, R., Lee, B., Lopez-Hilfiker, F., Andres, S., Acir, I. H., Rissanen,  
260 M., Jokinen, T., Schobesberger, S., Kangasluoma, J., Kontkanen, J., Nieminen, T.,  
261 Kurtén, T., Nielsen, L. B., Jørgensen, S., Kjaergaard, H. G., Canagaratna, M., Maso,  
262 M. D., Berndt, T., Petäjä, T., Wahner, A., Kerminen, V. M., Kulmala, M., Worsnop,  
263 D. R., Wildt, J., and Mentel, T. F.: A large source of low-volatility secondary organic  
264 aerosol, *Nature*, 506, 476-479, 10.1038/nature13032, 2014.
- 265 Fry, J. L., Kiendler-Scharr, A., Rollins, A. W., Brauers, T., Brown, S. S., Dorn, H. P.,  
266 Dubé, W. P., Fuchs, H., Mensah, A., Rohrer, F., Tillmann, R., Wahner, A., Wooldridge,  
267 P. J., and Cohen, R. C.: SOA from limonene: role of NO<sub>3</sub> in its generation and  
268 degradation, *Atmos Chem Phys*, 11, 3879-3894, 10.5194/acp-11-3879-2011, 2011.
- 269 Guo, Y., Shen, H., Pullinen, I., Luo, H., Kang, S., Vereecken, L., Fuchs, H., Hallquist,  
270 M., Acir, I.-H., Tillmann, R., Rohrer, F., Wildt, J., Kiendler-Scharr, A., Wahner, A.,  
271 Zhao, D., and Mentel, T. F.: Identification of highly oxygenated organic molecules  
272 and their role in aerosol formation in the reaction of limonene with nitrate radical,  
273 *Atmos Chem Phys*, 22, 11323-11346, 10.5194/acp-2022-85, 2022.
- 274 Jokinen, T., Berndt, T., Makkonen, R., Kerminen, V. M., Junninen, H., Paasonen, P.,  
275 Stratmann, F., Herrmann, H., Guenther, A. B., Worsnop, D. R., Kulmala, M., Ehn,  
276 M., and Sipilä, M.: Production of extremely low volatile organic compounds from  
277 biogenic emissions: Measured yields and atmospheric implications, *Proc Natl Acad  
278 Sci U S A*, 112, 7123-7128, 10.1073/pnas.1423977112, 2015.
- 279 Massoli, P., Stark, H., Canagaratna, M. R., Krechmer, J. E., Xu, L., Ng, N. L., Mauldin,  
280 III., Roy L., Yan, C., Kimmel, J., Misztal, P. K., Jimenez, J. L., Jayne, J. T., and  
281 Worsnop, D. R.: Ambient Measurements of Highly Oxidized Gas-Phase Molecules  
282 during the Southern Oxidant and Aerosol Study (SOAS) 2013, *ACS Earth Space  
283 Chem*, 2, 653-672, 10.1021/acsearthspacechem.8b00028, 2018.
- 284 Shen, H., Zhao, D., Pullinen, I., Kang, S., Vereecken, L., Fuchs, H., Acir, I. H., Tillmann,  
285 R., Rohrer, F., Wildt, J., Kiendler-Scharr, A., Wahner, A., and Mentel, T. F.: Highly  
286 Oxygenated Organic Nitrates Formed from NO<sub>3</sub> Radical-Initiated Oxidation of beta-  
287 Pinene, *Environ Sci Technol*, 55, 15658-15671, 10.1021/acs.est.1c03978, 2021.
- 288 Tomaz, S., Wang, D., Zabalegui, N., Li, D., Lamkaddam, H., Bachmeier, F., Vogel, A.,  
289 Monge, M. E., Perrier, S., Baltensperger, U., George, C., Rissanen, M., Ehn, M., El  
290 Haddad, I., and Riva, M.: Structures and reactivity of peroxy radicals and dimeric

291 products revealed by online tandem mass spectrometry, *Nat Commun*, 12, 300,  
292 10.1038/s41467-020-20532-2, 2021.

293 Tröstl, J., Chuang, W. K., Gordon, H., Heinritzi, M., Yan, C., Molteni, U., Ahlm, L.,  
294 Frege, C., Bianchi, F., Wagner, R., Simon, M., Lehtipalo, K., Williamson, C., Craven,  
295 J. S., Duplissy, J., Adamov, A., Almeida, J., Bernhammer, A. K., Breitenlechner, M.,  
296 Brilke, S., Dias, A., Ehrhart, S., Flagan, R. C., Franchin, A., Fuchs, C., Guida, R.,  
297 Gysel, M., Hansel, A., Hoyle, C. R., Jokinen, T., Junninen, H., Kangasluoma, J.,  
298 Keskinen, H., Kim, J., Krapf, M., Kürten, A., Laaksonen, A., Lawler, M., Leiminger,  
299 M., Mathot, S., Möhler, O., Nieminen, T., Onnela, A., Petäjä, T., Piel, F. M.,  
300 Miettinen, P., Rissanen, M. P., Rondo, L., Sarnela, N., Schobesberger, S., Sengupta,  
301 K., Sipilä, M., Smith, J. N., Steiner, G., Tomè, A., Virtanen, A., Wagner, A. C.,  
302 Weingartner, E., Wimmer, D., Winkler, P. M., Ye, P., Carslaw, K. S., Curtius, J.,  
303 Dommen, J., Kirkby, J., Kulmala, M., Riipinen, I., Worsnop, D. R., Donahue, N. M.,  
304 and Baltensperger, U.: The role of low-volatility organic compounds in initial particle  
305 growth in the atmosphere, *Nature*, 533, 527-531, 10.1038/nature18271, 2016.

306 Zhao, D., Pullinen, I., Fuchs, H., Schrade, S., Wu, R., Acir, I.-H., Tillmann, R., Rohrer,  
307 F., Wildt, J., Guo, Y., Kiendler-Scharr, A., Wahner, A., Kang, S., Vereecken, L., and  
308 Mentel, T. F.: Highly oxygenated organic molecule (HOM) formation in the isoprene  
309 oxidation by NO<sub>3</sub> radical, *Atmos Chem Phys*, 21, 9681-9704, 10.5194/acp-21-9681-  
310 2021, 2021.

311 Zhao, D., Schmitt, S. H., Wang, M., Acir, I.-H., Tillmann, R., Tan, Z., Novelli, A., Fuchs,  
312 H., Pullinen, I., Wegener, R., Rohrer, F., Wildt, J., Kiendler-Scharr, A., Wahner, A.,  
313 and Mentel, T. F.: Effects of NO<sub>x</sub> and SO<sub>2</sub> on the secondary organic aerosol formation  
314 from photooxidation of  $\alpha$ -pinene and limonene, *Atmos Chem Phys*, 18, 1611-1628,  
315 10.5194/acp-18-1611-2018, 2018.

316 Zhao, D. F., Buchholz, A., Kortner, B., Schlag, P., Rubach, F., Fuchs, H., Kiendler-  
317 Scharr, A., Tillmann, R., Wahner, A., Watne, Å. K., Hallquist, M., Flores, J. M.,  
318 Rudich, Y., Kristensen, K., Hansen, A. M. K., Glasius, M., Kourtschev, I., Kalberer,  
319 M., and Mentel, T. F.: Cloud condensation nuclei activity, droplet growth kinetics,  
320 and hygroscopicity of biogenic and anthropogenic secondary organic aerosol (SOA),  
321 *Atmos Chem Phys*, 16, 1105-1121, 10.5194/acp-16-1105-2016, 2016.

322
